# Supplementary material for: What Is Health Information Quality? Ethical Dimension and Perception by Users
Source: Front Med (Lausanne). 2018 Sep 20;5:260. doi: 10.3389/fmed.2018.00260 (PMC6158347; doi:10.3389/fmed.2018.00260)
Supplement: Supplementary file 2 [file Data_Sheet_1.XLSX]

## Sheet: Questionnaire raw data
Timestamp	1) How many hours (per week) do you spend searching for information on the web?	2) How many years since you became familiar with Internet?	3) What device do you use to browse Internet (you can select more than one)?	4) Which search engines do you mainly use?	5) In the last year, how often have you tried to seek healthcare information online (for you or for someone else)?	6) Please specify the purpose of seeking health information online. Is it to : (you can select more than one answer)	7) How do you start looking for health information online (think about the last time you did this)? Do you start:	8) Do you believe that pages returned by your search engine are the best matches for your search term.	9) If you make a query in a search engine, how many results do you usually view?	1) I trust a health webpage more if it identifies the author.	2) I trust a health webpage more if it identifies authorâ€™s affiliation or organization (PhD, M.D., University. Hospital, etc.)	3) I trust a health webpage more if it identifies a (written/updated/reviewed) date	4) I trust a health webpage more if it discloses its sources of information.	5) I trust a health website more if it has a copyright notice	6) I trust a health website more if it has a clear privacy policy on how my personal information (including those collected automatically by cookies, history or various forms of tracking) is stored and handled (for example via a privacy link).	7) I trust a health webpage more if the website discloses the owner/sponsor/source of funds.	8) I trust a health webpage more if the website has a disclaimer (usually mentioning they support, not replace, the relationship that exists between a patient and his/her existing physician)	9) I trust a health website more if it has a clear advertising policy (usually there is a link for advertising policy).	10) I trust a health webpage more if it has few advertisements.	11) I trust a health webpage more if its contents are free of spelling errors.	12) I trust a health webpage more if its contents are free of grammatical errors.	13) I trust a health webpage more if the information it contains is not subjective (free from bias or financial interest)	14) I trust a health webpage more if the website provides contact information including postal address/telephone (contact us page).	15) I prefer webpages that are easy to read	16) I ignore webpages that do not focus on the main topic I am looking for	17) I ignore webpages that contain too much information	18) I prefer webpages that are easy to understand (do not use a technical language)	19) I look at the URL of the website and use the domain information (.gov,.edu, .org, .com, etc.) to help me determine whether or not the website is reliable.	20) When a search engine returns a list of pages, I select a page from the list based on their rank provided by the search engine	21) When a search engine returns a list of pages, I select a page from the list based on whether or not it has video/pictures	22) I donâ€™t trust websites that ask for payment information.	23) I prefer webpages that explain the symptoms of the disease I am looking at.	24) I prefer webpages that suggest the possible treatments to the disease	25) I prefer webpages that explain how to take the medications.	26) I prefer webpages that describe any side effects a treatment may cause.	27) I donâ€™t trust websites that offer quick and easy solutions to my health problem with exaggerated words (for example miracle cures, exaggerated claims, sensational news)	28) I prefer a health webpage if it suggests:	Please provide any further comments (please suggest any features you think we didnâ€™t consider)	1) What is your gender?	2) What is your age group?	3) What is your country of residence?	4) What is your education level?	5) What is your subject area? (if applicable)
2017/02/01 1:51:16 PM GMT+1	More than 12 hours	More than 10 years	Personal Computer/Laptop;Tablet;Smart phone;Smart TV	Google	More than 6 times	Research	At a site that specializes in health information, like NHS choices or WebMD (if you use a search engine to reach a specific site select this option)	Somewhat agree	More than 5 links	Somewhat agree	Somewhat agree	Somewhat agree	Somewhat agree	Somewhat agree	Somewhat agree	Somewhat agree	Somewhat agree	Somewhat agree	Somewhat agree	Somewhat agree	Somewhat agree	Somewhat agree	Somewhat agree	Somewhat agree	Somewhat agree	Somewhat agree	Somewhat agree	Somewhat agree	Somewhat agree	Somewhat agree	Somewhat agree	Somewhat agree	Somewhat agree	Somewhat agree	Somewhat agree	Somewhat agree	I donâ€™t know		Male	26-40	Saudi Arabia	Postgraduate	Engineering/Math related
2017/02/01 1:53:17 PM GMT+1	2-6 hours	5-10 years	Personal Computer/Laptop;Smart phone	Google	1-2 times	Look for symptoms and the possible diagnosis	At a general search engine such as Google, Bing or Yahoo	Somewhat agree	More than 5 links	Completely agree	Completely agree	Somewhat agree	Completely agree	Somewhat agree	Somewhat disagree	Neither disagree nor agree	Somewhat agree	Neither disagree nor agree	Somewhat disagree	Completely agree	Completely agree	Completely agree	Neither disagree nor agree	Completely agree	Somewhat agree	Somewhat agree	Somewhat agree	Somewhat agree	Somewhat agree	Somewhat agree	Neither disagree nor agree	Completely agree	Completely agree	Somewhat agree	Neither disagree nor agree	Somewhat agree	Medicine of which the effectiveness was demonstrated scientifically in clinical trials.		Male	18-25	Yemen	Graduate/higher diploma	Engineering/Math related
2017/02/01 1:55:09 PM GMT+1	2-6 hours	More than 10 years	Personal Computer/Laptop;Tablet;Smart phone	Google	More than 6 times	Look for medication for specific disease;Look for symptoms and the possible diagnosis;Read more about disease diagnosed by your doctor;Read about medications prescribed by your doctor	At a general search engine such as Google, Bing or Yahoo	Somewhat agree	More than 5 links	Somewhat agree	Completely agree	Neither disagree nor agree	Somewhat agree	Somewhat agree	Somewhat agree	Neither disagree nor agree	Neither disagree nor agree	Somewhat agree	Somewhat disagree	Somewhat disagree	Somewhat disagree	Somewhat disagree	Completely agree	Completely agree	Somewhat agree	Somewhat disagree	Completely agree	Somewhat agree	Somewhat agree	Somewhat agree	Neither disagree nor agree	Completely agree	Somewhat agree	Neither disagree nor agree	Somewhat agree	Completely agree	Medicine of which the effectiveness was demonstrated scientifically in clinical trials.		Male	26-40	Germany	Postgraduate	Medical related
2017/02/01 2:00:23 PM GMT+1	2-6 hours	More than 10 years	Personal Computer/Laptop;Tablet;Smart phone;Smart TV	Google	More than 6 times	Look for medication for specific disease;Look for symptoms and the possible diagnosis;Read more about disease diagnosed by your doctor	At a general search engine such as Google, Bing or Yahoo	Neither disagree nor agree	2-3 links	Somewhat disagree	Somewhat agree	Completely agree	Completely agree	Completely agree	Neither disagree nor agree	Somewhat agree	Neither disagree nor agree	Somewhat disagree	Somewhat disagree	Somewhat disagree	Somewhat disagree	Somewhat disagree	Somewhat agree	Completely agree	Somewhat agree	Somewhat agree	Completely agree	Completely agree	Somewhat disagree	Somewhat agree	Completely agree	Somewhat agree	Somewhat agree	Somewhat agree	Somewhat agree	Neither disagree nor agree	I donâ€™t mind if it has both 1 & 2		Male	26-40	Saudi Arabia	Postgraduate	Business related
2017/02/01 2:02:53 PM GMT+1	More than 12 hours	5-10 years	Personal Computer/Laptop;Smart phone	Google	More than 6 times	Look for medication for specific disease;Look for symptoms and the possible diagnosis;Read more about disease diagnosed by your doctor;Read about medications prescribed by your doctor	At a general search engine such as Google, Bing or Yahoo	Somewhat agree	More than 5 links	Somewhat agree	Completely agree	Somewhat disagree	Somewhat agree	Somewhat agree	Somewhat agree	Neither disagree nor agree	Neither disagree nor agree	Neither disagree nor agree	Neither disagree nor agree	Neither disagree nor agree	Neither disagree nor agree	Neither disagree nor agree	Neither disagree nor agree	Completely agree	Neither disagree nor agree	Somewhat disagree	Completely agree	Neither disagree nor agree	Neither disagree nor agree	Neither disagree nor agree	Neither disagree nor agree	Completely agree	Somewhat agree	Completely agree	Completely agree	Somewhat agree	I donâ€™t know		Male	26-40	Algeria	High school	Medical related
2017/02/01 2:08:57 PM GMT+1	Less than 2 hours	3-5 years	Personal Computer/Laptop;Smart phone	Google	3-5 times	Look for symptoms and the possible diagnosis	At a general search engine such as Google, Bing or Yahoo	Somewhat disagree	4-5 links	Somewhat agree	Somewhat agree	Somewhat agree	Somewhat agree	Somewhat agree	Neither disagree nor agree	Neither disagree nor agree	Neither disagree nor agree	Somewhat agree	Completely disagree	Neither disagree nor agree	Somewhat disagree	Neither disagree nor agree	Neither disagree nor agree	Somewhat agree	Neither disagree nor agree	Neither disagree nor agree	Neither disagree nor agree	Somewhat agree	Completely agree	Completely disagree	Somewhat disagree	Neither disagree nor agree	Somewhat agree	Somewhat disagree	Somewhat agree	Somewhat agree	Only alternative medicine (any of a range of medical therapies that are not regarded by medical professionals)		Male	18-25	Germany	Postgraduate	Engineering/Math related
2017/02/01 2:09:52 PM GMT+1	More than 12 hours	More than 10 years	Personal Computer/Laptop;Smart phone	Google	More than 6 times	Look for medication for specific disease;Read about medications prescribed by your doctor	At a social network site like Facebook	Somewhat agree	4-5 links	Somewhat agree	Completely agree	Somewhat agree	Somewhat agree	Completely agree	Completely agree	Completely agree	Neither disagree nor agree	Completely disagree	Somewhat agree	Completely disagree	Somewhat agree	Completely agree	Completely agree	Somewhat agree	Completely agree	Completely agree	Completely agree	Somewhat agree	Completely agree	Completely agree	Completely agree	Completely agree	Completely agree	Completely agree	Completely agree	Completely disagree	I donâ€™t know		Male	26-40	United Arab Emirates	Graduate/higher diploma	Business related
2017/02/01 2:10:17 PM GMT+1	More than 12 hours	Less than 3 years	Personal Computer/Laptop;Tablet;Smart phone	Google;Bing;Yahoo!	More than 6 times	Look for medication for specific disease	At a social network site like Facebook	Somewhat agree	2-3 links	Somewhat disagree	Somewhat disagree	Somewhat disagree	Somewhat disagree	Somewhat agree	Somewhat agree	Somewhat agree	Somewhat agree	Somewhat agree	Somewhat agree	Somewhat agree	Somewhat agree	Somewhat agree	Somewhat agree	Completely agree	Somewhat agree	Somewhat agree	Completely agree	Somewhat agree	Somewhat agree	Somewhat agree	Somewhat agree	Somewhat agree	Somewhat agree	Somewhat agree	Somewhat agree	Somewhat agree	I donâ€™t know		Male	26-40	Yemen	Postgraduate	Medical related
2017/02/01 2:13:42 PM GMT+1	2-6 hours	More than 10 years	Personal Computer/Laptop;Tablet;Smart phone;Smart TV	Google	1-2 times	Look for medication for specific disease	At a general search engine such as Google, Bing or Yahoo	Neither disagree nor agree	4-5 links	Neither disagree nor agree	Somewhat agree	Neither disagree nor agree	Somewhat agree	Completely agree	Completely agree	Somewhat agree	Somewhat agree	Somewhat agree	Neither disagree nor agree	Completely agree	Completely agree	Neither disagree nor agree	Completely agree	Completely agree	Completely agree	Somewhat agree	Completely agree	Somewhat agree	Neither disagree nor agree	Neither disagree nor agree	Somewhat agree	Completely agree	Completely agree	Completely agree	Completely agree	Completely agree	I donâ€™t know		Male	18-25	United Kingdom	Graduate/higher diploma	Engineering/Math related
2017/02/01 2:14:23 PM GMT+1	7-12 hours	5-10 years	Personal Computer/Laptop	Google	3-5 times	Look for medication for specific disease;Look for symptoms and the possible diagnosis;Read more about disease diagnosed by your doctor;Read about medications prescribed by your doctor	At a general search engine such as Google, Bing or Yahoo	Completely agree	4-5 links	Somewhat agree	Somewhat agree	Somewhat agree	Neither disagree nor agree	Somewhat disagree	Neither disagree nor agree	Somewhat agree	Somewhat agree	Somewhat agree	Somewhat agree	Neither disagree nor agree	Somewhat agree	Somewhat agree	Somewhat agree	Completely agree	Somewhat agree	Somewhat agree	Completely agree	Somewhat disagree	Somewhat agree	Somewhat agree	Somewhat agree	Somewhat agree	Somewhat agree	Somewhat agree	Completely agree	Somewhat agree	I donâ€™t mind if it has both 1 & 2		Female	26-40	Saudi Arabia	Postgraduate	Business related
2017/02/01 2:18:45 PM GMT+1	2-6 hours	More than 10 years	Personal Computer/Laptop;Tablet;Smart phone	Google;Yahoo!	3-5 times	Look for medication for specific disease;Look for symptoms and the possible diagnosis	At a general search engine such as Google, Bing or Yahoo	Somewhat agree	More than 5 links	Somewhat agree	Completely agree	Somewhat agree	Completely agree	Somewhat agree	Somewhat agree	Completely agree	Somewhat agree	Neither disagree nor agree	Neither disagree nor agree	Somewhat agree	Somewhat agree	Completely agree	Somewhat agree	Completely agree	Somewhat agree	Somewhat agree	Completely agree	Completely agree	Somewhat agree	Neither disagree nor agree	Completely agree	Completely agree	Completely agree	Completely agree	Completely agree	Neither disagree nor agree	Medicine of which the effectiveness was demonstrated scientifically in clinical trials.		Female	26-40	United Kingdom	Postgraduate	Engineering/Math related
2017/02/01 2:19:02 PM GMT+1	2-6 hours	3-5 years	Personal Computer/Laptop;Smart phone;Smart TV	Google	3-5 times	Look for symptoms and the possible diagnosis;Read about medications prescribed by your doctor	At a site that specializes in health information, like NHS choices or WebMD (if you use a search engine to reach a specific site select this option)	Somewhat disagree	2-3 links	Somewhat disagree	Somewhat agree	Somewhat disagree	Somewhat disagree	Neither disagree nor agree	Neither disagree nor agree	Neither disagree nor agree	Completely disagree	Somewhat disagree	Somewhat agree	Completely disagree	Somewhat disagree	Somewhat agree	Neither disagree nor agree	Somewhat disagree	Somewhat disagree	Neither disagree nor agree	Somewhat disagree	Somewhat disagree	Somewhat disagree	Somewhat disagree	Somewhat disagree	Somewhat disagree	Somewhat disagree	Somewhat disagree	Somewhat disagree	Somewhat disagree	Medicine of which the effectiveness was demonstrated scientifically in clinical trials.		Male	26-40		Graduate/higher diploma	Engineering/Math related
2017/02/01 2:22:26 PM GMT+1	2-6 hours	More than 10 years	Personal Computer/Laptop;Tablet;Smart phone	Google	I have never sought health information online	Look for symptoms and the possible diagnosis	At a site that specializes in health information, like NHS choices or WebMD (if you use a search engine to reach a specific site select this option)	Completely disagree	2-3 links	Neither disagree nor agree	Somewhat agree	Somewhat agree	Completely agree	Somewhat agree	Neither disagree nor agree	Completely disagree	Completely agree	Neither disagree nor agree	Somewhat agree	Somewhat agree	Somewhat agree	Completely disagree	Neither disagree nor agree	Neither disagree nor agree	Somewhat disagree	Completely disagree	Completely agree	Completely disagree	Completely agree	Completely disagree	Completely disagree	Completely disagree	Neither disagree nor agree	Neither disagree nor agree	Completely disagree	Completely disagree	I donâ€™t know		Male	18-25	St Kitts & Nevis	Graduate/higher diploma	Business related
2017/02/01 2:30:07 PM GMT+1	7-12 hours	More than 10 years	Personal Computer/Laptop;Smart phone	Google	More than 6 times	Look for medication for specific disease;Look for symptoms and the possible diagnosis;Read more about disease diagnosed by your doctor;Read about medications prescribed by your doctor	At a general search engine such as Google, Bing or Yahoo	Somewhat agree	4-5 links	Somewhat agree	Completely agree	Somewhat agree	Somewhat agree	Completely agree	Completely agree	Somewhat agree	Somewhat agree	Neither disagree nor agree	Completely disagree	Somewhat agree	Somewhat agree	Somewhat agree	Somewhat agree	Somewhat agree	Somewhat agree	Somewhat disagree	Somewhat disagree	Neither disagree nor agree	Neither disagree nor agree	Neither disagree nor agree	Neither disagree nor agree	Somewhat agree	Somewhat agree	Somewhat agree	Completely agree	Completely agree	I donâ€™t know		Female	26-40	Iraq	Postgraduate	Business related
2017/02/01 2:34:57 PM GMT+1	More than 12 hours	More than 10 years	Personal Computer/Laptop;Smart phone	Google	3-5 times	Look for symptoms and the possible diagnosis	At a site that specializes in health information, like NHS choices or WebMD (if you use a search engine to reach a specific site select this option)	Somewhat agree	2-3 links	Neither disagree nor agree	Neither disagree nor agree	Somewhat agree	Completely agree	Neither disagree nor agree	Neither disagree nor agree	Neither disagree nor agree	Somewhat agree	Neither disagree nor agree	Somewhat agree	Completely agree	Completely agree	Somewhat agree	Neither disagree nor agree	Somewhat agree	Somewhat agree	Somewhat agree	Somewhat agree	Somewhat agree	Somewhat agree	Somewhat disagree	Completely agree	Somewhat agree	Neither disagree nor agree	Neither disagree nor agree	Neither disagree nor agree	Completely agree	Medicine of which the effectiveness was demonstrated scientifically in clinical trials.		Female	26-40	United Kingdom	Postgraduate	Engineering/Math related
2017/02/01 2:36:43 PM GMT+1	More than 12 hours	More than 10 years	Personal Computer/Laptop;Tablet;Smart phone	Google	More than 6 times	Look for medication for specific disease;Look for symptoms and the possible diagnosis;Read more about disease diagnosed by your doctor;Read about medications prescribed by your doctor	At a general search engine such as Google, Bing or Yahoo	Somewhat agree	4-5 links	Somewhat agree	Completely agree	Neither disagree nor agree	Completely agree	Neither disagree nor agree	Neither disagree nor agree	Completely agree	Neither disagree nor agree	Neither disagree nor agree	Somewhat agree	Completely agree	Completely agree	Completely agree	Neither disagree nor agree	Completely agree	Completely agree	Somewhat agree	Somewhat agree	Neither disagree nor agree	Somewhat agree	Somewhat agree	Neither disagree nor agree	Completely agree	Completely agree	Completely agree	Completely agree	Completely agree	Medicine of which the effectiveness was demonstrated scientifically in clinical trials.		Male	26-40	Yemen	Postgraduate	Engineering/Math related
2017/02/01 2:46:19 PM GMT+1	2-6 hours	More than 10 years	Personal Computer/Laptop	Google	More than 6 times	Look for medication for specific disease;Look for symptoms and the possible diagnosis;Read more about disease diagnosed by your doctor;Read about medications prescribed by your doctor	At a general search engine such as Google, Bing or Yahoo	Somewhat agree	More than 5 links	Neither disagree nor agree	Neither disagree nor agree	Neither disagree nor agree	Somewhat agree	Somewhat agree	Somewhat agree	Somewhat agree	Completely agree	Somewhat agree	Neither disagree nor agree	Somewhat agree	Completely agree	Somewhat agree	Somewhat agree	Completely agree	Completely agree	Somewhat agree	Completely agree	Somewhat agree	Somewhat agree	Somewhat agree	Neither disagree nor agree	Somewhat agree	Somewhat agree	Somewhat agree	Somewhat agree	Neither disagree nor agree	I donâ€™t mind if it has both 1 & 2		Male	26-40	Saudi Arabia	Postgraduate	Engineering/Math related
2017/02/01 2:46:57 PM GMT+1	2-6 hours	5-10 years	Personal Computer/Laptop;Tablet;Smart phone	Google	More than 6 times	Look for medication for specific disease;Look for symptoms and the possible diagnosis;Read more about disease diagnosed by your doctor;Read about medications prescribed by your doctor	At a more general site like Wikipedia, that contains information on all kinds of topics (if you use a search engine to reach a specific site select this option)	Completely agree	More than 5 links	Completely disagree	Completely disagree	Completely agree	Somewhat agree	Somewhat disagree	Somewhat disagree	Somewhat disagree	Somewhat disagree	Somewhat agree	Completely agree	Completely agree	Completely agree	Completely agree	Somewhat disagree	Completely agree	Completely agree	Completely agree	Completely agree	Completely agree	Completely agree	Completely disagree	Completely agree	Completely agree	Completely agree	Completely agree	Completely agree	Completely agree	Medicine of which the effectiveness was demonstrated scientifically in clinical trials.		Male	41-60	Germany	Postgraduate	Medical related
2017/02/01 2:47:56 PM GMT+1	Less than 2 hours	Less than 3 years	Personal Computer/Laptop;Tablet;Smart phone	Google	More than 6 times	Look for medication for specific disease;Read about medications prescribed by your doctor	At a general search engine such as Google, Bing or Yahoo	Somewhat agree	2-3 links	Somewhat disagree	Somewhat agree	Somewhat agree	Somewhat agree	Somewhat agree	Somewhat agree	Somewhat agree	Somewhat agree	Somewhat agree	Somewhat agree	Somewhat agree	Somewhat agree	Somewhat agree	Somewhat agree	Somewhat agree	Somewhat agree	Somewhat agree	Somewhat agree	Somewhat agree	Completely disagree	Completely disagree	Completely agree	Somewhat agree	Somewhat agree	Completely agree	Completely agree	Completely agree	I donâ€™t know		Male	41-60	Germany	High school	Engineering/Math related
2017/02/01 2:54:57 PM GMT+1	Less than 2 hours	Less than 3 years	Personal Computer/Laptop;Smart phone	Google	More than 6 times	Look for symptoms and the possible diagnosis;Read more about disease diagnosed by your doctor	At a general search engine such as Google, Bing or Yahoo	Somewhat agree	More than 5 links	Neither disagree nor agree	Completely agree	Somewhat agree	Neither disagree nor agree	Neither disagree nor agree	Completely agree	Somewhat agree	Neither disagree nor agree	Somewhat agree	Somewhat disagree	Completely disagree	Somewhat disagree	Completely agree	Completely agree	Completely agree	Completely agree	Somewhat agree	Somewhat agree	Completely agree	Somewhat agree	Somewhat agree	Completely agree	Completely agree	Completely agree	Neither disagree nor agree	Completely agree	Completely agree	I donâ€™t know		Male	41-60		High school
2017/02/01 2:59:48 PM GMT+1	7-12 hours	5-10 years	Smart phone	Google	1-2 times	Look for medication for specific disease;Look for symptoms and the possible diagnosis	At a general search engine such as Google, Bing or Yahoo	Somewhat disagree	Just one link	Completely agree	Completely agree	Completely agree	Completely agree	Completely agree	Completely agree	Somewhat agree	Somewhat agree	Somewhat agree	Completely agree	Completely agree	Completely agree	Completely agree	Completely agree	Completely agree	Completely agree	Completely agree	Completely agree	Somewhat agree	Somewhat agree	Somewhat disagree	Somewhat agree	Completely agree	Completely agree	Completely agree	Completely agree	Completely agree	I donâ€™t mind if it has both 1 & 2		Female	26-40	United Kingdom	Postgraduate	Engineering/Math related
2017/02/01 3:12:20 PM GMT+1	2-6 hours	More than 10 years	Personal Computer/Laptop;Smart phone	Google	1-2 times	Look for medication for specific disease;Look for symptoms and the possible diagnosis;Read more about disease diagnosed by your doctor	At a general search engine such as Google, Bing or Yahoo	Somewhat agree	2-3 links	Neither disagree nor agree	Neither disagree nor agree	Neither disagree nor agree	Neither disagree nor agree	Neither disagree nor agree	Neither disagree nor agree	Neither disagree nor agree	Neither disagree nor agree	Neither disagree nor agree	Neither disagree nor agree	Somewhat disagree	Somewhat disagree	Somewhat disagree	Somewhat disagree	Somewhat disagree	Somewhat disagree	Neither disagree nor agree	Somewhat disagree	Somewhat disagree	Somewhat disagree	Somewhat disagree	Somewhat disagree	Somewhat disagree	Somewhat disagree	Somewhat disagree	Neither disagree nor agree	Somewhat disagree	I donâ€™t know		Male	26-40	Jordan	Graduate/higher diploma	Engineering/Math related
2017/02/01 3:14:08 PM GMT+1	Less than 2 hours	More than 10 years	Smart phone	Google	More than 6 times	Read more about disease diagnosed by your doctor	At a general search engine such as Google, Bing or Yahoo	Somewhat disagree	4-5 links	Somewhat disagree	Somewhat disagree	Somewhat disagree	Somewhat disagree	Neither disagree nor agree	Neither disagree nor agree	Neither disagree nor agree	Neither disagree nor agree	Neither disagree nor agree	Neither disagree nor agree	Neither disagree nor agree	Neither disagree nor agree	Neither disagree nor agree	Somewhat agree	Somewhat disagree	Neither disagree nor agree	Neither disagree nor agree	Neither disagree nor agree	Neither disagree nor agree	Neither disagree nor agree	Somewhat disagree	Somewhat disagree	Somewhat disagree	Completely disagree	Completely disagree	Somewhat disagree	Somewhat disagree	I donâ€™t know		Male	26-40	United Kingdom	Postgraduate	Arts related
2017/02/01 3:17:43 PM GMT+1	2-6 hours	More than 10 years	Personal Computer/Laptop;Smart phone	Google	More than 6 times	Look for medication for specific disease;Look for symptoms and the possible diagnosis	At a social network site like Facebook	Somewhat agree	More than 5 links	Completely disagree	Completely agree	Somewhat agree	Somewhat agree	Somewhat agree	Somewhat agree	Somewhat agree	Completely agree	Neither disagree nor agree	Neither disagree nor agree	Neither disagree nor agree	Neither disagree nor agree	Somewhat agree	Completely agree	Completely agree	Completely agree	Completely agree	Completely agree	Somewhat agree	Somewhat agree	Completely agree	Completely agree	Completely agree	Completely agree	Completely agree	Completely agree	Completely agree	I donâ€™t know	OMAR ALBAITI	Male	26-40	Saudi Arabia	Graduate/higher diploma
2017/02/01 3:27:25 PM GMT+1	2-6 hours	5-10 years	Personal Computer/Laptop;Smart phone	Google	3-5 times	Look for medication for specific disease;Look for symptoms and the possible diagnosis;Read more about disease diagnosed by your doctor	At a site that specializes in health information, like NHS choices or WebMD (if you use a search engine to reach a specific site select this option)	Somewhat disagree	4-5 links	Somewhat agree	Completely agree	Somewhat agree	Neither disagree nor agree	Neither disagree nor agree	Neither disagree nor agree	Neither disagree nor agree	Neither disagree nor agree	Neither disagree nor agree	Somewhat agree	Completely agree	Somewhat agree	Somewhat agree	Somewhat agree	Completely agree	Somewhat agree	Somewhat agree	Somewhat agree	Somewhat agree	Neither disagree nor agree	Completely disagree	Somewhat agree	Somewhat agree	Somewhat agree	Somewhat agree	Somewhat agree	Somewhat agree	I donâ€™t know		Male	18-25	United Kingdom	Graduate/higher diploma	Computing
2017/02/01 3:33:28 PM GMT+1	2-6 hours	More than 10 years	Personal Computer/Laptop;Tablet;Smart phone	Google	More than 6 times	Look for medication for specific disease;Look for symptoms and the possible diagnosis;Read more about disease diagnosed by your doctor	At a general search engine such as Google, Bing or Yahoo	Somewhat agree	2-3 links	Somewhat agree	Neither disagree nor agree	Neither disagree nor agree	Neither disagree nor agree	Somewhat agree	Neither disagree nor agree	Neither disagree nor agree	Neither disagree nor agree	Neither disagree nor agree	Somewhat agree	Somewhat agree	Somewhat agree	Somewhat agree	Neither disagree nor agree	Somewhat agree	Somewhat agree	Somewhat agree	Somewhat agree	Somewhat agree	Neither disagree nor agree	Somewhat disagree	Somewhat agree	Neither disagree nor agree	Somewhat agree	Neither disagree nor agree	Somewhat agree	Neither disagree nor agree	I donâ€™t mind if it has both 1 & 2		Male	26-40	Jordan	Postgraduate	Engineering/Math related
2017/02/01 3:36:01 PM GMT+1	7-12 hours	5-10 years	Personal Computer/Laptop;Smart phone	Google;Ù…Ø­Ø±ÙƒØ§Øª Ø§Ù„Ø¨Ø­Ø« Ø§Ù„Ø¹Ù„Ù…ÙŠØ© Ø§Ù„Ø§Ø®Ø±Ù‰	More than 6 times	Look for symptoms and the possible diagnosis;Read more about disease diagnosed by your doctor	At a general search engine such as Google, Bing or Yahoo	Somewhat disagree	More than 5 links	Completely disagree	Completely disagree	Completely disagree	Completely disagree	Completely disagree	Completely disagree	Completely disagree	Completely disagree	Completely disagree	Completely disagree	Completely disagree	Completely disagree	Completely disagree	Completely disagree	Completely disagree	Completely disagree	Completely disagree	Completely disagree	Completely disagree	Completely disagree	Completely disagree	Completely agree	Completely disagree	Completely disagree	Completely disagree	Completely disagree	Completely disagree	Medicine of which the effectiveness was demonstrated scientifically in clinical trials.		Male	26-40	Yemen	Postgraduate	Engineering/Math related
2017/02/01 3:38:07 PM GMT+1	Less than 2 hours	5-10 years	Smart phone	Google	3-5 times	Look for symptoms and the possible diagnosis	At a general search engine such as Google, Bing or Yahoo	Neither disagree nor agree	More than 5 links	Completely disagree	Somewhat disagree	Completely disagree	Completely disagree	Somewhat disagree	Completely disagree	Completely disagree	Completely disagree	Completely disagree	Completely disagree	Completely disagree	Completely disagree	Completely disagree	Somewhat agree	Completely agree	Completely agree	Completely agree	Completely disagree	Completely agree	Completely agree	Somewhat agree	Completely disagree	Somewhat agree	Somewhat disagree	Somewhat agree	Somewhat agree	Completely agree	I donâ€™t mind if it has both 1 & 2		Male	18-25	Yemen	Graduate/higher diploma	Engineering/Math related
2017/02/01 3:54:38 PM GMT+1	Less than 2 hours	More than 10 years	Personal Computer/Laptop;Smart phone	Google	1-2 times	Look for medication for specific disease	At a general search engine such as Google, Bing or Yahoo	Somewhat agree	2-3 links	Neither disagree nor agree	Somewhat agree	Somewhat agree	Somewhat agree	Neither disagree nor agree	Completely agree	Somewhat agree	Neither disagree nor agree	Neither disagree nor agree	Somewhat disagree	Completely agree	Completely agree	Somewhat agree	Somewhat agree	Somewhat agree	Somewhat agree	Somewhat agree	Completely agree	Neither disagree nor agree	Somewhat disagree	Neither disagree nor agree	Neither disagree nor agree	Somewhat agree	Neither disagree nor agree	Somewhat agree	Somewhat agree	Somewhat disagree	I donâ€™t know		Male	26-40		Graduate/higher diploma	E-commerce
2017/02/01 3:59:04 PM GMT+1	2-6 hours	More than 10 years	Personal Computer/Laptop;Tablet;Smart phone;Smart TV	Google;Yahoo!	1-2 times	Look for symptoms and the possible diagnosis;Read more about disease diagnosed by your doctor	At a more general site like Wikipedia, that contains information on all kinds of topics (if you use a search engine to reach a specific site select this option)	Somewhat agree	4-5 links	Completely disagree	Somewhat agree	Completely agree	Completely disagree	Somewhat agree	Somewhat agree	Somewhat agree	Somewhat agree	Somewhat disagree	Somewhat agree	Somewhat disagree	Completely agree	Somewhat agree	Somewhat agree	Somewhat agree	Somewhat agree	Somewhat agree	Somewhat agree	Somewhat agree	Somewhat agree	Somewhat agree	Somewhat agree	Somewhat agree	Somewhat agree	Somewhat disagree	Somewhat disagree	Neither disagree nor agree	I donâ€™t mind if it has both 1 & 2		Male	26-40	Yemen	Postgraduate	Computer Information System
2017/02/01 4:03:27 PM GMT+1	2-6 hours	More than 10 years	Personal Computer/Laptop;Smart phone	Google	More than 6 times	Look for medication for specific disease;Look for symptoms and the possible diagnosis;Read more about disease diagnosed by your doctor;Read about medications prescribed by your doctor	At a general search engine such as Google, Bing or Yahoo	Somewhat agree	More than 5 links	Somewhat agree	Somewhat agree	Somewhat agree	Completely agree	Completely agree	Completely agree	Neither disagree nor agree	Neither disagree nor agree	Somewhat agree	Somewhat disagree	Completely agree	Completely agree	Completely agree	Completely agree	Somewhat disagree	Somewhat agree	Somewhat disagree	Somewhat agree	Completely agree	Completely agree	Somewhat disagree	Completely agree	Completely agree	Completely agree	Completely agree	Completely agree	Somewhat agree	I donâ€™t know		Male	26-40	Saudi Arabia	High school	Business related
2017/02/01 4:09:07 PM GMT+1	2-6 hours	More than 10 years	Personal Computer/Laptop;Smart phone	Google	More than 6 times	Look for medication for specific disease;Look for symptoms and the possible diagnosis;Read more about disease diagnosed by your doctor;Read about medications prescribed by your doctor;Look for kid health advices	At a general search engine such as Google, Bing or Yahoo	Somewhat agree	More than 5 links	Completely agree	Completely agree	Somewhat agree	Completely agree	Neither disagree nor agree	Neither disagree nor agree	Somewhat disagree	Neither disagree nor agree	Neither disagree nor agree	Neither disagree nor agree	Neither disagree nor agree	Neither disagree nor agree	Neither disagree nor agree	Somewhat agree	Somewhat agree	Somewhat disagree	Somewhat agree	Somewhat agree	Somewhat agree	Somewhat disagree	Somewhat disagree	Neither disagree nor agree	Completely agree	Somewhat agree	Somewhat agree	Completely agree	Neither disagree nor agree	I donâ€™t know		Male	26-40	Canada	Postgraduate	Engineering/Math related
2017/02/01 4:09:51 PM GMT+1	7-12 hours	More than 10 years	Personal Computer/Laptop;Smart phone	Google	3-5 times	Look for symptoms and the possible diagnosis	At a more general site like Wikipedia, that contains information on all kinds of topics (if you use a search engine to reach a specific site select this option)	Neither disagree nor agree	4-5 links	Neither disagree nor agree	Neither disagree nor agree	Neither disagree nor agree	Somewhat agree	Neither disagree nor agree	Neither disagree nor agree	Somewhat agree	Neither disagree nor agree	Neither disagree nor agree	Somewhat agree	Somewhat agree	Somewhat agree	Somewhat agree	Neither disagree nor agree	Neither disagree nor agree	Somewhat agree	Neither disagree nor agree	Neither disagree nor agree	Somewhat agree	Somewhat agree	Neither disagree nor agree	Completely agree	Somewhat agree	Somewhat agree	Neither disagree nor agree	Neither disagree nor agree	Somewhat agree	Medicine of which the effectiveness was demonstrated scientifically in clinical trials.		Male	26-40	Canada	Postgraduate	Engineering/Math related
2017/02/01 4:10:37 PM GMT+1	7-12 hours	3-5 years	Personal Computer/Laptop	Google;Yahoo!	1-2 times	Look for symptoms and the possible diagnosis	At a general search engine such as Google, Bing or Yahoo	Somewhat agree	2-3 links	Neither disagree nor agree	Somewhat agree	Somewhat disagree	Somewhat disagree	Somewhat agree	Neither disagree nor agree	Neither disagree nor agree	Somewhat agree	Completely agree	Somewhat agree	Somewhat agree	Neither disagree nor agree	Somewhat agree	Completely agree	Completely agree	Completely agree	Somewhat agree	Completely agree	Completely agree	Completely agree	Somewhat agree	Completely agree	Completely agree	Somewhat agree	Somewhat agree	Completely agree	Somewhat agree	Only alternative medicine (any of a range of medical therapies that are not regarded by medical professionals)		Male	26-40	Iraq	Postgraduate	Engineering/Math related
2017/02/01 4:14:57 PM GMT+1	More than 12 hours	More than 10 years	Personal Computer/Laptop;Smart phone;Amazon Echo	Google	More than 6 times	Look for symptoms and the possible diagnosis;Read more about disease diagnosed by your doctor;Read about medications prescribed by your doctor	At a general search engine such as Google, Bing or Yahoo	Somewhat agree	4-5 links	Completely agree	Completely agree	Completely agree	Completely agree	Neither disagree nor agree	Completely agree	Completely agree	Completely agree	Completely agree	Completely agree	Neither disagree nor agree	Somewhat disagree	Completely agree	Completely agree	Completely agree	Completely agree	Completely agree	Completely agree	Completely agree	Completely agree	Completely agree	Completely agree	Completely agree	Somewhat agree	Somewhat agree	Somewhat agree	Completely agree	Medicine of which the effectiveness was demonstrated scientifically in clinical trials.		Male	26-40	Germany	Graduate/higher diploma	Engineering/Math related
2017/02/01 4:18:10 PM GMT+1	2-6 hours	More than 10 years	Personal Computer/Laptop;Smart phone	Google	More than 6 times	Look for symptoms and the possible diagnosis;Read about medications prescribed by your doctor	At a general search engine such as Google, Bing or Yahoo	Somewhat disagree	More than 5 links	Somewhat agree	Completely agree	Completely agree	Somewhat agree	Somewhat agree	Somewhat agree	Somewhat agree	Neither disagree nor agree	Neither disagree nor agree	Neither disagree nor agree	Neither disagree nor agree	Neither disagree nor agree	Neither disagree nor agree	Neither disagree nor agree	Neither disagree nor agree	Neither disagree nor agree	Neither disagree nor agree	Neither disagree nor agree	Neither disagree nor agree	Neither disagree nor agree	Neither disagree nor agree	Neither disagree nor agree	Neither disagree nor agree	Neither disagree nor agree	Neither disagree nor agree	Neither disagree nor agree	Neither disagree nor agree	I donâ€™t mind if it has both 1 & 2		Male	26-40	Yemen	Graduate/higher diploma	Business related
2017/02/01 4:34:36 PM GMT+1	2-6 hours	More than 10 years	Personal Computer/Laptop;Smart phone	Google	More than 6 times	Look for medication for specific disease;Read about medications prescribed by your doctor	At a general search engine such as Google, Bing or Yahoo	Somewhat agree	More than 5 links	Somewhat agree	Somewhat agree	Somewhat agree	Completely agree	Somewhat agree	Neither disagree nor agree	Neither disagree nor agree	Neither disagree nor agree	Neither disagree nor agree	Neither disagree nor agree	Somewhat agree	Somewhat agree	Neither disagree nor agree	Somewhat agree	Completely agree	Somewhat agree	Somewhat disagree	Somewhat agree	Somewhat agree	Somewhat agree	Neither disagree nor agree	Somewhat agree	Completely agree	Somewhat agree	Somewhat agree	Somewhat agree	Neither disagree nor agree	I donâ€™t mind if it has both 1 & 2		Male	26-40	Saudi Arabia	Graduate/higher diploma	Engineering/Math related
2017/02/01 4:35:59 PM GMT+1	More than 12 hours	More than 10 years	Personal Computer/Laptop;Tablet;Smart phone	Google;IEEE Xplore	I have never sought health information online	I never seek health information online	I never sought health information online	Somewhat agree	More than 5 links	Neither disagree nor agree	Neither disagree nor agree	Neither disagree nor agree	Somewhat disagree	Somewhat agree	Somewhat agree	Somewhat agree	Neither disagree nor agree	Somewhat agree	Neither disagree nor agree	Somewhat agree	Completely agree	Somewhat agree	Neither disagree nor agree	Completely agree	Completely agree	Somewhat agree	Somewhat disagree	Neither disagree nor agree	Neither disagree nor agree	Somewhat disagree	Completely agree	Somewhat disagree	Somewhat agree	Completely agree	Somewhat agree	Neither disagree nor agree	I donâ€™t mind if it has both 1 & 2		Male	26-40	Saudi Arabia	Graduate/higher diploma	Engineering/Math related
2017/02/01 4:49:41 PM GMT+1	2-6 hours	5-10 years	Personal Computer/Laptop;Smart phone	Google	3-5 times	Look for medication for specific disease	At a general search engine such as Google, Bing or Yahoo	Somewhat agree	2-3 links	Somewhat disagree	Somewhat disagree	Neither disagree nor agree	Somewhat disagree	Completely disagree	Somewhat agree	Somewhat agree	Somewhat agree	Somewhat agree	Completely agree	Completely agree	Completely agree	Somewhat agree	Completely agree	Completely agree	Completely agree	Somewhat agree	Completely agree	Completely agree	Somewhat agree	Somewhat agree	Completely agree	Neither disagree nor agree	Somewhat agree	Completely agree	Completely agree	Somewhat disagree	Medicine of which the effectiveness was demonstrated scientifically in clinical trials.		Male	26-40	Saudi Arabia	Postgraduate	Engineering/Math related
2017/02/01 4:53:03 PM GMT+1	2-6 hours	5-10 years	Personal Computer/Laptop;Smart phone	Google	More than 6 times	Look for symptoms and the possible diagnosis	At a general search engine such as Google, Bing or Yahoo	Somewhat agree	2-3 links	Somewhat agree	Somewhat agree	Completely agree	Neither disagree nor agree	Somewhat agree	Somewhat disagree	Somewhat agree	Neither disagree nor agree	Neither disagree nor agree	Somewhat agree	Somewhat disagree	Somewhat agree	Somewhat agree	Somewhat agree	Somewhat agree	Somewhat agree	Completely agree	Completely agree	Somewhat agree	Somewhat agree	Neither disagree nor agree	Completely agree	Completely agree	Completely agree	Completely agree	Completely agree	Somewhat agree	Medicine of which the effectiveness was demonstrated scientifically in clinical trials.		Male	18-25	United Kingdom	Graduate/higher diploma	Engineering/Math related
2017/02/01 4:53:04 PM GMT+1	More than 12 hours	More than 10 years	Smart phone	Google	3-5 times	Read more about disease diagnosed by your doctor	At a more general site like Wikipedia, that contains information on all kinds of topics (if you use a search engine to reach a specific site select this option)	Somewhat agree	4-5 links	Neither disagree nor agree	Somewhat disagree	Somewhat agree	Somewhat agree	Neither disagree nor agree	Somewhat disagree	Neither disagree nor agree	Somewhat agree	Somewhat agree	Somewhat disagree	Somewhat agree	Neither disagree nor agree	Somewhat agree	Neither disagree nor agree	Neither disagree nor agree	Somewhat agree	Completely disagree	Neither disagree nor agree	Somewhat agree	Completely disagree	Completely disagree	Completely disagree	Completely disagree	Completely agree	Somewhat disagree	Neither disagree nor agree	Neither disagree nor agree	Medicine of which the effectiveness was demonstrated scientifically in clinical trials.		Male	26-40		Postgraduate	Business related
2017/02/01 4:55:59 PM GMT+1	Less than 2 hours	5-10 years	Smart phone	Google	3-5 times	Look for medication for specific disease;Read more about disease diagnosed by your doctor	At a more general site like Wikipedia, that contains information on all kinds of topics (if you use a search engine to reach a specific site select this option)	Completely disagree	More than 5 links	Somewhat disagree	Somewhat disagree	Somewhat disagree	Somewhat disagree	Completely agree	Neither disagree nor agree	Completely disagree	Neither disagree nor agree	Somewhat agree	Somewhat agree	Somewhat agree	Somewhat agree	Neither disagree nor agree	Neither disagree nor agree	Somewhat agree	Completely agree	Completely agree	Completely agree	Completely agree	Completely agree	Completely agree	Somewhat agree	Neither disagree nor agree	Somewhat disagree	Neither disagree nor agree	Somewhat disagree	Somewhat disagree	Only alternative medicine (any of a range of medical therapies that are not regarded by medical professionals)		Male	26-40		Postgraduate	Business related
2017/02/01 5:00:42 PM GMT+1	2-6 hours	More than 10 years	Personal Computer/Laptop;Smart phone	Google	More than 6 times	Look for symptoms and the possible diagnosis;Read about medications prescribed by your doctor	At a general search engine such as Google, Bing or Yahoo	Somewhat agree	4-5 links	Completely agree	Completely agree	Completely agree	Completely agree	Somewhat agree	Somewhat agree	Neither disagree nor agree	Somewhat agree	Neither disagree nor agree	Somewhat disagree	Completely agree	Completely agree	Completely agree	Completely agree	Completely agree	Somewhat agree	Somewhat agree	Somewhat agree	Completely agree	Somewhat agree	Somewhat agree	Somewhat agree	Somewhat agree	Somewhat agree	Somewhat agree	Completely agree	Somewhat agree	Medicine of which the effectiveness was demonstrated scientifically in clinical trials.		Male	26-40	United Kingdom	Graduate/higher diploma	Engineering/Math related
2017/02/01 5:14:56 PM GMT+1	Less than 2 hours	More than 10 years	Personal Computer/Laptop;Smart phone	Google	More than 6 times	Look for medication for specific disease;Read more about disease diagnosed by your doctor;Read about medications prescribed by your doctor	At a general search engine such as Google, Bing or Yahoo	Somewhat agree	More than 5 links	Somewhat agree	Somewhat agree	Completely agree	Somewhat agree	Somewhat agree	Somewhat agree	Somewhat agree	Somewhat agree	Somewhat agree	Completely agree	Somewhat agree	Somewhat agree	Somewhat disagree	Somewhat agree	Somewhat agree	Neither disagree nor agree	Neither disagree nor agree	Somewhat agree	Somewhat agree	Completely agree	Somewhat agree	Completely agree	Completely agree	Somewhat agree	Somewhat agree	Completely agree	Neither disagree nor agree	I donâ€™t know		Male	26-40	Saudi Arabia	Graduate/higher diploma	Engineering/Math related
2017/02/01 5:21:06 PM GMT+1	More than 12 hours	More than 10 years	Personal Computer/Laptop;Smart phone	Google	More than 6 times	Look for medication for specific disease;Read about medications prescribed by your doctor	At a general search engine such as Google, Bing or Yahoo	Somewhat agree	4-5 links	Completely disagree	Completely agree	Neither disagree nor agree	Completely disagree	Somewhat disagree	Completely disagree	Completely disagree	Somewhat agree	Completely disagree	Neither disagree nor agree	Completely agree	Completely agree	Completely agree	Somewhat disagree	Neither disagree nor agree	Somewhat agree	Neither disagree nor agree	Somewhat agree	Somewhat agree	Completely agree	Completely disagree	Completely agree	Completely agree	Completely agree	Completely agree	Completely agree	Completely agree	I donâ€™t mind if it has both 1 & 2		Male	26-40	Egypt	Graduate/higher diploma	Medical related
2017/02/01 5:23:19 PM GMT+1	2-6 hours	3-5 years	Personal Computer/Laptop;Smart phone	Google	More than 6 times	Look for symptoms and the possible diagnosis;Read about medications prescribed by your doctor	At a general search engine such as Google, Bing or Yahoo	Somewhat disagree	More than 5 links	Somewhat agree	Completely agree	Completely agree	Completely disagree	Completely agree	Somewhat agree	Somewhat agree	Completely agree	Somewhat agree	Completely agree	Completely agree	Completely agree	Completely agree	Completely agree	Completely agree	Completely agree	Somewhat disagree	Completely agree	Somewhat agree	Completely agree	Neither disagree nor agree	Completely agree	Somewhat agree	Somewhat disagree	Completely agree	Somewhat agree	Somewhat disagree	Only alternative medicine (any of a range of medical therapies that are not regarded by medical professionals)		Male	18-25	Saudi Arabia	Graduate/higher diploma	Arts related
2017/02/01 5:25:06 PM GMT+1	2-6 hours	More than 10 years	Personal Computer/Laptop;Tablet;Smart phone	Google	3-5 times	Read more about disease diagnosed by your doctor;Read about medications prescribed by your doctor	At a general search engine such as Google, Bing or Yahoo	Somewhat agree	More than 5 links	Neither disagree nor agree	Somewhat agree	Somewhat agree	Completely agree	Neither disagree nor agree	Somewhat agree	Somewhat agree	Neither disagree nor agree	Neither disagree nor agree	Neither disagree nor agree	Somewhat agree	Somewhat agree	Somewhat agree	Neither disagree nor agree	Somewhat agree	Somewhat agree	Somewhat agree	Neither disagree nor agree	Somewhat agree	Somewhat disagree	Neither disagree nor agree	Neither disagree nor agree	Somewhat agree	Somewhat agree	Somewhat agree	Neither disagree nor agree	Neither disagree nor agree	I donâ€™t know		Male	41-60	Saudi Arabia	Postgraduate	Engineering/Math related
2017/02/01 5:25:26 PM GMT+1	Less than 2 hours	More than 10 years	Smart phone	Google	More than 6 times	Look for symptoms and the possible diagnosis	At a site that specializes in health information, like NHS choices or WebMD (if you use a search engine to reach a specific site select this option)	Somewhat agree	2-3 links	Somewhat agree	Somewhat agree	Somewhat agree	Somewhat agree	Somewhat agree	Somewhat agree	Somewhat agree	Somewhat agree	Somewhat agree	Somewhat agree	Somewhat agree	Somewhat agree	Somewhat agree	Somewhat agree	Somewhat agree	Somewhat agree	Somewhat agree	Somewhat agree	Somewhat agree	Somewhat agree	Somewhat agree	Completely agree	Somewhat agree	Somewhat agree	Somewhat disagree	Somewhat agree	Completely agree	Only alternative medicine (any of a range of medical therapies that are not regarded by medical professionals)		Female	41-60		Graduate/higher diploma	teacher
2017/02/01 5:32:33 PM GMT+1	2-6 hours	More than 10 years	Tablet;Smart phone	Google	3-5 times	Look for symptoms and the possible diagnosis;Read more about disease diagnosed by your doctor	At a more general site like Wikipedia, that contains information on all kinds of topics (if you use a search engine to reach a specific site select this option)	Completely agree	4-5 links	Somewhat agree	Somewhat disagree	Somewhat disagree	Somewhat agree	Somewhat agree	Somewhat agree	Neither disagree nor agree	Neither disagree nor agree	Neither disagree nor agree	Completely disagree	Completely disagree	Completely agree	Completely agree	Completely agree	Completely agree	Completely agree	Completely disagree	Completely agree	Completely agree	Completely agree	Completely agree	Neither disagree nor agree	Completely agree	Completely agree	Completely agree	Completely agree	Neither disagree nor agree	I donâ€™t know		Female	26-40	United Kingdom	Postgraduate
2017/02/01 5:35:51 PM GMT+1	2-6 hours	5-10 years	Personal Computer/Laptop;Smart phone	Google	3-5 times	Look for medication for specific disease;Read more about disease diagnosed by your doctor	At a general search engine such as Google, Bing or Yahoo	Neither disagree nor agree	More than 5 links	Somewhat agree	Neither disagree nor agree	Neither disagree nor agree	Neither disagree nor agree	Neither disagree nor agree	Neither disagree nor agree	Neither disagree nor agree	Neither disagree nor agree	Neither disagree nor agree	Neither disagree nor agree	Neither disagree nor agree	Neither disagree nor agree	Neither disagree nor agree	Neither disagree nor agree	Neither disagree nor agree	Neither disagree nor agree	Neither disagree nor agree	Neither disagree nor agree	Neither disagree nor agree	Neither disagree nor agree	Neither disagree nor agree	Neither disagree nor agree	Neither disagree nor agree	Neither disagree nor agree	Neither disagree nor agree	Neither disagree nor agree	Neither disagree nor agree	I donâ€™t mind if it has both 1 & 2		Male	26-40	United Kingdom	Postgraduate	Law
2017/02/01 6:16:32 PM GMT+1	More than 12 hours	More than 10 years	Personal Computer/Laptop;Tablet;Smart phone	Google	More than 6 times	Look for medication for specific disease;Look for symptoms and the possible diagnosis;Read more about disease diagnosed by your doctor;Read about medications prescribed by your doctor	At a general search engine such as Google, Bing or Yahoo	Completely agree	More than 5 links	Completely agree	Completely agree	Somewhat agree	Somewhat agree	Somewhat agree	Completely agree	Somewhat agree	Neither disagree nor agree	Neither disagree nor agree	Somewhat agree	Completely agree	Completely agree	Completely agree	Completely agree	Completely agree	Completely agree	Neither disagree nor agree	Completely agree	Completely agree	Somewhat agree	Somewhat agree	Neither disagree nor agree	Somewhat agree	Somewhat agree	Completely agree	Completely agree	Neither disagree nor agree	I donâ€™t mind if it has both 1 & 2		Male	41-60		Postgraduate	Medical related
2017/02/01 6:36:53 PM GMT+1	7-12 hours	5-10 years	Personal Computer/Laptop;Tablet;Smart phone	Google	More than 6 times	Look for medication for specific disease;Looking for health information	At a general search engine such as Google, Bing or Yahoo	Somewhat agree	2-3 links	Neither disagree nor agree	Somewhat agree	Somewhat agree	Somewhat agree	Completely agree	Neither disagree nor agree	Neither disagree nor agree	Completely agree	Somewhat disagree	Somewhat agree	Neither disagree nor agree	Somewhat disagree	Somewhat disagree	Neither disagree nor agree	Somewhat agree	Somewhat agree	Neither disagree nor agree	Somewhat agree	Somewhat agree	Somewhat agree	Neither disagree nor agree	Neither disagree nor agree	Somewhat agree	Neither disagree nor agree	Somewhat agree	Somewhat disagree	Somewhat agree	I donâ€™t know		Male	41-60		Postgraduate	Engineering/Math related
2017/02/01 6:51:52 PM GMT+1	2-6 hours	More than 10 years	Smart phone	Google	More than 6 times	Look for medication for specific disease;Look for symptoms and the possible diagnosis;Read more about disease diagnosed by your doctor;Read about medications prescribed by your doctor	At a general search engine such as Google, Bing or Yahoo	Completely agree	More than 5 links	Completely agree	Completely agree	Completely agree	Completely agree	Completely agree	Completely agree	Completely agree	Completely agree	Completely agree	Completely agree	Somewhat agree	Neither disagree nor agree	Somewhat agree	Completely agree	Completely agree	Completely agree	Completely agree	Completely agree	Completely agree	Completely agree	Completely agree	Completely agree	Completely agree	Completely agree	Completely agree	Completely agree	Somewhat agree	I donâ€™t know		Female	26-40	United Kingdom	Graduate/higher diploma	Engineering/Math related
2017/02/01 7:03:02 PM GMT+1	More than 12 hours	More than 10 years	Personal Computer/Laptop;Smart phone;Smart TV	Google;Bing	More than 6 times	Read more about disease diagnosed by your doctor;Read about medications prescribed by your doctor	At a site that specializes in health information, like NHS choices or WebMD (if you use a search engine to reach a specific site select this option)	Neither disagree nor agree	2-3 links	Somewhat disagree	Completely disagree	Somewhat disagree	Somewhat disagree	Somewhat agree	Completely disagree	Somewhat disagree	Somewhat disagree	Somewhat disagree	Somewhat disagree	Completely disagree	Somewhat disagree	Somewhat disagree	Somewhat agree	Completely agree	Completely agree	Neither disagree nor agree	Somewhat disagree	Neither disagree nor agree	Neither disagree nor agree	Neither disagree nor agree	Somewhat agree	Neither disagree nor agree	Neither disagree nor agree	Completely agree	Neither disagree nor agree	Completely agree	I donâ€™t know	First looking for Who is manage the web page if it a famos doctor that is ok for me if any computer technician manage the web site and get information from other site or books that will be sick couz he is not in filed	Male	26-40	Saudi Arabia	Postgraduate	Mangment Information technology
2017/02/01 7:06:05 PM GMT+1	2-6 hours	5-10 years	Personal Computer/Laptop;Tablet;Smart phone	Google	More than 6 times	Look for medication for specific disease;Look for symptoms and the possible diagnosis;Read more about disease diagnosed by your doctor;Read about medications prescribed by your doctor	At a general search engine such as Google, Bing or Yahoo	Somewhat agree	4-5 links	Completely agree	Completely agree	Neither disagree nor agree	Somewhat agree	Somewhat disagree	Neither disagree nor agree	Completely agree	Somewhat disagree	Somewhat agree	Completely agree	Completely agree	Completely agree	Neither disagree nor agree	Neither disagree nor agree	Completely agree	Completely agree	Somewhat agree	Somewhat agree	Completely disagree	Neither disagree nor agree	Somewhat disagree	Completely agree	Completely agree	Somewhat agree	Completely agree	Completely agree	Completely agree	I donâ€™t mind if it has both 1 & 2		Male	26-40	Germany	Postgraduate	Medical related
2017/02/01 7:12:31 PM GMT+1	2-6 hours	More than 10 years	Personal Computer/Laptop;Tablet;Smart phone	Google	More than 6 times	Look for medication for specific disease;Look for symptoms and the possible diagnosis;Read more about disease diagnosed by your doctor;Read about medications prescribed by your doctor	At a general search engine such as Google, Bing or Yahoo	Somewhat agree	More than 5 links	Somewhat agree	Completely agree	Neither disagree nor agree	Somewhat agree	Somewhat agree	Somewhat agree	Neither disagree nor agree	Neither disagree nor agree	Somewhat agree	Somewhat disagree	Somewhat disagree	Somewhat disagree	Somewhat disagree	Completely agree	Completely agree	Somewhat agree	Somewhat disagree	Completely agree	Somewhat agree	Somewhat agree	Somewhat agree	Neither disagree nor agree	Completely agree	Somewhat agree	Neither disagree nor agree	Somewhat agree	Completely agree	Medicine of which the effectiveness was demonstrated scientifically in clinical trials.		Male	26-40	Germany	Postgraduate	Medical related
2017/02/01 7:21:28 PM GMT+1	Less than 2 hours	5-10 years	Personal Computer/Laptop;Smart phone	Google	3-5 times	Look for medication for specific disease;Look for symptoms and the possible diagnosis;Read more about disease diagnosed by your doctor	At a general search engine such as Google, Bing or Yahoo	Somewhat agree	2-3 links	Somewhat agree	Completely agree	Completely agree	Somewhat agree	Somewhat agree	Somewhat agree	Completely agree	Completely agree	Somewhat disagree	Completely agree	Completely agree	Completely agree	Completely agree	Completely agree	Completely agree	Completely agree	Completely disagree	Somewhat agree	Completely disagree	Somewhat agree	Somewhat agree	Completely agree	Somewhat agree	Somewhat agree	Somewhat agree	Completely agree	Somewhat agree	Medicine of which the effectiveness was demonstrated scientifically in clinical trials.		Male	26-40	Yemen	Postgraduate	Medical related
2017/02/01 7:40:36 PM GMT+1	Less than 2 hours	More than 10 years	Personal Computer/Laptop;Smart phone;Smart TV	Google	3-5 times	Look for medication for specific disease	At a general search engine such as Google, Bing or Yahoo	Somewhat agree	4-5 links	Neither disagree nor agree	Somewhat agree	Somewhat agree	Completely agree	Somewhat agree	Somewhat agree	Neither disagree nor agree	Somewhat agree	Somewhat agree	Somewhat agree	Completely agree	Completely agree	Neither disagree nor agree	Completely agree	Completely agree	Completely agree	Completely agree	Completely agree	Completely agree	Somewhat agree	Somewhat agree	Completely agree	Completely agree	Somewhat agree	Somewhat agree	Completely agree	Somewhat agree	I donâ€™t know		Male	26-40	Saudi Arabia	Graduate/higher diploma	Business related
2017/02/01 7:50:20 PM GMT+1	2-6 hours	More than 10 years	Personal Computer/Laptop;Tablet;Smart phone	Google	More than 6 times	Read more about disease diagnosed by your doctor;Read about medications prescribed by your doctor	At a general search engine such as Google, Bing or Yahoo	Somewhat agree	More than 5 links	Completely agree	Completely agree	Somewhat agree	Neither disagree nor agree	Completely agree	Completely agree	Neither disagree nor agree	Neither disagree nor agree	Completely disagree	Neither disagree nor agree	Neither disagree nor agree	Neither disagree nor agree	Completely agree	Somewhat agree	Somewhat agree	Neither disagree nor agree	Somewhat agree	Somewhat agree	Neither disagree nor agree	Neither disagree nor agree	Neither disagree nor agree	Completely agree	Somewhat agree	Somewhat agree	Somewhat agree	Somewhat agree	Somewhat agree	I donâ€™t mind if it has both 1 & 2		Male	18-25	Germany	Postgraduate	Engineering/Math related
2017/02/01 7:52:41 PM GMT+1	2-6 hours	5-10 years	Personal Computer/Laptop;Smart phone	Google	1-2 times	Look for symptoms and the possible diagnosis	At a general search engine such as Google, Bing or Yahoo	Somewhat agree	2-3 links	Somewhat agree	Completely agree	Completely agree	Somewhat agree	Neither disagree nor agree	Somewhat agree	Completely disagree	Somewhat agree	Somewhat agree	Somewhat agree	Somewhat agree	Somewhat agree	Completely agree	Completely agree	Completely agree	Completely agree	Neither disagree nor agree	Completely agree	Somewhat agree	Neither disagree nor agree	Somewhat agree	Completely agree	Completely agree	Completely agree	Completely agree	Completely agree	Completely agree	Medicine of which the effectiveness was demonstrated scientifically in clinical trials.		Male	26-40	Saudi Arabia	Postgraduate	Computer field
2017/02/01 7:59:22 PM GMT+1	2-6 hours	More than 10 years	Personal Computer/Laptop;Smart phone	Google	More than 6 times	Look for medication for specific disease;Look for symptoms and the possible diagnosis;Read more about disease diagnosed by your doctor	At a general search engine such as Google, Bing or Yahoo	Somewhat agree	More than 5 links	Somewhat agree	Somewhat agree	Completely agree	Completely agree	Neither disagree nor agree	Neither disagree nor agree	Completely agree	Somewhat agree	Somewhat agree	Somewhat disagree	Neither disagree nor agree	Somewhat agree	Somewhat agree	Somewhat agree	Completely agree	Somewhat agree	Somewhat disagree	Somewhat agree	Completely agree	Somewhat agree	Neither disagree nor agree	Completely agree	Completely agree	Somewhat agree	Completely agree	Somewhat agree	Somewhat disagree	I donâ€™t mind if it has both 1 & 2		Male	26-40	Oman	Postgraduate	Information Technology
2017/02/01 8:08:42 PM GMT+1	More than 12 hours	More than 10 years	Personal Computer/Laptop;Tablet	Google	More than 6 times	Look for medication for specific disease	At a general search engine such as Google, Bing or Yahoo	Somewhat disagree	More than 5 links	Completely disagree	Completely agree	Somewhat agree	Somewhat agree	Somewhat agree	Somewhat agree	Somewhat agree	Somewhat agree	Somewhat agree	Neither disagree nor agree	Neither disagree nor agree	Neither disagree nor agree	Somewhat agree	Completely agree	Completely agree	Completely agree	Somewhat agree	Completely agree	Somewhat agree	Neither disagree nor agree	Neither disagree nor agree	Completely agree	Somewhat agree	Completely agree	Completely agree	Completely agree	Completely agree	I donâ€™t know		Male	26-40		Postgraduate	Engineering/Math related
2017/02/01 8:36:25 PM GMT+1	2-6 hours	More than 10 years	Personal Computer/Laptop;Smart phone;Smart TV	Google	More than 6 times	Look for medication for specific disease;Look for symptoms and the possible diagnosis;Read more about disease diagnosed by your doctor;Read about medications prescribed by your doctor	At a general search engine such as Google, Bing or Yahoo	Neither disagree nor agree	2-3 links	Completely agree	Completely agree	Completely agree	Somewhat agree	Completely agree	Somewhat agree	Completely agree	Completely agree	Completely agree	Neither disagree nor agree	Completely agree	Completely agree	Neither disagree nor agree	Completely agree	Completely agree	Completely agree	Completely agree	Completely agree	Completely agree	Completely agree	Completely agree	Completely agree	Completely agree	Completely agree	Completely agree	Completely agree	Completely agree	I donâ€™t mind if it has both 1 & 2		Male	26-40	United Kingdom	High school	Business related
2017/02/01 8:54:28 PM GMT+1	More than 12 hours	5-10 years	Personal Computer/Laptop;Smart phone	Google	More than 6 times	Look for medication for specific disease;Look for symptoms and the possible diagnosis;Read more about disease diagnosed by your doctor;Read about medications prescribed by your doctor	At a general search engine such as Google, Bing or Yahoo	Somewhat agree	More than 5 links	Somewhat agree	Neither disagree nor agree	Somewhat disagree	Completely agree	Completely disagree	Somewhat disagree	Neither disagree nor agree	Completely disagree	Completely disagree	Somewhat agree	Completely agree	Completely agree	Somewhat disagree	Somewhat agree	Completely agree	Completely agree	Completely agree	Completely agree	Completely disagree	Completely agree	Completely disagree	Completely agree	Completely agree	Completely agree	Completely agree	Somewhat agree	Neither disagree nor agree	Medicine of which the effectiveness was demonstrated scientifically in clinical trials.		Male	26-40	Austria	Graduate/higher diploma	Computer Science
2017/02/01 8:58:28 PM GMT+1	7-12 hours	3-5 years	Personal Computer/Laptop;Smart phone	Google	1-2 times	Look for symptoms and the possible diagnosis	At a general search engine such as Google, Bing or Yahoo	Neither disagree nor agree	2-3 links	Somewhat agree	Somewhat agree	Completely agree	Completely agree	Somewhat agree	Neither disagree nor agree	Somewhat agree	Neither disagree nor agree	Neither disagree nor agree	Somewhat agree	Completely agree	Somewhat agree	Completely agree	Completely agree	Completely agree	Completely agree	Somewhat agree	Completely agree	Neither disagree nor agree	Neither disagree nor agree	Neither disagree nor agree	Somewhat agree	Somewhat agree	Somewhat agree	Somewhat agree	Somewhat agree	Completely agree	I donâ€™t know		Male	26-40	Yemen	Graduate/higher diploma
2017/02/01 8:58:31 PM GMT+1	More than 12 hours	More than 10 years	Personal Computer/Laptop;Smart phone	Google	More than 6 times	Look for medication for specific disease;Look for symptoms and the possible diagnosis;Read more about disease diagnosed by your doctor	At a general search engine such as Google, Bing or Yahoo	Somewhat agree	More than 5 links	Completely agree	Completely agree	Completely agree	Somewhat agree	Completely agree	Completely agree	Completely agree	Completely agree	Completely agree	Neither disagree nor agree	Completely agree	Completely agree	Completely agree	Completely agree	Completely agree	Completely agree	Somewhat agree	Somewhat agree	Neither disagree nor agree	Neither disagree nor agree	Neither disagree nor agree	Completely agree	Completely agree	Somewhat agree	Neither disagree nor agree	Completely agree	Completely agree	I donâ€™t mind if it has both 1 & 2		Female	26-40	Germany	Postgraduate	Marine Microbiology
2017/02/01 9:09:57 PM GMT+1	More than 12 hours	More than 10 years	Personal Computer/Laptop;Tablet;Smart phone	Google	More than 6 times	Look for medication for specific disease;Read more about disease diagnosed by your doctor;Read about medications prescribed by your doctor	At a general search engine such as Google, Bing or Yahoo	Somewhat agree	2-3 links	Neither disagree nor agree	Neither disagree nor agree	Somewhat agree	Somewhat agree	Somewhat agree	Neither disagree nor agree	Somewhat agree	Neither disagree nor agree	Somewhat disagree	Somewhat disagree	Neither disagree nor agree	Neither disagree nor agree	Neither disagree nor agree	Neither disagree nor agree	Somewhat agree	Somewhat agree	Somewhat agree	Somewhat agree	Neither disagree nor agree	Somewhat agree	Neither disagree nor agree	Completely disagree	Somewhat agree	Somewhat agree	Somewhat agree	Completely agree	Completely agree	I donâ€™t know		Male	26-40	Saudi Arabia	Postgraduate	Engineering/Math related
2017/02/01 9:13:49 PM GMT+1	2-6 hours	3-5 years	Tablet;Smart phone;Smart TV	Google	1-2 times	Read more about disease diagnosed by your doctor	At a general search engine such as Google, Bing or Yahoo	Neither disagree nor agree	2-3 links	Somewhat agree	Completely agree	Somewhat agree	Somewhat agree	Somewhat agree	Completely agree	Somewhat agree	Neither disagree nor agree	Somewhat agree	Completely agree	Completely agree	Completely agree	Completely agree	Somewhat agree	Completely agree	Completely agree	Somewhat agree	Somewhat disagree	Neither disagree nor agree	Somewhat agree	Somewhat agree	Completely agree	Completely agree	Completely agree	Completely agree	Completely agree	Neither disagree nor agree	Medicine of which the effectiveness was demonstrated scientifically in clinical trials.		Female	41-60	United Kingdom	High school
2017/02/01 9:13:50 PM GMT+1	2-6 hours	5-10 years	Personal Computer/Laptop;Smart phone	Google	More than 6 times	Look for symptoms and the possible diagnosis;Read more about disease diagnosed by your doctor;Read about medications prescribed by your doctor	At a general search engine such as Google, Bing or Yahoo	Somewhat agree	2-3 links	Neither disagree nor agree	Somewhat agree	Neither disagree nor agree	Somewhat agree	Somewhat disagree	Somewhat agree	Somewhat agree	Completely agree	Neither disagree nor agree	Somewhat agree	Completely agree	Completely agree	Completely agree	Somewhat agree	Completely agree	Completely agree	Somewhat agree	Somewhat agree	Somewhat agree	Completely agree	Completely disagree	Completely agree	Somewhat agree	Somewhat agree	Somewhat agree	Somewhat agree	Completely agree	Only alternative medicine (any of a range of medical therapies that are not regarded by medical professionals)		Male	18-25	United Kingdom	Graduate/higher diploma	Medical related
2017/02/01 9:13:55 PM GMT+1	More than 12 hours	More than 10 years	Personal Computer/Laptop;Tablet;Smart phone	Google;Yahoo!	More than 6 times	Look for medication for specific disease;Look for symptoms and the possible diagnosis;Read more about disease diagnosed by your doctor;Read about medications prescribed by your doctor	At a site that specializes in health information, like NHS choices or WebMD (if you use a search engine to reach a specific site select this option)	Somewhat agree	More than 5 links	Completely agree	Completely agree	Completely agree	Completely agree	Completely agree	Completely agree	Somewhat agree	Somewhat agree	Somewhat agree	Somewhat agree	Completely agree	Somewhat agree	Completely agree	Completely agree	Somewhat agree	Completely agree	Neither disagree nor agree	Completely agree	Completely agree	Completely agree	Neither disagree nor agree	Somewhat agree	Completely agree	Completely agree	Completely agree	Completely agree	Completely agree	Medicine of which the effectiveness was demonstrated scientifically in clinical trials.	Some of questions need to be multiple choice.	Male	26-40	Libya	Postgraduate	Medical related
2017/02/01 9:28:39 PM GMT+1	2-6 hours	More than 10 years	Personal Computer/Laptop;Smart phone	Google	3-5 times	Look for medication for specific disease;Read about medications prescribed by your doctor	At a general search engine such as Google, Bing or Yahoo	Neither disagree nor agree	2-3 links	Somewhat agree	Somewhat agree	Somewhat agree	Somewhat agree	Somewhat agree	Completely agree	Somewhat agree	Somewhat agree	Somewhat agree	Completely agree	Completely agree	Completely agree	Completely agree	Completely agree	Completely agree	Completely agree	Somewhat agree	Completely agree	Neither disagree nor agree	Somewhat agree	Neither disagree nor agree	Completely agree	Somewhat agree	Somewhat agree	Somewhat agree	Somewhat agree	Somewhat agree	I donâ€™t mind if it has both 1 & 2		Female	18-25	Ireland {Republic}	Postgraduate	Medical related
2017/02/01 9:29:18 PM GMT+1	2-6 hours	Less than 3 years	Personal Computer/Laptop	Google	3-5 times	Look for medication for specific disease;Look for symptoms and the possible diagnosis;Read about medications prescribed by your doctor	At a general search engine such as Google, Bing or Yahoo	Neither disagree nor agree	More than 5 links	Somewhat agree	Somewhat agree	Neither disagree nor agree	Somewhat agree	Neither disagree nor agree	Somewhat disagree	Neither disagree nor agree	Neither disagree nor agree	Somewhat disagree	Somewhat disagree	Somewhat disagree	Somewhat disagree	Somewhat agree	Somewhat agree	Somewhat agree	Somewhat agree	Somewhat agree	Somewhat agree	Somewhat agree	Neither disagree nor agree	Neither disagree nor agree	Somewhat agree	Somewhat agree	Somewhat agree	Somewhat agree	Somewhat agree	Somewhat agree	Medicine of which the effectiveness was demonstrated scientifically in clinical trials.		Male	26-40	Yemen	Graduate/higher diploma	Computer Science
2017/02/01 9:36:34 PM GMT+1	More than 12 hours	More than 10 years	Personal Computer/Laptop	Google	3-5 times	Read more about disease diagnosed by your doctor	At a general search engine such as Google, Bing or Yahoo	Somewhat agree	More than 5 links	Somewhat disagree	Somewhat agree	Somewhat agree	Somewhat agree	Somewhat agree	Somewhat disagree	Somewhat agree	Somewhat agree	Somewhat disagree	Somewhat agree	Somewhat agree	Neither disagree nor agree	Somewhat disagree	Neither disagree nor agree	Somewhat disagree	Somewhat disagree	Somewhat disagree	Somewhat agree	Neither disagree nor agree	Somewhat disagree	Somewhat disagree	Somewhat agree	Somewhat agree	Somewhat agree	Somewhat agree	Somewhat agree	Somewhat disagree	Only alternative medicine (any of a range of medical therapies that are not regarded by medical professionals)		Male	26-40	Saudi Arabia	Postgraduate	Engineering/Math related
2017/02/01 9:44:40 PM GMT+1	More than 12 hours	5-10 years	Personal Computer/Laptop;Tablet;Smart phone	Google	More than 6 times	Look for medication for specific disease;Look for symptoms and the possible diagnosis;Read more about disease diagnosed by your doctor;Read about medications prescribed by your doctor	At a general search engine such as Google, Bing or Yahoo	Somewhat agree	4-5 links	Somewhat agree	Completely agree	Somewhat agree	Completely agree	Neither disagree nor agree	Completely agree	Somewhat agree	Somewhat agree	Neither disagree nor agree	Completely agree	Somewhat agree	Somewhat agree	Completely agree	Completely agree	Completely agree	Completely agree	Neither disagree nor agree	Completely agree	Completely agree	Somewhat agree	Neither disagree nor agree	Completely agree	Completely agree	Completely agree	Completely agree	Completely agree	Completely agree	Medicine of which the effectiveness was demonstrated scientifically in clinical trials.		Male	26-40	United Kingdom	Postgraduate	Medical related
2017/02/01 9:51:50 PM GMT+1	7-12 hours	More than 10 years	Personal Computer/Laptop;Smart phone	Google	More than 6 times	Look for medication for specific disease;Look for symptoms and the possible diagnosis;Read about medications prescribed by your doctor	At a general search engine such as Google, Bing or Yahoo	Neither disagree nor agree	More than 5 links	Completely agree	Completely agree	Completely agree	Completely agree	Somewhat agree	Completely agree	Neither disagree nor agree	Neither disagree nor agree	Somewhat agree	Somewhat agree	Somewhat agree	Somewhat agree	Somewhat disagree	Neither disagree nor agree	Completely agree	Completely agree	Somewhat disagree	Completely agree	Somewhat agree	Somewhat disagree	Neither disagree nor agree	Somewhat agree	Completely agree	Completely agree	Completely agree	Completely agree	Somewhat disagree	I donâ€™t know		Male	26-40	Saudi Arabia	Postgraduate	Computer science
2017/02/01 10:04:25 PM GMT+1	7-12 hours	5-10 years	Personal Computer/Laptop;Smart phone	Google;Bing;Yahoo!	More than 6 times	Look for symptoms and the possible diagnosis;Read more about disease diagnosed by your doctor	At a site that specializes in health information, like NHS choices or WebMD (if you use a search engine to reach a specific site select this option)	Somewhat agree	2-3 links	Somewhat agree	Somewhat agree	Neither disagree nor agree	Neither disagree nor agree	Somewhat disagree	Somewhat disagree	Somewhat disagree	Neither disagree nor agree	Somewhat disagree	Completely disagree	Neither disagree nor agree	Neither disagree nor agree	Neither disagree nor agree	Neither disagree nor agree	Somewhat agree	Somewhat agree	Somewhat disagree	Completely disagree	Somewhat disagree	Somewhat agree	Neither disagree nor agree	Completely agree	Completely agree	Completely agree	Completely agree	Completely agree	Completely disagree	I donâ€™t know		Male	26-40	United Kingdom	Postgraduate	Sciences
2017/02/01 10:25:37 PM GMT+1	2-6 hours	5-10 years	Personal Computer/Laptop;Smart phone	Google	More than 6 times	Look for medication for specific disease;Look for symptoms and the possible diagnosis	At a general search engine such as Google, Bing or Yahoo	Somewhat agree	2-3 links	Neither disagree nor agree	Somewhat agree	Somewhat agree	Neither disagree nor agree	Neither disagree nor agree	Neither disagree nor agree	Somewhat agree	Somewhat agree	Completely disagree	Completely agree	Completely agree	Completely agree	Completely agree	Somewhat agree	Completely agree	Completely agree	Completely agree	Somewhat agree	Neither disagree nor agree	Completely disagree	Somewhat agree	Neither disagree nor agree	Completely agree	Completely agree	Somewhat agree	Somewhat agree	Completely agree	Only alternative medicine (any of a range of medical therapies that are not regarded by medical professionals)		Female	18-25	Turkey	Graduate/higher diploma	Medical related
2017/02/01 10:37:16 PM GMT+1	2-6 hours	Less than 3 years	Personal Computer/Laptop;Smart phone	Google	More than 6 times	Look for medication for specific disease;Look for symptoms and the possible diagnosis	At a site that specializes in health information, like NHS choices or WebMD (if you use a search engine to reach a specific site select this option)	Somewhat agree	More than 5 links	Somewhat agree	Somewhat agree	Somewhat agree	Somewhat agree	Somewhat agree	Completely agree	Somewhat agree	Somewhat agree	Completely disagree	Completely disagree	Completely agree	Completely agree	Completely agree	Completely agree	Completely agree	Completely agree	Somewhat agree	Completely agree	Somewhat disagree	Somewhat agree	Somewhat disagree	Completely agree	Completely agree	Completely agree	Completely agree	Completely agree	Completely agree	Medicine of which the effectiveness was demonstrated scientifically in clinical trials.	Well done .. you cover everything ..	Male	26-40	United Kingdom	Postgraduate	Business related
2017/02/01 10:40:58 PM GMT+1	More than 12 hours	5-10 years	Smart phone	Google	More than 6 times	Look for symptoms and the possible diagnosis	At a general search engine such as Google, Bing or Yahoo	Somewhat agree	2-3 links	Somewhat agree	Somewhat disagree	Somewhat disagree	Somewhat agree	Somewhat disagree	Somewhat disagree	Somewhat disagree	Somewhat disagree	Somewhat agree	Somewhat agree	Somewhat agree	Neither disagree nor agree	Neither disagree nor agree	Somewhat agree	Somewhat agree	Completely agree	Completely agree	Completely agree	Somewhat agree	Somewhat agree	Neither disagree nor agree	Completely agree	Completely agree	Somewhat agree	Neither disagree nor agree	Somewhat agree	Somewhat agree	I donâ€™t mind if it has both 1 & 2		Male	26-40	Germany	Postgraduate	Medical related
2017/02/01 10:52:21 PM GMT+1	7-12 hours	3-5 years	Personal Computer/Laptop;Smart phone	Google	3-5 times	Look for symptoms and the possible diagnosis;Read about medications prescribed by your doctor	At a site that specializes in health information, like NHS choices or WebMD (if you use a search engine to reach a specific site select this option)	Somewhat disagree	2-3 links	Completely agree	Somewhat agree	Somewhat agree	Completely agree	Completely agree	Completely agree	Somewhat agree	Somewhat agree	Somewhat agree	Neither disagree nor agree	Completely agree	Completely agree	Completely agree	Somewhat agree	Somewhat agree	Completely agree	Completely agree	Completely agree	Completely agree	Somewhat agree	Completely agree	Completely agree	Completely agree	Completely agree	Completely agree	Completely agree	Completely agree	Medicine of which the effectiveness was demonstrated scientifically in clinical trials.		Female	41-60	United Kingdom	Graduate/higher diploma
2017/02/01 10:59:09 PM GMT+1	2-6 hours	5-10 years	Smart phone	Google	More than 6 times	Look for symptoms and the possible diagnosis;Read more about disease diagnosed by your doctor	At a general search engine such as Google, Bing or Yahoo	Somewhat agree	More than 5 links	Completely agree	Somewhat agree	Somewhat agree	Completely agree	Completely disagree	Neither disagree nor agree	Completely agree	Somewhat agree	Completely disagree	Completely disagree	Completely agree	Completely agree	Somewhat agree	Somewhat agree	Completely agree	Somewhat agree	Somewhat disagree	Completely agree	Neither disagree nor agree	Somewhat agree	Somewhat agree	Neither disagree nor agree	Completely agree	Somewhat agree	Somewhat agree	Somewhat agree	Completely agree	Medicine of which the effectiveness was demonstrated scientifically in clinical trials.		Female	18-25	United Kingdom	High school	Engineering/Math related
2017/02/01 11:03:33 PM GMT+1	2-6 hours	More than 10 years	Personal Computer/Laptop;Tablet;Smart phone	Google	3-5 times	Look for medication for specific disease	At a general search engine such as Google, Bing or Yahoo	Somewhat disagree	4-5 links	Somewhat agree	Completely agree	Somewhat disagree	Neither disagree nor agree	Completely agree	Neither disagree nor agree	Completely agree	Neither disagree nor agree	Somewhat agree	Somewhat agree	Somewhat agree	Somewhat agree	Neither disagree nor agree	Neither disagree nor agree	Neither disagree nor agree	Neither disagree nor agree	Neither disagree nor agree	Neither disagree nor agree	Somewhat agree	Neither disagree nor agree	Somewhat agree	Completely agree	Neither disagree nor agree	Neither disagree nor agree	Neither disagree nor agree	Neither disagree nor agree	Somewhat agree	I donâ€™t know		Male	26-40	Saudi Arabia	Graduate/higher diploma	Engineering/Math related
2017/02/01 11:54:30 PM GMT+1	7-12 hours	More than 10 years	Personal Computer/Laptop;Smart phone	Google	More than 6 times	Look for symptoms and the possible diagnosis;Read more about disease diagnosed by your doctor	At a general search engine such as Google, Bing or Yahoo	Somewhat agree	More than 5 links	Neither disagree nor agree	Somewhat agree	Neither disagree nor agree	Somewhat agree	Somewhat agree	Somewhat agree	Somewhat agree	Somewhat agree	Neither disagree nor agree	Neither disagree nor agree	Somewhat agree	Completely agree	Somewhat agree	Completely agree	Completely agree	Completely agree	Neither disagree nor agree	Completely agree	Somewhat agree	Somewhat agree	Somewhat agree	Neither disagree nor agree	Completely agree	Completely agree	Completely agree	Completely agree	Completely agree	I donâ€™t mind if it has both 1 & 2		Male	26-40	Malaysia	Postgraduate	Computer networking
2017/02/02 12:40:35 AM GMT+1	2-6 hours	5-10 years	Personal Computer/Laptop;Tablet;Smart phone	Google	1-2 times	Look for medication for specific disease;Look for symptoms and the possible diagnosis;Read about medications prescribed by your doctor	At a general search engine such as Google, Bing or Yahoo	Somewhat agree	More than 5 links	Somewhat agree	Neither disagree nor agree	Neither disagree nor agree	Neither disagree nor agree	Neither disagree nor agree	Neither disagree nor agree	Neither disagree nor agree	Neither disagree nor agree	Neither disagree nor agree	Completely agree	Completely agree	Completely agree	Completely agree	Completely agree	Completely agree	Completely agree	Somewhat agree	Somewhat agree	Completely agree	Completely agree	Neither disagree nor agree	Somewhat agree	Completely agree	Completely agree	Completely agree	Completely agree	Completely agree	I donâ€™t mind if it has both 1 & 2		Male	18-25	Yemen	Graduate/higher diploma	Computer science
2017/02/02 2:18:27 AM GMT+1	Less than 2 hours	More than 10 years	Personal Computer/Laptop;Tablet;Smart phone	Google	More than 6 times	Look for symptoms and the possible diagnosis;Read more about disease diagnosed by your doctor	At a site that specializes in health information, like NHS choices or WebMD (if you use a search engine to reach a specific site select this option)	Somewhat agree	2-3 links	Neither disagree nor agree	Completely agree	Neither disagree nor agree	Completely agree	Neither disagree nor agree	Somewhat agree	Neither disagree nor agree	Neither disagree nor agree	Somewhat disagree	Neither disagree nor agree	Somewhat agree	Somewhat agree	Completely agree	Somewhat agree	Completely agree	Completely agree	Somewhat agree	Somewhat agree	Neither disagree nor agree	Somewhat agree	Neither disagree nor agree	Somewhat agree	Completely agree	Somewhat agree	Neither disagree nor agree	Somewhat agree	Neither disagree nor agree	I donâ€™t mind if it has both 1 & 2		Male	26-40	United Kingdom	Postgraduate	Computer Science
2017/02/02 2:25:51 AM GMT+1	More than 12 hours	More than 10 years	Personal Computer/Laptop;Tablet	Google	More than 6 times	Look for medication for specific disease;Read more about disease diagnosed by your doctor;Read about medications prescribed by your doctor	At a general search engine such as Google, Bing or Yahoo	Somewhat agree	More than 5 links	Somewhat agree	Somewhat agree	Somewhat agree	Somewhat agree	Somewhat agree	Neither disagree nor agree	Neither disagree nor agree	Neither disagree nor agree	Neither disagree nor agree	Completely disagree	Completely disagree	Completely disagree	Completely disagree	Completely disagree	Completely agree	Completely agree	Completely agree	Completely agree	Completely disagree	Neither disagree nor agree	Neither disagree nor agree	Completely agree	Completely agree	Completely agree	Completely agree	Completely agree	Neither disagree nor agree	I donâ€™t know		Male	26-40	United Kingdom	Postgraduate	General management
2017/02/02 3:23:26 AM GMT+1	Less than 2 hours	More than 10 years	Personal Computer/Laptop;Smart phone	Google	1-2 times	Look for symptoms and the possible diagnosis	At a general search engine such as Google, Bing or Yahoo	Neither disagree nor agree	2-3 links	Somewhat agree	Somewhat agree	Neither disagree nor agree	Somewhat agree	Somewhat agree	Somewhat agree	Neither disagree nor agree	Somewhat agree	Neither disagree nor agree	Neither disagree nor agree	Neither disagree nor agree	Neither disagree nor agree	Somewhat agree	Neither disagree nor agree	Completely agree	Somewhat agree	Somewhat agree	Somewhat disagree	Completely disagree	Somewhat agree	Neither disagree nor agree	Somewhat disagree	Somewhat agree	Somewhat agree	Somewhat agree	Somewhat agree	Completely disagree	I donâ€™t know		Female	18-25	Saudi Arabia	Graduate/higher diploma	Medical related
2017/02/02 4:33:38 AM GMT+1	More than 12 hours	5-10 years	Smart phone	Google	More than 6 times	I never seek health information online	At a general search engine such as Google, Bing or Yahoo	Neither disagree nor agree	More than 5 links	Somewhat agree	Somewhat agree	Somewhat disagree	Neither disagree nor agree	Somewhat agree	Neither disagree nor agree	Completely disagree	Completely disagree	Neither disagree nor agree	Neither disagree nor agree	Neither disagree nor agree	Neither disagree nor agree	Somewhat agree	Neither disagree nor agree	Neither disagree nor agree	Neither disagree nor agree	Neither disagree nor agree	Somewhat disagree	Somewhat agree	Completely agree	Somewhat agree	Completely agree	Somewhat agree	Somewhat agree	Somewhat disagree	Somewhat agree	Somewhat agree	I donâ€™t mind if it has both 1 & 2	U should right it by more than one language	Male	26-40	Yemen	Postgraduate	Commercial law
2017/02/02 5:25:58 AM GMT+1	7-12 hours	More than 10 years	Personal Computer/Laptop;Tablet;Smart phone	Google	More than 6 times	Look for medication for specific disease;Look for symptoms and the possible diagnosis;Read about medications prescribed by your doctor	At a general search engine such as Google, Bing or Yahoo	Somewhat agree	2-3 links	Somewhat agree	Somewhat agree	Somewhat agree	Somewhat agree	Neither disagree nor agree	Somewhat agree	Somewhat agree	Neither disagree nor agree	Neither disagree nor agree	Neither disagree nor agree	Somewhat agree	Somewhat agree	Somewhat agree	Completely agree	Completely agree	Completely agree	Neither disagree nor agree	Somewhat agree	Completely disagree	Somewhat agree	Somewhat disagree	Completely agree	Somewhat agree	Somewhat agree	Somewhat agree	Somewhat agree	Neither disagree nor agree	Medicine of which the effectiveness was demonstrated scientifically in clinical trials.		Male	26-40	Yemen	Postgraduate	Engineering/Math related
2017/02/02 5:56:01 AM GMT+1	More than 12 hours	More than 10 years	Personal Computer/Laptop;Tablet;Smart phone	Google;Bing	More than 6 times	Look for symptoms and the possible diagnosis;Read more about disease diagnosed by your doctor;Read about medications prescribed by your doctor	At a site that specializes in health information, like NHS choices or WebMD (if you use a search engine to reach a specific site select this option)	Somewhat disagree	4-5 links	Somewhat agree	Completely agree	Somewhat agree	Somewhat agree	Somewhat agree	Somewhat agree	Somewhat agree	Somewhat agree	Somewhat agree	Neither disagree nor agree	Somewhat disagree	Somewhat agree	Somewhat agree	Completely agree	Somewhat agree	Completely agree	Somewhat agree	Completely agree	Somewhat agree	Completely agree	Completely agree	Completely agree	Completely agree	Somewhat agree	Somewhat agree	Somewhat agree	Completely agree	Medicine of which the effectiveness was demonstrated scientifically in clinical trials.		Male	26-40	India	Postgraduate	Engineering/Math related
2017/02/02 6:04:13 AM GMT+1	Less than 2 hours	5-10 years	Personal Computer/Laptop	Google	3-5 times	Look for medication for specific disease	At a site that specializes in health information, like NHS choices or WebMD (if you use a search engine to reach a specific site select this option)	Somewhat disagree	2-3 links	Somewhat disagree	Completely agree	Completely agree	Completely agree	Somewhat agree	Completely agree	Somewhat disagree	Somewhat agree	Somewhat disagree	Neither disagree nor agree	Completely agree	Completely agree	Somewhat agree	Neither disagree nor agree	Completely disagree	Completely disagree	Neither disagree nor agree	Completely disagree	Somewhat agree	Somewhat disagree	Neither disagree nor agree	Completely disagree	Somewhat agree	Somewhat disagree	Completely agree	Completely agree	Neither disagree nor agree	I donâ€™t mind if it has both 1 & 2	Free downlaodable medical books are relaible and helpful in terms of lack of references in Yemen	Male	18-25	Yemen	Graduate/higher diploma	Medical related
2017/02/02 6:20:08 AM GMT+1	7-12 hours	5-10 years	Personal Computer/Laptop;Smart phone	Google	More than 6 times	Look for medication for specific disease;Look for symptoms and the possible diagnosis;Read more about disease diagnosed by your doctor;Read about medications prescribed by your doctor	At a site that specializes in health information, like NHS choices or WebMD (if you use a search engine to reach a specific site select this option)	Neither disagree nor agree	2-3 links	Completely agree	Neither disagree nor agree	Somewhat agree	Neither disagree nor agree	Neither disagree nor agree	Neither disagree nor agree	Somewhat agree	Neither disagree nor agree	Somewhat disagree	Somewhat agree	Completely agree	Somewhat agree	Neither disagree nor agree	Neither disagree nor agree	Completely agree	Completely agree	Somewhat disagree	Completely agree	Completely disagree	Neither disagree nor agree	Somewhat agree	Somewhat agree	Somewhat agree	Somewhat agree	Completely agree	Completely agree	Somewhat disagree	I donâ€™t mind if it has both 1 & 2		Female	18-25	Yemen	Graduate/higher diploma	Medical related
2017/02/02 7:05:49 AM GMT+1	Less than 2 hours	More than 10 years	Personal Computer/Laptop	Google	More than 6 times	Read more about disease diagnosed by your doctor;Read about medications prescribed by your doctor	At a general search engine such as Google, Bing or Yahoo	Somewhat disagree	More than 5 links	Somewhat agree	Somewhat agree	Somewhat agree	Somewhat agree	Somewhat agree	Somewhat agree	Somewhat agree	Somewhat agree	Completely agree	Somewhat agree	Completely disagree	Somewhat agree	Neither disagree nor agree	Somewhat agree	Completely agree	Completely agree	Somewhat agree	Completely agree	Completely agree	Completely agree	Completely agree	Somewhat agree	Somewhat agree	Completely agree	Completely agree	Completely agree	Somewhat agree	I donâ€™t mind if it has both 1 & 2		Male	26-40	Egypt	Postgraduate	Engineering/Math related
2017/02/02 8:43:36 AM GMT+1	2-6 hours	More than 10 years	Personal Computer/Laptop;Smart phone	Google	3-5 times	Look for medication for specific disease;Read more about disease diagnosed by your doctor	At a general search engine such as Google, Bing or Yahoo	Somewhat agree	2-3 links	Completely agree	Completely agree	Completely agree	Completely agree	Somewhat agree	Completely agree	Completely disagree	Somewhat agree	Somewhat agree	Somewhat agree	Completely agree	Somewhat disagree	Somewhat agree	Somewhat agree	Somewhat agree	Completely agree	Somewhat agree	Completely agree	Somewhat agree	Somewhat agree	Somewhat agree	Completely agree	Completely agree	Somewhat agree	Completely agree	Completely agree	Completely agree	I donâ€™t know		Male	26-40	Yemen	Graduate/higher diploma	Engineering/Math related
2017/02/02 8:50:37 AM GMT+1	Less than 2 hours	More than 10 years	Tablet;Smart phone	Google	1-2 times	Look for symptoms and the possible diagnosis	At a general search engine such as Google, Bing or Yahoo	Somewhat disagree	2-3 links	Somewhat disagree	Somewhat agree	Somewhat disagree	Somewhat disagree	Somewhat disagree	Somewhat disagree	Somewhat agree	Somewhat disagree	Somewhat disagree	Somewhat disagree	Somewhat disagree	Somewhat disagree	Neither disagree nor agree	Somewhat disagree	Completely agree	Completely agree	Completely agree	Somewhat agree	Somewhat disagree	Completely agree	Completely disagree	Completely agree	Completely agree	Completely agree	Completely agree	Completely agree	Completely agree	Medicine of which the effectiveness was demonstrated scientifically in clinical trials.		Female	18-25	United Kingdom	Postgraduate	Medical related
2017/02/02 9:40:38 AM GMT+1	7-12 hours	3-5 years	Smart phone	Google	More than 6 times	Look for symptoms and the possible diagnosis;Read more about disease diagnosed by your doctor;Read about medications prescribed by your doctor	At a general search engine such as Google, Bing or Yahoo	Somewhat agree	2-3 links	Somewhat agree	Somewhat agree	Somewhat agree	Somewhat agree	Somewhat agree	Neither disagree nor agree	Somewhat agree	Somewhat agree	Somewhat disagree	Completely agree	Completely agree	Completely agree	Completely agree	Completely agree	Completely agree	Somewhat agree	Somewhat agree	Completely agree	Somewhat agree	Somewhat agree	Somewhat agree	Completely agree	Completely agree	Completely agree	Completely agree	Completely agree	Completely agree	I donâ€™t mind if it has both 1 & 2		Female	18-25	Yemen	Postgraduate
2017/02/02 9:50:57 AM GMT+1	7-12 hours	5-10 years	Smart phone	Google	More than 6 times	Look for medication for specific disease;Look for symptoms and the possible diagnosis;Read more about disease diagnosed by your doctor;Read about medications prescribed by your doctor	At a general search engine such as Google, Bing or Yahoo	Neither disagree nor agree	2-3 links	Completely agree	Completely agree	Somewhat agree	Neither disagree nor agree	Somewhat agree	Completely disagree	Neither disagree nor agree	Completely agree	Somewhat agree	Completely agree	Completely agree	Completely agree	Somewhat agree	Somewhat agree	Completely agree	Completely agree	Completely agree	Completely agree	Completely disagree	Completely agree	Completely agree	Completely agree	Completely agree	Completely agree	Completely agree	Completely agree	Neither disagree nor agree	I donâ€™t mind if it has both 1 & 2		Female	18-25		Graduate/higher diploma	Medical related
2017/02/02 10:09:11 AM GMT+1	7-12 hours	More than 10 years	Personal Computer/Laptop;Smart phone	Google	More than 6 times	Look for medication for specific disease;Look for symptoms and the possible diagnosis;Look for natural medication	At a general search engine such as Google, Bing or Yahoo	Somewhat agree	2-3 links	Completely agree	Completely agree	Neither disagree nor agree	Neither disagree nor agree	Neither disagree nor agree	Neither disagree nor agree	Neither disagree nor agree	Neither disagree nor agree	Neither disagree nor agree	Neither disagree nor agree	Neither disagree nor agree	Neither disagree nor agree	Somewhat disagree	Neither disagree nor agree	Completely agree	Completely agree	Somewhat agree	Somewhat agree	Neither disagree nor agree	Somewhat agree	Somewhat agree	Somewhat agree	Somewhat agree	Somewhat agree	Somewhat agree	Somewhat agree	Neither disagree nor agree	I donâ€™t know		Male	26-40	Yemen	High school	Engineering/Math related
2017/02/02 10:38:17 AM GMT+1	7-12 hours	5-10 years	Personal Computer/Laptop;Smart phone	Google	1-2 times	Read more about disease diagnosed by your doctor	At a general search engine such as Google, Bing or Yahoo	Somewhat agree	More than 5 links	Neither disagree nor agree	Neither disagree nor agree	Neither disagree nor agree	Neither disagree nor agree	Neither disagree nor agree	Neither disagree nor agree	Neither disagree nor agree	Somewhat agree	Somewhat agree	Somewhat agree	Somewhat agree	Somewhat agree	Neither disagree nor agree	Somewhat agree	Completely agree	Completely agree	Somewhat agree	Completely agree	Somewhat agree	Neither disagree nor agree	Somewhat agree	Completely agree	Somewhat agree	Somewhat agree	Completely agree	Completely agree	Completely agree	Medicine of which the effectiveness was demonstrated scientifically in clinical trials.		Male	26-40	Yemen	Graduate/higher diploma	Engineering/Math related
2017/02/02 10:54:59 AM GMT+1	7-12 hours	More than 10 years	Personal Computer/Laptop;Smart phone	Google	More than 6 times	Look for medication for specific disease;Read more about disease diagnosed by your doctor;Read about medications prescribed by your doctor	At a general search engine such as Google, Bing or Yahoo	Somewhat agree	2-3 links	Somewhat agree	Somewhat agree	Somewhat agree	Somewhat agree	Somewhat agree	Neither disagree nor agree	Neither disagree nor agree	Neither disagree nor agree	Somewhat agree	Somewhat agree	Completely disagree	Somewhat disagree	Completely disagree	Completely disagree	Completely agree	Completely agree	Neither disagree nor agree	Somewhat agree	Completely agree	Neither disagree nor agree	Somewhat agree	Completely disagree	Somewhat agree	Somewhat agree	Completely agree	Completely agree	Completely disagree	Medicine of which the effectiveness was demonstrated scientifically in clinical trials.		Male	26-40	Saudi Arabia	High school	Computer Science
2017/02/02 11:24:05 AM GMT+1	Less than 2 hours	5-10 years	Personal Computer/Laptop;Smart phone	Google	1-2 times	Look for symptoms and the possible diagnosis	At a general search engine such as Google, Bing or Yahoo	Somewhat disagree	2-3 links	Somewhat agree	Neither disagree nor agree	Neither disagree nor agree	Neither disagree nor agree	Neither disagree nor agree	Neither disagree nor agree	Neither disagree nor agree	Neither disagree nor agree	Neither disagree nor agree	Neither disagree nor agree	Neither disagree nor agree	Neither disagree nor agree	Neither disagree nor agree	Neither disagree nor agree	Completely agree	Completely agree	Somewhat agree	Somewhat agree	Neither disagree nor agree	Somewhat agree	Somewhat disagree	Neither disagree nor agree	Completely agree	Completely agree	Somewhat agree	Completely agree	Somewhat agree	I donâ€™t mind if it has both 1 & 2		Male	18-25	Saudi Arabia	High school	Engineering/Math related
2017/02/02 12:09:48 PM GMT+1	2-6 hours	More than 10 years	Personal Computer/Laptop;Smart phone	Google	More than 6 times	Look for symptoms and the possible diagnosis	At a general search engine such as Google, Bing or Yahoo	Neither disagree nor agree	2-3 links	Somewhat agree	Somewhat agree	Somewhat agree	Somewhat agree	Somewhat agree	Neither disagree nor agree	Neither disagree nor agree	Neither disagree nor agree	Neither disagree nor agree	Neither disagree nor agree	Neither disagree nor agree	Neither disagree nor agree	Completely disagree	Somewhat disagree	Completely agree	Completely agree	Somewhat disagree	Neither disagree nor agree	Somewhat agree	Somewhat agree	Neither disagree nor agree	Somewhat disagree	Completely agree	Somewhat agree	Somewhat agree	Somewhat agree	Completely disagree	I donâ€™t know		Male	26-40	Yemen	Postgraduate	Engineering/Math related
2017/02/02 1:36:26 PM GMT+1	More than 12 hours	More than 10 years	Smart phone	Google	3-5 times	Look for symptoms and the possible diagnosis;Read more about disease diagnosed by your doctor	At a general search engine such as Google, Bing or Yahoo	Somewhat agree	More than 5 links	Completely agree	Completely agree	Somewhat agree	Somewhat agree	Completely agree	Neither disagree nor agree	Somewhat agree	Neither disagree nor agree	Somewhat disagree	Somewhat disagree	Somewhat agree	Somewhat agree	Neither disagree nor agree	Somewhat agree	Neither disagree nor agree	Completely agree	Somewhat disagree	Somewhat agree	Somewhat agree	Somewhat agree	Somewhat disagree	Somewhat disagree	Completely agree	Somewhat agree	Somewhat agree	Completely agree	Neither disagree nor agree	I donâ€™t know		Male	26-40	United Kingdom	Postgraduate	Engineering/Math related
2017/02/02 1:39:52 PM GMT+1	2-6 hours	5-10 years	Personal Computer/Laptop;Smart phone	Google	More than 6 times	Look for symptoms and the possible diagnosis;Read more about disease diagnosed by your doctor;Read about medications prescribed by your doctor	At a site that specializes in health information, like NHS choices or WebMD (if you use a search engine to reach a specific site select this option)	Somewhat agree	2-3 links	Neither disagree nor agree	Completely agree	Somewhat agree	Completely agree	Neither disagree nor agree	Neither disagree nor agree	Completely agree	Completely agree	Neither disagree nor agree	Completely agree	Completely agree	Completely agree	Completely agree	Somewhat agree	Completely agree	Somewhat agree	Somewhat disagree	Neither disagree nor agree	Completely agree	Completely disagree	Completely disagree	Completely agree	Completely agree	Somewhat agree	Somewhat agree	Completely agree	Completely agree	I donâ€™t mind if it has both 1 & 2		Female	18-25	United Kingdom	Graduate/higher diploma	science related
2017/02/02 2:01:11 PM GMT+1	More than 12 hours	5-10 years	Personal Computer/Laptop;Smart phone	Google	More than 6 times	Look for medication for specific disease;Look for symptoms and the possible diagnosis	At a general search engine such as Google, Bing or Yahoo	Neither disagree nor agree	2-3 links	Completely agree	Completely agree	Completely agree	Completely agree	Completely agree	Completely agree	Somewhat agree	Somewhat agree	Completely agree	Completely agree	Completely agree	Completely agree	Completely agree	Completely agree	Completely agree	Completely agree	Completely agree	Completely agree	Somewhat agree	Somewhat agree	Somewhat agree	Completely agree	Completely agree	Completely agree	Completely agree	Completely agree	Completely agree	Medicine of which the effectiveness was demonstrated scientifically in clinical trials.		Male	26-40	Saudi Arabia	Postgraduate	Engineering/Math related
2017/02/02 2:25:44 PM GMT+1	More than 12 hours	More than 10 years	Personal Computer/Laptop;Tablet;Smart phone;Smart TV	Google	1-2 times	Read more about disease diagnosed by your doctor	At a more general site like Wikipedia, that contains information on all kinds of topics (if you use a search engine to reach a specific site select this option)	Neither disagree nor agree	2-3 links	Neither disagree nor agree	Somewhat agree	Neither disagree nor agree	Neither disagree nor agree	Somewhat agree	Neither disagree nor agree	Somewhat agree	Neither disagree nor agree	Somewhat disagree	Somewhat disagree	Completely disagree	Completely disagree	Somewhat disagree	Completely agree	Somewhat agree	Somewhat agree	Somewhat agree	Somewhat agree	Somewhat agree	Neither disagree nor agree	Neither disagree nor agree	Completely agree	Somewhat agree	Somewhat agree	Somewhat agree	Somewhat agree	Somewhat agree	I donâ€™t mind if it has both 1 & 2		Male	26-40	United Kingdom	Postgraduate	Business related
2017/02/02 2:47:11 PM GMT+1	2-6 hours	5-10 years	Personal Computer/Laptop;Smart phone	Google	More than 6 times	Look for medication for specific disease;Look for symptoms and the possible diagnosis;Read more about disease diagnosed by your doctor	At a general search engine such as Google, Bing or Yahoo	Neither disagree nor agree	More than 5 links	Neither disagree nor agree	Completely agree	Completely agree	Somewhat agree	Neither disagree nor agree	Somewhat agree	Neither disagree nor agree	Completely disagree	Neither disagree nor agree	Somewhat disagree	Somewhat agree	Somewhat agree	Neither disagree nor agree	Neither disagree nor agree	Completely agree	Somewhat agree	Neither disagree nor agree	Completely agree	Neither disagree nor agree	Somewhat agree	Neither disagree nor agree	Neither disagree nor agree	Completely agree	Completely agree	Somewhat agree	Completely agree	Somewhat agree	Medicine of which the effectiveness was demonstrated scientifically in clinical trials.		Female	26-40	Yemen	Postgraduate	Medical related
2017/02/02 5:32:12 PM GMT+1	More than 12 hours	5-10 years	Personal Computer/Laptop;Smart phone	Google	I have never sought health information online	I never seek health information online	I never sought health information online	Somewhat agree	Just one link	Completely disagree	Completely disagree	Somewhat disagree	Completely disagree	Neither disagree nor agree	Somewhat disagree	Completely disagree	Completely disagree	Completely disagree	Completely disagree	Completely disagree	Completely disagree	Completely disagree	Completely disagree	Completely disagree	Completely disagree	Completely disagree	Completely disagree	Completely disagree	Completely disagree	Completely disagree	Completely disagree	Completely disagree	Completely disagree	Completely disagree	Completely disagree	Completely disagree	I donâ€™t know		Male	26-40	Yemen	Graduate/higher diploma	Engineering/Math related
2017/02/02 5:42:16 PM GMT+1	7-12 hours	5-10 years	Personal Computer/Laptop;Smart phone	Google	More than 6 times	Look for medication for specific disease;Look for symptoms and the possible diagnosis;Read more about disease diagnosed by your doctor;Read about medications prescribed by your doctor	At a general search engine such as Google, Bing or Yahoo	Neither disagree nor agree	More than 5 links	Somewhat agree	Neither disagree nor agree	Neither disagree nor agree	Neither disagree nor agree	Neither disagree nor agree	Somewhat agree	Completely agree	Somewhat agree	Neither disagree nor agree	Neither disagree nor agree	Somewhat agree	Completely agree	Somewhat agree	Somewhat agree	Completely agree	Somewhat agree	Somewhat disagree	Somewhat agree	Somewhat disagree	Neither disagree nor agree	Somewhat agree	Somewhat agree	Completely agree	Completely agree	Completely agree	Completely agree	Somewhat agree	I donâ€™t know		Female	18-25	Yemen	Postgraduate	English language
2017/02/02 7:29:38 PM GMT+1	7-12 hours	3-5 years	Personal Computer/Laptop;Smart phone	Google	More than 6 times	Look for medication for specific disease;Look for symptoms and the possible diagnosis;Read more about disease diagnosed by your doctor;Read about medications prescribed by your doctor	At a more general site like Wikipedia, that contains information on all kinds of topics (if you use a search engine to reach a specific site select this option)	Somewhat agree	2-3 links	Neither disagree nor agree	Neither disagree nor agree	Neither disagree nor agree	Neither disagree nor agree	Neither disagree nor agree	Neither disagree nor agree	Neither disagree nor agree	Somewhat agree	Somewhat agree	Completely agree	Completely agree	Completely agree	Completely agree	Somewhat agree	Somewhat agree	Completely agree	Somewhat agree	Completely agree	Somewhat disagree	Somewhat agree	Neither disagree nor agree	Completely agree	Somewhat agree	Neither disagree nor agree	Completely agree	Completely agree	Completely agree	I donâ€™t know	i prefer a health webpage with experiences of people and interaction.	Female	18-25	Yemen	Graduate/higher diploma	Engineering/Math related
2017/02/02 7:36:48 PM GMT+1	7-12 hours	5-10 years	Personal Computer/Laptop;Smart phone	Google	I have never sought health information online	Look for medication for specific disease	At a more general site like Wikipedia, that contains information on all kinds of topics (if you use a search engine to reach a specific site select this option)	Completely agree	Just one link	Completely disagree	Completely disagree	Somewhat agree	Somewhat agree	Completely agree	Completely disagree	Somewhat agree	Somewhat agree	Neither disagree nor agree	Somewhat agree	Completely agree	Completely agree	Neither disagree nor agree	Somewhat disagree	Completely agree	Completely disagree	Neither disagree nor agree	Neither disagree nor agree	Completely disagree	Completely disagree	Somewhat agree	Neither disagree nor agree	Somewhat disagree	Somewhat disagree	Somewhat disagree	Completely disagree	Somewhat agree	I donâ€™t mind if it has both 1 & 2		Male	18-25	Germany	High school	Medical related
2017/02/02 7:48:38 PM GMT+1	More than 12 hours	More than 10 years	Personal Computer/Laptop;Smart phone	Google;Bing	More than 6 times	Look for medication for specific disease;Look for symptoms and the possible diagnosis;Read about medications prescribed by your doctor	http://consult.islamweb.net/consult/index.php?page=listing&pid=4	Neither disagree nor agree	4-5 links	Somewhat agree	Somewhat agree	Somewhat agree	Somewhat agree	Somewhat agree	Neither disagree nor agree	Neither disagree nor agree	Neither disagree nor agree	Neither disagree nor agree	Neither disagree nor agree	Somewhat agree	Somewhat agree	Somewhat agree	Somewhat agree	Neither disagree nor agree	Somewhat agree	Neither disagree nor agree	Somewhat agree	Completely agree	Somewhat agree	Somewhat disagree	Completely disagree	Somewhat agree	Somewhat agree	Neither disagree nor agree	Neither disagree nor agree	Somewhat agree	Only alternative medicine (any of a range of medical therapies that are not regarded by medical professionals)		Male	26-40	Saudi Arabia	Postgraduate	Computer Science
2017/02/02 7:50:26 PM GMT+1	7-12 hours	More than 10 years	Personal Computer/Laptop;Smart phone	Google	More than 6 times	Read more about disease diagnosed by your doctor	At a general search engine such as Google, Bing or Yahoo	Completely agree	4-5 links	Somewhat agree	Completely agree	Completely agree	Completely agree	Completely agree	Completely agree	Completely agree	Somewhat agree	Completely agree	Somewhat agree	Somewhat agree	Somewhat agree	Somewhat agree	Completely agree	Completely agree	Completely agree	Completely agree	Somewhat agree	Completely agree	Somewhat agree	Somewhat agree	Somewhat agree	Completely agree	Somewhat agree	Completely agree	Completely agree	Somewhat agree	I donâ€™t mind if it has both 1 & 2		Male	26-40	Yemen	Postgraduate	Computer Scince
2017/02/02 9:09:49 PM GMT+1	Less than 2 hours	3-5 years	Personal Computer/Laptop;Smart phone	Google	I have never sought health information online	I never seek health information online	I never sought health information online	Somewhat agree	Just one link	Somewhat agree	Completely agree	Somewhat agree	Somewhat agree	Somewhat agree	Somewhat agree	Somewhat agree	Somewhat agree	Completely agree	Somewhat disagree	Completely agree	Completely agree	Somewhat agree	Somewhat agree	Completely disagree	Somewhat agree	Somewhat agree	Completely agree	Neither disagree nor agree	Somewhat agree	Somewhat agree	Completely disagree	Somewhat agree	Somewhat agree	Somewhat agree	Completely agree	Somewhat agree	I donâ€™t know		Male	26-40		Postgraduate
2017/02/02 9:45:13 PM GMT+1	2-6 hours	More than 10 years	Personal Computer/Laptop;Smart phone	Google	More than 6 times	Look for medication for specific disease;Read more about disease diagnosed by your doctor	At a general search engine such as Google, Bing or Yahoo	Somewhat agree	More than 5 links	Somewhat agree	Completely agree	Neither disagree nor agree	Neither disagree nor agree	Neither disagree nor agree	Somewhat agree	Somewhat agree	Somewhat agree	Neither disagree nor agree	Somewhat agree	Neither disagree nor agree	Neither disagree nor agree	Neither disagree nor agree	Somewhat agree	Somewhat agree	Completely agree	Somewhat disagree	Somewhat agree	Somewhat disagree	Completely disagree	Somewhat disagree	Completely agree	Completely agree	Somewhat agree	Somewhat agree	Completely agree	Completely agree	I donâ€™t know		Male	41-60	Saudi Arabia	Postgraduate	Engineering/Math related
2017/02/02 9:49:41 PM GMT+1	2-6 hours	More than 10 years	Personal Computer/Laptop	Google	More than 6 times	Look for symptoms and the possible diagnosis;Read more about disease diagnosed by your doctor;Read about medications prescribed by your doctor	At a general search engine such as Google, Bing or Yahoo	Somewhat agree	4-5 links	Somewhat disagree	Somewhat agree	Somewhat disagree	Somewhat agree	Neither disagree nor agree	Somewhat agree	Neither disagree nor agree	Somewhat agree	Neither disagree nor agree	Neither disagree nor agree	Neither disagree nor agree	Somewhat agree	Neither disagree nor agree	Somewhat agree	Completely agree	Completely agree	Somewhat agree	Completely agree	Somewhat disagree	Somewhat agree	Somewhat disagree	Somewhat agree	Somewhat agree	Somewhat agree	Somewhat agree	Somewhat agree	Somewhat agree	Medicine of which the effectiveness was demonstrated scientifically in clinical trials.		Female	18-25	Saudi Arabia	Postgraduate	Science ( biology )
2017/02/02 10:42:08 PM GMT+1	7-12 hours	More than 10 years	Personal Computer/Laptop;Tablet;Smart phone	Google;onepetro	3-5 times	Look for medication for specific disease;Read about medications prescribed by your doctor	At a social network site like Facebook	Somewhat disagree	2-3 links	Somewhat disagree	Somewhat disagree	Completely agree	Completely agree	Completely agree	Neither disagree nor agree	Completely agree	Completely agree	Completely agree	Somewhat disagree	Completely agree	Completely agree	Somewhat agree	Somewhat agree	Completely agree	Somewhat agree	Neither disagree nor agree	Completely agree	Somewhat agree	Neither disagree nor agree	Neither disagree nor agree	Neither disagree nor agree	Neither disagree nor agree	Neither disagree nor agree	Somewhat agree	Completely agree	Neither disagree nor agree	I donâ€™t know		Male	26-40		Postgraduate	Engineering/Math related
2017/02/03 12:09:27 AM GMT+1	More than 12 hours	Less than 3 years	Personal Computer/Laptop;Tablet;Smart phone	Google	3-5 times	Look for symptoms and the possible diagnosis;Read about medications prescribed by your doctor	At a general search engine such as Google, Bing or Yahoo	Completely agree	More than 5 links	Completely agree	Completely agree	Completely agree	Somewhat agree	Somewhat agree	Completely agree	Somewhat agree	Somewhat agree	Somewhat agree	Somewhat agree	Neither disagree nor agree	Neither disagree nor agree	Somewhat agree	Somewhat agree	Completely agree	Completely agree	Neither disagree nor agree	Neither disagree nor agree	Somewhat agree	Somewhat agree	Neither disagree nor agree	Completely agree	Completely agree	Completely agree	Completely agree	Completely agree	Neither disagree nor agree	I donâ€™t mind if it has both 1 & 2		Male	26-40		Postgraduate	Computer Science
2017/02/03 12:17:03 AM GMT+1	More than 12 hours	5-10 years	Personal Computer/Laptop;Smart phone	Google	3-5 times	Look for medication for specific disease;Look for symptoms and the possible diagnosis;Read about medications prescribed by your doctor	At a general search engine such as Google, Bing or Yahoo	Somewhat agree	More than 5 links	Somewhat agree	Somewhat agree	Somewhat agree	Somewhat agree	Somewhat agree	Somewhat agree	Somewhat agree	Somewhat agree	Somewhat agree	Somewhat agree	Completely agree	Completely agree	Somewhat agree	Completely agree	Completely agree	Completely agree	Completely agree	Completely agree	Somewhat agree	Somewhat agree	Somewhat agree	Completely agree	Somewhat agree	Somewhat agree	Somewhat agree	Somewhat agree	Somewhat agree	I donâ€™t know		Male	26-40		Graduate/higher diploma	science
2017/02/03 12:30:12 AM GMT+1	2-6 hours	Less than 3 years	Personal Computer/Laptop;Smart phone	Google	More than 6 times	Look for medication for specific disease;Look for symptoms and the possible diagnosis	At a general search engine such as Google, Bing or Yahoo	Somewhat disagree	More than 5 links	Somewhat agree	Somewhat agree	Somewhat agree	Somewhat agree	Neither disagree nor agree	Neither disagree nor agree	Neither disagree nor agree	Neither disagree nor agree	Neither disagree nor agree	Somewhat disagree	Somewhat disagree	Somewhat agree	Somewhat disagree	Neither disagree nor agree	Completely agree	Completely agree	Completely agree	Completely agree	Neither disagree nor agree	Somewhat agree	Somewhat agree	Neither disagree nor agree	Completely agree	Completely agree	Completely agree	Completely agree	Completely agree	I donâ€™t know		Male	26-40	Yemen	Graduate/higher diploma	Medical related
2017/02/03 1:18:18 AM GMT+1	2-6 hours	5-10 years	Personal Computer/Laptop;Smart phone	Google	I have never sought health information online	Look for medication for specific disease;Look for symptoms and the possible diagnosis	At a general search engine such as Google, Bing or Yahoo	Somewhat disagree	2-3 links	Completely disagree	Somewhat disagree	Somewhat disagree	Somewhat agree	Completely disagree	Completely disagree	Completely disagree	Completely disagree	Somewhat disagree	Somewhat agree	Neither disagree nor agree	Neither disagree nor agree	Somewhat disagree	Completely disagree	Completely disagree	Completely disagree	Somewhat disagree	Somewhat disagree	Somewhat disagree	Somewhat disagree	Somewhat disagree	Completely disagree	Completely disagree	Somewhat disagree	Somewhat disagree	Completely disagree	Somewhat disagree	Medicine of which the effectiveness was demonstrated scientifically in clinical trials.		Male	18-25	Germany	Graduate/higher diploma	Engineering/Math related
2017/02/03 1:57:54 AM GMT+1	2-6 hours	More than 10 years	Personal Computer/Laptop;Tablet;Smart phone	Google	More than 6 times	Look for symptoms and the possible diagnosis	At a site that specializes in health information, like NHS choices or WebMD (if you use a search engine to reach a specific site select this option)	Somewhat disagree	4-5 links	Somewhat disagree	Somewhat agree	Somewhat agree	Somewhat agree	Neither disagree nor agree	Somewhat agree	Somewhat agree	Somewhat agree	Somewhat agree	Somewhat agree	Somewhat agree	Somewhat agree	Neither disagree nor agree	Somewhat agree	Somewhat agree	Somewhat agree	Somewhat agree	Neither disagree nor agree	Somewhat agree	Somewhat agree	Somewhat agree	Somewhat agree	Somewhat agree	Somewhat agree	Somewhat agree	Somewhat agree	Somewhat agree	I donâ€™t mind if it has both 1 & 2		Male	18-25	Italy	Graduate/higher diploma	Medical related
2017/02/03 8:55:00 AM GMT+1	More than 12 hours	5-10 years	Personal Computer/Laptop;Tablet;Smart phone	Google	More than 6 times	Look for medication for specific disease;Look for symptoms and the possible diagnosis;Read more about disease diagnosed by your doctor;Read about medications prescribed by your doctor	At a general search engine such as Google, Bing or Yahoo	Completely agree	2-3 links	Completely agree	Completely agree	Completely agree	Completely agree	Completely agree	Completely agree	Completely agree	Completely agree	Completely agree	Completely agree	Completely agree	Completely agree	Completely agree	Completely agree	Completely agree	Completely agree	Completely agree	Completely agree	Completely agree	Completely agree	Completely agree	Neither disagree nor agree	Completely agree	Completely agree	Completely agree	Completely agree	Neither disagree nor agree	I donâ€™t mind if it has both 1 & 2	don't also forget about the reliability of smart health wearable devices and diagnosis and prescriptions they give.	Male	26-40	Yemen	Graduate/higher diploma	Engineering/Math related
2017/02/03 8:56:28 AM GMT+1	7-12 hours	More than 10 years	Personal Computer/Laptop;Smart phone	Google	More than 6 times	Look for symptoms and the possible diagnosis;Read more about disease diagnosed by your doctor;Read about medications prescribed by your doctor	At a general search engine such as Google, Bing or Yahoo	Somewhat agree	More than 5 links	Somewhat agree	Completely agree	Somewhat agree	Somewhat agree	Somewhat agree	Somewhat agree	Completely agree	Somewhat agree	Somewhat agree	Neither disagree nor agree	Completely agree	Completely agree	Somewhat agree	Completely agree	Completely agree	Completely agree	Somewhat agree	Completely agree	Completely agree	Somewhat disagree	Somewhat disagree	Somewhat disagree	Somewhat agree	Completely agree	Somewhat agree	Completely agree	Completely agree	Medicine of which the effectiveness was demonstrated scientifically in clinical trials.		Male	26-40	Saudi Arabia	Postgraduate	Engineering/Math related
2017/02/03 10:51:20 AM GMT+1	2-6 hours	5-10 years	Personal Computer/Laptop;Smart phone	Google	I have never sought health information online	Look for medication for specific disease;Look for symptoms and the possible diagnosis	At a general search engine such as Google, Bing or Yahoo	Somewhat disagree	2-3 links	Completely disagree	Somewhat disagree	Somewhat disagree	Somewhat agree	Completely disagree	Completely disagree	Completely disagree	Completely disagree	Somewhat disagree	Somewhat agree	Neither disagree nor agree	Neither disagree nor agree	Somewhat disagree	Completely disagree	Completely disagree	Completely disagree	Somewhat disagree	Somewhat disagree	Somewhat disagree	Somewhat disagree	Somewhat disagree	Completely disagree	Completely disagree	Somewhat disagree	Somewhat disagree	Completely disagree	Somewhat disagree	Medicine of which the effectiveness was demonstrated scientifically in clinical trials.		Male	18-25	Germany	Graduate/higher diploma	Engineering/Math related
2017/02/03 10:51:35 AM GMT+1	More than 12 hours	More than 10 years	Personal Computer/Laptop;Tablet;Smart phone	Google	More than 6 times	Look for medication for specific disease;Look for symptoms and the possible diagnosis	At a general search engine such as Google, Bing or Yahoo	Somewhat agree	4-5 links	Completely agree	Somewhat agree	Somewhat agree	Somewhat agree	Somewhat disagree	Completely agree	Completely disagree	Neither disagree nor agree	Somewhat agree	Completely agree	Completely agree	Completely agree	Completely agree	Completely agree	Completely agree	Completely agree	Somewhat agree	Completely agree	Completely disagree	Somewhat agree	Somewhat agree	Completely agree	Completely agree	Completely agree	Completely agree	Completely agree	Somewhat disagree	I donâ€™t mind if it has both 1 & 2		Male	26-40	Saudi Arabia	Graduate/higher diploma	Engineering/Math related
2017/02/03 10:54:49 AM GMT+1	More than 12 hours	5-10 years	Personal Computer/Laptop;Tablet;Smart phone	Google	More than 6 times	Look for symptoms and the possible diagnosis;Read more about disease diagnosed by your doctor;Read about medications prescribed by your doctor;side effects of some suggested medicines, natural ways of treating a problem (without relying on doctor-suggested medicines), information on surgeries etc.	At a more general site like Wikipedia, that contains information on all kinds of topics (if you use a search engine to reach a specific site select this option)	Somewhat agree	4-5 links	Somewhat agree	Somewhat disagree	Completely disagree	Completely agree	Neither disagree nor agree	Completely agree	Neither disagree nor agree	Neither disagree nor agree	Somewhat agree	Neither disagree nor agree	Completely agree	Completely agree	Completely agree	Somewhat agree	Completely agree	Completely agree	Somewhat agree	Completely agree	Somewhat agree	Somewhat agree	Somewhat agree	Somewhat agree	Completely agree	Completely agree	Somewhat agree	Completely agree	Completely agree	I donâ€™t mind if it has both 1 & 2		Male	26-40	Japan	Postgraduate	Engineering/Math related
2017/02/03 12:27:02 PM GMT+1	2-6 hours	More than 10 years	Personal Computer/Laptop;Smart phone	Google	More than 6 times	Look for medication for specific disease;Look for symptoms and the possible diagnosis	At a site that specializes in health information, like NHS choices or WebMD (if you use a search engine to reach a specific site select this option)	Somewhat disagree	2-3 links	Completely agree	Completely agree	Completely agree	Completely agree	Completely agree	Completely agree	Completely agree	Completely agree	Completely agree	Somewhat disagree	Completely disagree	Somewhat disagree	Somewhat agree	Completely agree	Completely agree	Completely agree	Completely agree	Completely disagree	Completely agree	Completely agree	Completely agree	Completely agree	Completely agree	Completely agree	Completely agree	Completely agree	Completely agree	Medicine of which the effectiveness was demonstrated scientifically in clinical trials.		Male	26-40	Saudi Arabia	Postgraduate	Engineering/Math related
2017/02/03 1:52:36 PM GMT+1	2-6 hours	More than 10 years	Personal Computer/Laptop;Smart phone;Smart TV	Google	3-5 times	Look for medication for specific disease	At a site that specializes in health information, like NHS choices or WebMD (if you use a search engine to reach a specific site select this option)	Neither disagree nor agree	4-5 links	Completely disagree	Completely agree	Somewhat agree	Somewhat agree	Somewhat agree	Somewhat agree	Somewhat agree	Somewhat disagree	Somewhat agree	Somewhat agree	Somewhat agree	Somewhat disagree	Neither disagree nor agree	Neither disagree nor agree	Somewhat agree	Completely agree	Completely agree	Somewhat agree	Somewhat agree	Somewhat agree	Somewhat agree	Somewhat agree	Completely disagree	Somewhat disagree	Somewhat agree	Neither disagree nor agree	Completely agree	Medicine of which the effectiveness was demonstrated scientifically in clinical trials.		Male	26-40	Saudi Arabia	Graduate/higher diploma	Computer science
2017/02/03 1:55:13 PM GMT+1	More than 12 hours	5-10 years	Personal Computer/Laptop;Smart phone	Google	1-2 times	Look for medication for specific disease	At a general search engine such as Google, Bing or Yahoo	Somewhat agree	More than 5 links	Neither disagree nor agree	Somewhat agree	Somewhat agree	Somewhat agree	Neither disagree nor agree	Somewhat agree	Somewhat agree	Neither disagree nor agree	Neither disagree nor agree	Neither disagree nor agree	Neither disagree nor agree	Neither disagree nor agree	Neither disagree nor agree	Neither disagree nor agree	Somewhat agree	Somewhat agree	Somewhat disagree	Somewhat agree	Neither disagree nor agree	Neither disagree nor agree	Neither disagree nor agree	Somewhat agree	Somewhat agree	Somewhat agree	Somewhat agree	Somewhat agree	Neither disagree nor agree	I donâ€™t know		Male	26-40	Korea South	Graduate/higher diploma	Engineering/Math related
2017/02/03 5:14:37 PM GMT+1	7-12 hours	5-10 years	Personal Computer/Laptop;Smart phone	Google	1-2 times	Look for symptoms and the possible diagnosis;Read more about disease diagnosed by your doctor;Read about medications prescribed by your doctor	At a general search engine such as Google, Bing or Yahoo	Completely disagree	2-3 links	Completely disagree	Somewhat disagree	Somewhat agree	Neither disagree nor agree	Completely agree	Somewhat agree	Somewhat agree	Somewhat disagree	Completely disagree	Somewhat agree	Somewhat disagree	Neither disagree nor agree	Completely agree	Somewhat agree	Completely agree	Somewhat agree	Somewhat agree	Completely agree	Neither disagree nor agree	Neither disagree nor agree	Somewhat agree	Neither disagree nor agree	Completely agree	Completely agree	Completely agree	Completely agree	Completely agree	Medicine of which the effectiveness was demonstrated scientifically in clinical trials.		Male	26-40	Yemen	Graduate/higher diploma	Engineering/Math related
2017/02/03 8:23:59 PM GMT+1	Less than 2 hours	Less than 3 years	Personal Computer/Laptop;Smart phone	Google	3-5 times	Look for medication for specific disease;Look for symptoms and the possible diagnosis	At a more general site like Wikipedia, that contains information on all kinds of topics (if you use a search engine to reach a specific site select this option)	Completely agree	4-5 links	Somewhat disagree	Somewhat disagree	Somewhat agree	Somewhat disagree	Neither disagree nor agree	Somewhat agree	Completely disagree	Neither disagree nor agree	Somewhat agree	Somewhat agree	Completely disagree	Somewhat disagree	Neither disagree nor agree	Somewhat disagree	Completely agree	Somewhat disagree	Neither disagree nor agree	Neither disagree nor agree	Somewhat disagree	Somewhat disagree	Somewhat disagree	Somewhat agree	Somewhat agree	Somewhat disagree	Somewhat agree	Somewhat disagree	Somewhat disagree	I donâ€™t mind if it has both 1 & 2		Male	26-40	Yemen	High school	Business related
2017/02/03 8:47:07 PM GMT+1	Less than 2 hours	5-10 years	Personal Computer/Laptop;Tablet;Smart phone	Google	More than 6 times	Look for symptoms and the possible diagnosis	At a general search engine such as Google, Bing or Yahoo	Completely disagree	2-3 links	Somewhat disagree	Neither disagree nor agree	Neither disagree nor agree	Somewhat disagree	Somewhat disagree	Somewhat disagree	Somewhat disagree	Completely disagree	Completely disagree	Completely disagree	Completely disagree	Completely disagree	Completely disagree	Completely disagree	Somewhat disagree	Somewhat disagree	Neither disagree nor agree	Neither disagree nor agree	Neither disagree nor agree	Somewhat disagree	Somewhat disagree	Somewhat disagree	Somewhat disagree	Somewhat disagree	Neither disagree nor agree	Neither disagree nor agree	Neither disagree nor agree	Medicine of which the effectiveness was demonstrated scientifically in clinical trials.		Male	26-40	Yemen	Graduate/higher diploma	Engineering/Math related
2017/02/03 11:23:39 PM GMT+1	2-6 hours	More than 10 years	Personal Computer/Laptop;Smart phone	Google	I have never sought health information online	I never seek health information online	I never sought health information online	Completely disagree	2-3 links	Somewhat agree	Completely agree	Completely disagree	Somewhat agree	Somewhat agree	Somewhat agree	Somewhat agree	Somewhat agree	Somewhat agree	Somewhat agree	Completely disagree	Completely disagree	Completely disagree	Somewhat agree	Completely agree	Completely agree	Completely agree	Completely agree	Completely agree	Completely agree	Somewhat agree	Completely agree	Somewhat agree	Somewhat agree	Completely agree	Completely agree	Completely agree	I donâ€™t know		Male	26-40	Yemen	Graduate/higher diploma	Engineering/Math related
2017/02/04 4:28:56 AM GMT+1	7-12 hours	More than 10 years	Personal Computer/Laptop;Tablet;Smart phone;Smart TV	Google	More than 6 times	Look for medication for specific disease;Look for symptoms and the possible diagnosis;Read more about disease diagnosed by your doctor;Read about medications prescribed by your doctor	At a general search engine such as Google, Bing or Yahoo	Somewhat agree	4-5 links	Neither disagree nor agree	Somewhat agree	Neither disagree nor agree	Neither disagree nor agree	Neither disagree nor agree	Neither disagree nor agree	Neither disagree nor agree	Neither disagree nor agree	Neither disagree nor agree	Neither disagree nor agree	Somewhat agree	Somewhat agree	Somewhat agree	Neither disagree nor agree	Somewhat disagree	Neither disagree nor agree	Somewhat disagree	Somewhat disagree	Somewhat agree	Neither disagree nor agree	Neither disagree nor agree	Neither disagree nor agree	Somewhat agree	Somewhat agree	Somewhat agree	Somewhat agree	Somewhat agree	I donâ€™t know		Male	26-40	Egypt	Postgraduate	Medical related
2017/02/04 7:01:51 AM GMT+1	2-6 hours	More than 10 years	Personal Computer/Laptop	Google	More than 6 times	Look for medication for specific disease;Read more about disease diagnosed by your doctor	At a general search engine such as Google, Bing or Yahoo	Neither disagree nor agree	2-3 links	Somewhat agree	Somewhat agree	Somewhat agree	Somewhat agree	Somewhat agree	Neither disagree nor agree	Somewhat agree	Somewhat agree	Neither disagree nor agree	Somewhat agree	Completely disagree	Completely disagree	Completely disagree	Completely disagree	Completely disagree	Somewhat agree	Completely disagree	Somewhat agree	Somewhat agree	Somewhat agree	Somewhat agree	Neither disagree nor agree	Completely disagree	Completely disagree	Completely disagree	Completely disagree	Somewhat agree	Medicine of which the effectiveness was demonstrated scientifically in clinical trials.	I think health webpages are supplementary you have to visit doctor	Male	26-40	Yemen	Graduate/higher diploma	Business related
2017/02/04 10:45:50 AM GMT+1	7-12 hours	More than 10 years	Tablet;Smart phone	Google	3-5 times	Look for symptoms and the possible diagnosis;Read about medications prescribed by your doctor	At a general search engine such as Google, Bing or Yahoo	Somewhat agree	4-5 links	Completely agree	Completely agree	Completely agree	Completely agree	Completely agree	Completely agree	Completely agree	Completely agree	Somewhat agree	Somewhat agree	Somewhat agree	Completely agree	Completely agree	Completely agree	Completely agree	Somewhat agree	Neither disagree nor agree	Completely agree	Neither disagree nor agree	Somewhat agree	Neither disagree nor agree	Completely agree	Completely agree	Completely agree	Completely agree	Completely agree	Completely agree	Medicine of which the effectiveness was demonstrated scientifically in clinical trials.		Male	26-40	United Kingdom	High school	Business related
2017/02/04 1:52:57 PM GMT+1	2-6 hours	5-10 years	Personal Computer/Laptop;Smart phone	Google;youtube	More than 6 times	Look for symptoms and the possible diagnosis;the new things of dentist	At a site that specializes in health information, like NHS choices or WebMD (if you use a search engine to reach a specific site select this option)	Somewhat disagree	2-3 links	Somewhat agree	Completely agree	Neither disagree nor agree	Completely agree	Somewhat agree	Neither disagree nor agree	Neither disagree nor agree	Somewhat agree	Somewhat agree	Somewhat disagree	Completely agree	Somewhat agree	Somewhat agree	Completely agree	Completely agree	Completely agree	Somewhat agree	Completely agree	Neither disagree nor agree	Somewhat agree	Somewhat agree	Somewhat agree	Completely agree	Completely agree	Completely agree	Completely agree	Somewhat agree	I donâ€™t mind if it has both 1 & 2		Female	26-40	Yemen	Postgraduate	Medical related
2017/02/04 8:29:02 PM GMT+1	7-12 hours	More than 10 years	Tablet;Smart phone	Google	3-5 times	Look for symptoms and the possible diagnosis;Read about medications prescribed by your doctor	At a general search engine such as Google, Bing or Yahoo	Neither disagree nor agree	2-3 links	Somewhat agree	Completely agree	Completely agree	Completely agree	Neither disagree nor agree	Neither disagree nor agree	Somewhat disagree	Neither disagree nor agree	Somewhat agree	Somewhat agree	Completely agree	Completely agree	Completely agree	Neither disagree nor agree	Completely agree	Somewhat agree	Completely agree	Completely agree	Completely disagree	Completely agree	Neither disagree nor agree	Somewhat agree	Completely agree	Completely agree	Completely agree	Completely agree	Completely agree	I donâ€™t mind if it has both 1 & 2		Male	18-25	United Kingdom	Graduate/higher diploma	Medical related
2017/02/04 9:03:40 PM GMT+1	2-6 hours	More than 10 years	Personal Computer/Laptop;Tablet;Smart phone	Google	More than 6 times	Look for medication for specific disease;Look for symptoms and the possible diagnosis;Read more about disease diagnosed by your doctor	At a general search engine such as Google, Bing or Yahoo	Somewhat disagree	More than 5 links	Somewhat disagree	Somewhat disagree	Somewhat agree	Completely agree	Somewhat disagree	Somewhat disagree	Completely disagree	Completely disagree	Somewhat disagree	Completely disagree	Somewhat disagree	Somewhat disagree	Somewhat agree	Somewhat disagree	Completely agree	Somewhat agree	Neither disagree nor agree	Neither disagree nor agree	Somewhat disagree	Somewhat agree	Completely disagree	Somewhat agree	Somewhat agree	Somewhat agree	Completely agree	Completely agree	Somewhat disagree	I donâ€™t mind if it has both 1 & 2		Male	26-40	Saudi Arabia	Graduate/higher diploma	Engineering/Math related
2017/02/04 9:04:32 PM GMT+1	7-12 hours	More than 10 years	Personal Computer/Laptop;Smart phone	Google	1-2 times	Look for symptoms and the possible diagnosis	At a general search engine such as Google, Bing or Yahoo	Somewhat agree	2-3 links	Somewhat agree	Somewhat agree	Neither disagree nor agree	Somewhat agree	Somewhat agree	Somewhat agree	Somewhat agree	Neither disagree nor agree	Somewhat agree	Somewhat agree	Completely agree	Completely agree	Neither disagree nor agree	Neither disagree nor agree	Completely agree	Completely agree	Somewhat agree	Completely agree	Completely agree	Somewhat agree	Somewhat agree	Completely agree	Completely agree	Completely agree	Completely agree	Somewhat agree	Somewhat agree	I donâ€™t mind if it has both 1 & 2		Male	18-25	United Kingdom	Graduate/higher diploma	Business related
2017/02/04 9:07:08 PM GMT+1	2-6 hours	More than 10 years	Personal Computer/Laptop;Smart phone	Google	More than 6 times	Look for symptoms and the possible diagnosis;Read more about disease diagnosed by your doctor;Read about medications prescribed by your doctor	At a site that specializes in health information, like NHS choices or WebMD (if you use a search engine to reach a specific site select this option)	Neither disagree nor agree	4-5 links	Somewhat agree	Somewhat agree	Somewhat agree	Somewhat agree	Neither disagree nor agree	Neither disagree nor agree	Neither disagree nor agree	Completely agree	Neither disagree nor agree	Somewhat agree	Completely agree	Completely agree	Completely agree	Somewhat agree	Completely agree	Completely agree	Somewhat agree	Completely agree	Completely agree	Completely agree	Neither disagree nor agree	Completely agree	Completely agree	Completely agree	Neither disagree nor agree	Somewhat agree	Completely agree	Medicine of which the effectiveness was demonstrated scientifically in clinical trials.		Male	18-25	United Kingdom	High school	Business related
2017/02/04 9:17:26 PM GMT+1	7-12 hours	5-10 years	Personal Computer/Laptop;Smart phone	Google	More than 6 times	Look for medication for specific disease;Look for symptoms and the possible diagnosis;Read more about disease diagnosed by your doctor	At a site that specializes in health information, like NHS choices or WebMD (if you use a search engine to reach a specific site select this option)	Somewhat agree	2-3 links	Somewhat agree	Completely agree	Completely agree	Completely agree	Somewhat agree	Completely agree	Completely agree	Completely agree	Somewhat agree	Completely agree	Completely agree	Completely agree	Completely agree	Somewhat agree	Completely agree	Somewhat agree	Neither disagree nor agree	Somewhat agree	Completely agree	Somewhat agree	Somewhat agree	Completely agree	Somewhat agree	Somewhat agree	Somewhat agree	Somewhat agree	Completely agree	Medicine of which the effectiveness was demonstrated scientifically in clinical trials.		Male	18-25	United Kingdom	Graduate/higher diploma	Engineering/Math related
2017/02/04 9:19:18 PM GMT+1	Less than 2 hours	Less than 3 years	Smart phone	Google	3-5 times	Look for medication for specific disease	At a general search engine such as Google, Bing or Yahoo	Somewhat disagree	Just one link	Completely agree	Completely agree	Somewhat agree	Neither disagree nor agree	Somewhat agree	Completely agree	Somewhat disagree	Neither disagree nor agree	Completely agree	Completely agree	Completely agree	Completely agree	Somewhat agree	Completely agree	Completely agree	Completely agree	Somewhat disagree	Completely agree	Neither disagree nor agree	Somewhat agree	Somewhat disagree	Completely agree	Completely agree	Completely agree	Completely agree	Completely agree	Neither disagree nor agree	Only alternative medicine (any of a range of medical therapies that are not regarded by medical professionals)		Male	26-40	Yemen	Graduate/higher diploma	Arts related
2017/02/04 9:29:05 PM GMT+1	2-6 hours	5-10 years	Personal Computer/Laptop;Smart phone	Google	1-2 times	Read more about disease diagnosed by your doctor	At a site that specializes in health information, like NHS choices or WebMD (if you use a search engine to reach a specific site select this option)	Neither disagree nor agree	2-3 links	Somewhat disagree	Somewhat disagree	Neither disagree nor agree	Somewhat agree	Neither disagree nor agree	Somewhat agree	Somewhat agree	Neither disagree nor agree	Somewhat disagree	Somewhat disagree	Neither disagree nor agree	Neither disagree nor agree	Neither disagree nor agree	Somewhat agree	Somewhat agree	Completely agree	Somewhat agree	Somewhat agree	Neither disagree nor agree	Neither disagree nor agree	Somewhat agree	Somewhat agree	Completely agree	Somewhat agree	Neither disagree nor agree	Somewhat agree	Somewhat agree	I donâ€™t mind if it has both 1 & 2		Male	18-25	Yemen	Graduate/higher diploma	Engineering/Math related
2017/02/04 9:44:19 PM GMT+1	7-12 hours	More than 10 years	Personal Computer/Laptop;Tablet;Smart phone	Google	More than 6 times	Look for medication for specific disease;Look for symptoms and the possible diagnosis;Read more about disease diagnosed by your doctor;Read about medications prescribed by your doctor	At a general search engine such as Google, Bing or Yahoo	Somewhat agree	More than 5 links	Neither disagree nor agree	Somewhat agree	Somewhat agree	Somewhat agree	Somewhat agree	Somewhat agree	Neither disagree nor agree	Neither disagree nor agree	Neither disagree nor agree	Neither disagree nor agree	Neither disagree nor agree	Neither disagree nor agree	Somewhat agree	Neither disagree nor agree	Completely agree	Completely agree	Neither disagree nor agree	Neither disagree nor agree	Somewhat agree	Neither disagree nor agree	Neither disagree nor agree	Completely agree	Completely agree	Somewhat agree	Somewhat agree	Completely agree	Completely agree	I donâ€™t know		Female	26-40	Saudi Arabia	Postgraduate	ÙEducation
2017/02/04 9:44:50 PM GMT+1	7-12 hours	More than 10 years	Tablet;Smart phone	Google	More than 6 times	Look for medication for specific disease;Look for symptoms and the possible diagnosis	YouTube	Completely agree	4-5 links	Completely agree	Completely agree	Completely agree	Completely agree	Completely agree	Completely disagree	Somewhat disagree	Completely agree	Somewhat disagree	Completely agree	Completely agree	Completely agree	Completely agree	Completely agree	Completely agree	Completely agree	Completely agree	Completely agree	Completely agree	Completely agree	Completely agree	Completely agree	Completely agree	Completely agree	Completely agree	Completely agree	Somewhat agree	Medicine of which the effectiveness was demonstrated scientifically in clinical trials.		Male	41-60	Yemen	Graduate/higher diploma	Business related
2017/02/04 9:45:23 PM GMT+1	7-12 hours	More than 10 years	Personal Computer/Laptop	Google	More than 6 times	Look for symptoms and the possible diagnosis	At a general search engine such as Google, Bing or Yahoo	Somewhat agree	4-5 links	Somewhat agree	Completely agree	Somewhat agree	Somewhat agree	Somewhat agree	Somewhat agree	Somewhat disagree	Somewhat disagree	Somewhat disagree	Somewhat disagree	Somewhat disagree	Somewhat disagree	Neither disagree nor agree	Somewhat disagree	Somewhat disagree	Somewhat disagree	Somewhat disagree	Somewhat agree	Neither disagree nor agree	Neither disagree nor agree	Somewhat disagree	Somewhat disagree	Somewhat agree	Somewhat agree	Somewhat agree	Somewhat agree	Somewhat agree	I donâ€™t know		Male	26-40	Yemen		Engineering/Math related
2017/02/04 10:25:08 PM GMT+1	More than 12 hours	More than 10 years	Personal Computer/Laptop;Smart phone	Google	3-5 times	Look for symptoms and the possible diagnosis	At a more general site like Wikipedia, that contains information on all kinds of topics (if you use a search engine to reach a specific site select this option)	Neither disagree nor agree	4-5 links	Somewhat disagree	Completely agree	Somewhat disagree	Somewhat agree	Completely agree	Neither disagree nor agree	Somewhat agree	Somewhat disagree	Somewhat disagree	Completely agree	Completely agree	Completely agree	Somewhat agree	Completely agree	Somewhat agree	Completely agree	Completely disagree	Somewhat disagree	Completely agree	Completely agree	Completely disagree	Somewhat agree	Completely agree	Somewhat disagree	Somewhat disagree	Completely agree	Completely agree	Medicine of which the effectiveness was demonstrated scientifically in clinical trials.	i only look for the symptoms and for medications i search for the effect of the drug and it's side effects if any . i don't relay on the internet for treatments and prescriptions . Good Luck in your studies and will be happy to offer any kind of assistance . Hady Mansour	Male	18-25	Turkey	Graduate/higher diploma	Medical related
2017/02/04 10:34:14 PM GMT+1	Less than 2 hours	More than 10 years	Personal Computer/Laptop;Smart phone	Google	3-5 times	Look for symptoms and the possible diagnosis	At a general search engine such as Google, Bing or Yahoo	Completely agree	2-3 links	Completely disagree	Somewhat agree	Completely disagree	Completely disagree	Completely disagree	Completely disagree	Completely disagree	Somewhat agree	Neither disagree nor agree	Neither disagree nor agree	Completely agree	Completely agree	Somewhat agree	Somewhat agree	Completely agree	Somewhat disagree	Somewhat agree	Somewhat agree	Somewhat agree	Completely agree	Completely disagree	Completely agree	Completely agree	Completely disagree	Neither disagree nor agree	Somewhat agree	Neither disagree nor agree	Medicine of which the effectiveness was demonstrated scientifically in clinical trials.		Male	Prefer not to say	United Kingdom	High school	Engineering/Math related
2017/02/04 10:43:58 PM GMT+1	2-6 hours	More than 10 years	Personal Computer/Laptop;Tablet;Smart phone;Smart TV	Google	1-2 times	Look for medication for specific disease;Look for symptoms and the possible diagnosis	At a general search engine such as Google, Bing or Yahoo	Somewhat agree	2-3 links	Somewhat disagree	Completely agree	Neither disagree nor agree	Somewhat agree	Somewhat disagree	Neither disagree nor agree	Somewhat agree	Neither disagree nor agree	Neither disagree nor agree	Somewhat agree	Completely agree	Somewhat agree	Completely agree	Somewhat agree	Completely agree	Somewhat agree	Neither disagree nor agree	Somewhat agree	Somewhat agree	Completely agree	Somewhat disagree	Completely disagree	Somewhat agree	Somewhat agree	Somewhat agree	Somewhat agree	Somewhat agree	I donâ€™t mind if it has both 1 & 2		Male	18-25	United Kingdom	Graduate/higher diploma	Computer science
2017/02/04 11:03:13 PM GMT+1	2-6 hours	5-10 years	Personal Computer/Laptop;Smart phone	Google	More than 6 times	Look for medication for specific disease;Look for symptoms and the possible diagnosis;Read more about disease diagnosed by your doctor;Read about medications prescribed by your doctor	At a site that specializes in health information, like NHS choices or WebMD (if you use a search engine to reach a specific site select this option)	Somewhat agree	2-3 links	Completely agree	Completely agree	Completely agree	Completely agree	Somewhat agree	Somewhat agree	Somewhat agree	Neither disagree nor agree	Neither disagree nor agree	Neither disagree nor agree	Somewhat agree	Completely agree	Completely agree	Neither disagree nor agree	Somewhat agree	Completely agree	Somewhat agree	Neither disagree nor agree	Neither disagree nor agree	Neither disagree nor agree	Neither disagree nor agree	Completely agree	Completely agree	Somewhat disagree	Somewhat disagree	Completely agree	Somewhat agree	I donâ€™t mind if it has both 1 & 2		Male	18-25	Kosovo	Graduate/higher diploma	Medical related
2017/02/05 12:01:04 AM GMT+1	7-12 hours	More than 10 years	Personal Computer/Laptop;Smart phone	Google	1-2 times	Look for symptoms and the possible diagnosis	At a general search engine such as Google, Bing or Yahoo	Somewhat disagree	2-3 links	Neither disagree nor agree	Somewhat agree	Neither disagree nor agree	Somewhat agree	Neither disagree nor agree	Neither disagree nor agree	Neither disagree nor agree	Neither disagree nor agree	Completely disagree	Completely agree	Neither disagree nor agree	Neither disagree nor agree	Somewhat agree	Somewhat agree	Somewhat agree	Somewhat agree	Somewhat disagree	Neither disagree nor agree	Somewhat agree	Somewhat agree	Neither disagree nor agree	Completely agree	Completely agree	Somewhat agree	Somewhat agree	Somewhat agree	Completely agree	I donâ€™t know	Thank you very much for allowing me to participate in your questionnaire, clearly a strong focus on current affairs in the medical industry. I would however strongly endorse if you could have included the following in your research: 1) What country is the participant responding from...as different countries have different medical systems and norms present in their society. 2) collect feedback if …	Male	18-25	United Kingdom	Graduate/higher diploma	Politics and International Relations
2017/02/05 12:01:26 AM GMT+1	2-6 hours	5-10 years	Smart phone	Google	1-2 times	Look for medication for specific disease;Look for symptoms and the possible diagnosis;Read about medications prescribed by your doctor	At a general search engine such as Google, Bing or Yahoo	Somewhat agree	2-3 links	Completely agree	Somewhat agree	Somewhat agree	Somewhat agree	Somewhat agree	Somewhat agree	Somewhat agree	Somewhat agree	Somewhat agree	Somewhat agree	Somewhat agree	Somewhat agree	Somewhat agree	Somewhat agree	Somewhat agree	Somewhat agree	Somewhat agree	Somewhat agree	Somewhat agree	Somewhat agree	Somewhat agree	Somewhat agree	Somewhat agree	Somewhat agree	Somewhat agree	Somewhat agree	Completely agree	Medicine of which the effectiveness was demonstrated scientifically in clinical trials.		Male	41-60	United Kingdom	Graduate/higher diploma	Business related
2017/02/05 12:15:15 AM GMT+1	7-12 hours	5-10 years	Smart phone	Google	More than 6 times	Look for medication for specific disease;Look for symptoms and the possible diagnosis	At a social network site like Facebook	Somewhat agree	2-3 links	Completely agree	Completely agree	Completely agree	Completely agree	Completely agree	Completely agree	Completely agree	Completely agree	Neither disagree nor agree	Neither disagree nor agree	Completely agree	Somewhat agree	Somewhat agree	Completely agree	Completely agree	Completely agree	Somewhat agree	Completely agree	Somewhat agree	Neither disagree nor agree	Somewhat agree	Completely agree	Completely agree	Completely agree	Completely agree	Completely agree	Completely agree	I donâ€™t mind if it has both 1 & 2	I like these qouestions	Male	18-25	Oman	Postgraduate	Business related
2017/02/05 1:50:09 AM GMT+1	More than 12 hours	5-10 years	Personal Computer/Laptop;Tablet;Smart phone	Google	3-5 times	Look for symptoms and the possible diagnosis;Read more about disease diagnosed by your doctor	At a general search engine such as Google, Bing or Yahoo	Somewhat disagree	2-3 links	Somewhat disagree	Somewhat agree	Somewhat agree	Somewhat agree	Somewhat agree	Somewhat agree	Neither disagree nor agree	Somewhat agree	Neither disagree nor agree	Somewhat agree	Neither disagree nor agree	Somewhat agree	Neither disagree nor agree	Somewhat agree	Neither disagree nor agree	Somewhat agree	Neither disagree nor agree	Somewhat agree	Neither disagree nor agree	Somewhat agree	Neither disagree nor agree	Neither disagree nor agree	Neither disagree nor agree	Neither disagree nor agree	Neither disagree nor agree	Neither disagree nor agree	Neither disagree nor agree	Only alternative medicine (any of a range of medical therapies that are not regarded by medical professionals)		Male	18-25	United Kingdom	Graduate/higher diploma	Business related
2017/02/05 2:34:56 AM GMT+1	More than 12 hours	Less than 3 years	Smart phone	Google	1-2 times	Look for medication for specific disease	At a general search engine such as Google, Bing or Yahoo	Somewhat agree	More than 5 links	Completely disagree	Completely disagree	Completely disagree	Somewhat disagree	Somewhat disagree	Somewhat disagree	Neither disagree nor agree	Neither disagree nor agree	Somewhat disagree	Somewhat disagree	Somewhat disagree	Somewhat disagree	Somewhat agree	Somewhat agree	Somewhat agree	Somewhat agree	Somewhat disagree	Somewhat disagree	Somewhat agree	Somewhat disagree	Somewhat agree	Somewhat agree	Somewhat agree	Somewhat agree	Somewhat disagree	Somewhat disagree	Somewhat disagree	Medicine of which the effectiveness was demonstrated scientifically in clinical trials.		Female	26-40	Indonesia	Graduate/higher diploma
2017/02/05 5:29:19 AM GMT+1	Less than 2 hours	More than 10 years	Personal Computer/Laptop;Tablet;Smart phone	Google	More than 6 times	Look for symptoms and the possible diagnosis	At a general search engine such as Google, Bing or Yahoo	Somewhat agree	2-3 links	Somewhat disagree	Somewhat disagree	Somewhat agree	Somewhat agree	Completely disagree	Somewhat disagree	Somewhat disagree	Somewhat disagree	Neither disagree nor agree	Completely agree	Completely agree	Completely agree	Completely agree	Neither disagree nor agree	Completely agree	Completely agree	Somewhat agree	Neither disagree nor agree	Somewhat agree	Somewhat agree	Neither disagree nor agree	Somewhat agree	Completely agree	Completely agree	Somewhat agree	Completely agree	Somewhat agree	I donâ€™t mind if it has both 1 & 2		Female	18-25	Kuwait	Graduate/higher diploma	Medical related
2017/02/05 7:21:52 AM GMT+1	2-6 hours	3-5 years	Personal Computer/Laptop;Smart phone	Google;Bing;Yahoo!	3-5 times	Look for medication for specific disease;Look for symptoms and the possible diagnosis;Read more about disease diagnosed by your doctor;Read about medications prescribed by your doctor	At a more general site like Wikipedia, that contains information on all kinds of topics (if you use a search engine to reach a specific site select this option)	Somewhat disagree	More than 5 links	Somewhat agree	Somewhat agree	Somewhat agree	Completely agree	Completely agree	Neither disagree nor agree	Completely agree	Completely agree	Completely agree	Neither disagree nor agree	Somewhat agree	Somewhat agree	Somewhat agree	Completely agree	Completely agree	Completely agree	Completely agree	Completely agree	Completely agree	Completely agree	Somewhat agree	Somewhat agree	Completely agree	Completely agree	Completely agree	Completely agree	Completely agree	Only alternative medicine (any of a range of medical therapies that are not regarded by medical professionals)		Male	26-40	Turkey	Postgraduate	Demography
2017/02/05 7:45:03 AM GMT+1	More than 12 hours	More than 10 years	Personal Computer/Laptop;Smart phone	Google	More than 6 times	Look for medication for specific disease;Look for symptoms and the possible diagnosis;Read more about disease diagnosed by your doctor;Read about medications prescribed by your doctor	At a general search engine such as Google, Bing or Yahoo	Neither disagree nor agree	2-3 links	Completely disagree	Completely agree	Completely disagree	Neither disagree nor agree	Completely disagree	Completely disagree	Completely agree	Neither disagree nor agree	Somewhat agree	Completely agree	Completely disagree	Somewhat disagree	Completely disagree	Somewhat agree	Somewhat agree	Completely agree	Neither disagree nor agree	Neither disagree nor agree	Completely agree	Completely disagree	Completely disagree	Completely agree	Completely agree	Completely agree	Completely agree	Completely agree	Completely agree	I donâ€™t mind if it has both 1 & 2		Male	18-25	Turkey	Graduate/higher diploma	Medical related
2017/02/05 8:05:48 AM GMT+1	2-6 hours	More than 10 years	Tablet;Smart phone	Google	More than 6 times	Look for symptoms and the possible diagnosis;Read more about disease diagnosed by your doctor;Read about medications prescribed by your doctor	At a general search engine such as Google, Bing or Yahoo	Somewhat agree	2-3 links	Neither disagree nor agree	Neither disagree nor agree	Somewhat agree	Somewhat agree	Somewhat agree	Neither disagree nor agree	Neither disagree nor agree	Somewhat agree	Somewhat disagree	Somewhat disagree	Completely agree	Completely agree	Completely agree	Neither disagree nor agree	Somewhat agree	Completely agree	Somewhat disagree	Somewhat agree	Somewhat disagree	Somewhat agree	Completely disagree	Completely agree	Completely agree	Somewhat disagree	Completely disagree	Somewhat agree	Completely agree	I donâ€™t mind if it has both 1 & 2		Male	18-25	Azerbaijan	Graduate/higher diploma	Medical related
2017/02/05 11:03:22 AM GMT+1	7-12 hours	5-10 years	Personal Computer/Laptop;Smart phone	Google	1-2 times	Look for symptoms and the possible diagnosis	At a general search engine such as Google, Bing or Yahoo	Neither disagree nor agree	2-3 links	Somewhat agree	Neither disagree nor agree	Completely agree	Neither disagree nor agree	Neither disagree nor agree	Neither disagree nor agree	Neither disagree nor agree	Neither disagree nor agree	Somewhat agree	Somewhat agree	Somewhat agree	Somewhat agree	Somewhat agree	Somewhat agree	Somewhat agree	Somewhat agree	Somewhat agree	Somewhat agree	Somewhat disagree	Completely agree	Neither disagree nor agree	Completely agree	Completely agree	Neither disagree nor agree	Neither disagree nor agree	Completely agree	Completely agree	Medicine of which the effectiveness was demonstrated scientifically in clinical trials.		Female	18-25	United Kingdom	Graduate/higher diploma	Arts related
2017/02/05 11:16:58 AM GMT+1	More than 12 hours	5-10 years	Personal Computer/Laptop;Smart phone	Google	1-2 times	Look for medication for specific disease;Look for symptoms and the possible diagnosis	At a general search engine such as Google, Bing or Yahoo	Neither disagree nor agree	More than 5 links	Somewhat disagree	Somewhat disagree	Neither disagree nor agree	Somewhat disagree	Completely agree	Completely disagree	Somewhat disagree	Completely disagree	Somewhat disagree	Somewhat agree	Neither disagree nor agree	Completely disagree	Completely disagree	Completely disagree	Neither disagree nor agree	Somewhat agree	Somewhat disagree	Neither disagree nor agree	Somewhat disagree	Somewhat disagree	Somewhat disagree	Neither disagree nor agree	Neither disagree nor agree	Somewhat disagree	Somewhat disagree	Somewhat disagree	Neither disagree nor agree	Only alternative medicine (any of a range of medical therapies that are not regarded by medical professionals)		Male	18-25	United Kingdom	High school	Business related
2017/02/05 11:42:35 AM GMT+1	2-6 hours	More than 10 years	Personal Computer/Laptop;Smart phone	Google	3-5 times	Look for medication for specific disease	At a general search engine such as Google, Bing or Yahoo	Somewhat agree	2-3 links	Somewhat agree	Somewhat agree	Completely agree	Neither disagree nor agree	Completely agree	Somewhat agree	Somewhat agree	Somewhat agree	Neither disagree nor agree	Completely agree	Completely agree	Somewhat agree	Somewhat agree	Completely agree	Completely agree	Completely agree	Completely agree	Completely agree	Somewhat agree	Completely agree	Somewhat agree	Completely agree	Completely agree	Somewhat agree	Somewhat agree	Completely agree	Somewhat disagree	I donâ€™t mind if it has both 1 & 2		Male	26-40	Yemen	Postgraduate	Engineering/Math related
2017/02/05 3:46:09 PM GMT+1	Less than 2 hours	3-5 years	Personal Computer/Laptop;Smart phone	Google	3-5 times	Read more about disease diagnosed by your doctor	At a general search engine such as Google, Bing or Yahoo	Somewhat disagree	More than 5 links	Completely disagree	Completely disagree	Completely disagree	Completely disagree	Completely disagree	Completely disagree	Completely disagree	Completely disagree	Completely disagree	Completely disagree	Completely disagree	Completely disagree	Completely disagree	Completely disagree	Completely agree	Neither disagree nor agree	Neither disagree nor agree	Completely agree	Completely agree	Neither disagree nor agree	Neither disagree nor agree	Completely agree	Completely agree	Completely agree	Completely agree	Neither disagree nor agree	Completely agree	I donâ€™t know		Male	18-25	Oman	Postgraduate	Business related
2017/02/05 4:01:55 PM GMT+1	Less than 2 hours	Less than 3 years	Personal Computer/Laptop;Tablet;Smart phone	Google	1-2 times	Look for medication for specific disease	At a general search engine such as Google, Bing or Yahoo	Neither disagree nor agree	More than 5 links	Completely agree	Completely agree	Somewhat agree	Neither disagree nor agree	Completely agree	Completely agree	Neither disagree nor agree	Somewhat agree	Somewhat disagree	Neither disagree nor agree	Neither disagree nor agree	Somewhat agree	Somewhat agree	Completely agree	Completely agree	Completely agree	Somewhat disagree	Completely agree	Completely agree	Completely agree	Somewhat agree	Neither disagree nor agree	Somewhat agree	Somewhat agree	Somewhat agree	Somewhat agree	Somewhat disagree	I donâ€™t know		Male	26-40	Yemen	Postgraduate	Business related
2017/02/05 4:36:06 PM GMT+1	2-6 hours	5-10 years	Personal Computer/Laptop;Smart phone	Google	More than 6 times	Look for medication for specific disease;Look for symptoms and the possible diagnosis;Read more about disease diagnosed by your doctor;Read about medications prescribed by your doctor	At a site that specializes in health information, like NHS choices or WebMD (if you use a search engine to reach a specific site select this option)	Neither disagree nor agree	2-3 links	Completely agree	Completely agree	Somewhat agree	Neither disagree nor agree	Somewhat agree	Somewhat agree	Neither disagree nor agree	Somewhat agree	Neither disagree nor agree	Completely agree	Completely agree	Somewhat agree	Somewhat agree	Somewhat agree	Completely agree	Somewhat agree	Completely disagree	Somewhat agree	Neither disagree nor agree	Neither disagree nor agree	Completely agree	Completely agree	Completely agree	Somewhat agree	Completely agree	Completely agree	Somewhat agree	I donâ€™t know		Female	26-40	Yemen	Postgraduate	Medical related
2017/02/05 4:47:00 PM GMT+1	Less than 2 hours	5-10 years	Personal Computer/Laptop;Smart phone	Google	More than 6 times	Look for symptoms and the possible diagnosis	At a general search engine such as Google, Bing or Yahoo	Somewhat agree	4-5 links	Completely agree	Completely agree	Completely disagree	Completely agree	Neither disagree nor agree	Somewhat disagree	Neither disagree nor agree	Somewhat agree	Neither disagree nor agree	Completely agree	Completely agree	Completely agree	Completely agree	Completely agree	Completely agree	Completely agree	Completely agree	Completely agree	Neither disagree nor agree	Somewhat agree	Somewhat agree	Completely agree	Somewhat agree	Completely agree	Neither disagree nor agree	Neither disagree nor agree	Completely disagree	I donâ€™t know		Female	26-40	Yemen	Postgraduate
2017/02/05 7:49:26 PM GMT+1	7-12 hours	More than 10 years	Personal Computer/Laptop	Google	More than 6 times	Read more about disease diagnosed by your doctor	At a general search engine such as Google, Bing or Yahoo	Somewhat agree	2-3 links	Somewhat disagree	Somewhat disagree	Completely agree	Completely agree	Completely disagree	Somewhat disagree	Somewhat agree	Completely agree	Completely disagree	Somewhat disagree	Completely disagree	Completely disagree	Completely disagree	Somewhat agree	Completely disagree	Completely disagree	Completely disagree	Somewhat disagree	Completely agree	Completely agree	Completely agree	Completely disagree	Completely agree	Completely agree	Somewhat agree	Neither disagree nor agree	Somewhat disagree	Medicine of which the effectiveness was demonstrated scientifically in clinical trials.		Male	41-60	Germany	Graduate/higher diploma	Engineering/Math related
2017/02/05 7:50:00 PM GMT+1	7-12 hours	3-5 years	Tablet;Smart phone	Google	More than 6 times	Look for symptoms and the possible diagnosis	At a general search engine such as Google, Bing or Yahoo	Somewhat agree	2-3 links	Completely disagree	Completely disagree	Completely agree	Somewhat agree	Somewhat disagree	Somewhat agree	Somewhat agree	Somewhat agree	Somewhat disagree	Somewhat disagree	Somewhat agree	Somewhat agree	Somewhat agree	Somewhat disagree	Somewhat agree	Somewhat agree	Neither disagree nor agree	Somewhat agree	Completely disagree	Somewhat agree	Completely agree	Completely disagree	Completely agree	Completely agree	Somewhat disagree	Neither disagree nor agree	Somewhat agree	Medicine of which the effectiveness was demonstrated scientifically in clinical trials.		Male	18-25	Germany	High school	Medical related
2017/02/05 8:18:24 PM GMT+1	2-6 hours	More than 10 years	Personal Computer/Laptop;Smart phone	Google	More than 6 times	Look for medication for specific disease;Look for symptoms and the possible diagnosis	At a general search engine such as Google, Bing or Yahoo	Somewhat agree	More than 5 links	Somewhat disagree	Somewhat agree	Completely agree	Somewhat disagree	Completely disagree	Completely disagree	Completely disagree	Completely disagree	Completely disagree	Completely disagree	Completely agree	Completely agree	Completely agree	Completely agree	Completely agree	Somewhat disagree	Completely disagree	Completely agree	Somewhat agree	Completely disagree	Somewhat agree	Completely agree	Completely agree	Completely agree	Somewhat disagree	Completely agree	Completely agree	I donâ€™t mind if it has both 1 & 2		Male	26-40	Yemen	Postgraduate	Engineering/Math related
2017/02/06 4:52:47 AM GMT+1	Less than 2 hours	More than 10 years	Personal Computer/Laptop;Smart phone	Google;Bing	More than 6 times	Look for medication for specific disease;Look for symptoms and the possible diagnosis;Read more about disease diagnosed by your doctor;Read about medications prescribed by your doctor	At a site that specializes in health information, like NHS choices or WebMD (if you use a search engine to reach a specific site select this option)	Somewhat disagree	More than 5 links	Completely agree	Somewhat agree	Completely agree	Completely agree	Neither disagree nor agree	Neither disagree nor agree	Somewhat agree	Somewhat agree	Somewhat agree	Completely agree	Somewhat agree	Somewhat agree	Completely agree	Completely agree	Completely agree	Completely agree	Somewhat agree	Somewhat agree	Somewhat agree	Somewhat agree	Neither disagree nor agree	Somewhat disagree	Somewhat agree	Somewhat agree	Neither disagree nor agree	Somewhat agree	Completely agree	Medicine of which the effectiveness was demonstrated scientifically in clinical trials.		Male	26-40	Yemen	Postgraduate	Engineering/Math related
2017/02/06 8:55:32 AM GMT+1	7-12 hours	More than 10 years	Personal Computer/Laptop;Smart phone	Google;Bing	1-2 times	Read more about disease diagnosed by your doctor	At a general search engine such as Google, Bing or Yahoo	Somewhat agree	More than 5 links	Neither disagree nor agree	Neither disagree nor agree	Somewhat agree	Completely disagree	Somewhat disagree	Neither disagree nor agree	Somewhat disagree	Neither disagree nor agree	Neither disagree nor agree	Somewhat disagree	Somewhat disagree	Neither disagree nor agree	Somewhat agree	Neither disagree nor agree	Somewhat agree	Completely disagree	Somewhat disagree	Somewhat agree	Completely agree	Neither disagree nor agree	Neither disagree nor agree	Completely disagree	Neither disagree nor agree	Somewhat agree	Somewhat disagree	Somewhat disagree	Completely agree	I donâ€™t know		Male	26-40	Yemen	Postgraduate	Engineering/Math related
2017/02/06 10:07:51 AM GMT+1	2-6 hours	More than 10 years	Smart phone	Google	More than 6 times	Look for medication for specific disease;Read more about disease diagnosed by your doctor	At a more general site like Wikipedia, that contains information on all kinds of topics (if you use a search engine to reach a specific site select this option)	Somewhat agree	4-5 links	Somewhat disagree	Somewhat disagree	Somewhat disagree	Somewhat disagree	Somewhat disagree	Neither disagree nor agree	Somewhat agree	Somewhat disagree	Somewhat disagree	Neither disagree nor agree	Somewhat disagree	Completely disagree	Completely disagree	Somewhat disagree	Somewhat agree	Neither disagree nor agree	Somewhat disagree	Somewhat agree	Neither disagree nor agree	Somewhat disagree	Neither disagree nor agree	Neither disagree nor agree	Somewhat disagree	Neither disagree nor agree	Somewhat disagree	Somewhat agree	Neither disagree nor agree	I donâ€™t know		Male	41-60		Graduate/higher diploma	Business related
2017/02/06 4:07:04 PM GMT+1	7-12 hours	More than 10 years	Personal Computer/Laptop;Tablet;Smart phone	Google	1-2 times	Read more about disease diagnosed by your doctor	At a general search engine such as Google, Bing or Yahoo	Neither disagree nor agree	2-3 links	Neither disagree nor agree	Somewhat agree	Somewhat agree	Somewhat agree	Somewhat agree	Somewhat agree	Neither disagree nor agree	Neither disagree nor agree	Somewhat agree	Neither disagree nor agree	Somewhat agree	Somewhat agree	Somewhat agree	Somewhat agree	Somewhat agree	Completely agree	Completely agree	Somewhat agree	Somewhat agree	Somewhat agree	Neither disagree nor agree	Completely agree	Somewhat agree	Somewhat agree	Somewhat agree	Completely agree	Somewhat agree	Only alternative medicine (any of a range of medical therapies that are not regarded by medical professionals)		Male	26-40	Nigeria	Postgraduate	Engineering/Math related
2017/02/06 4:30:16 PM GMT+1	Less than 2 hours	5-10 years	Personal Computer/Laptop;Tablet;Smart phone	Google	More than 6 times	Look for medication for specific disease;Look for symptoms and the possible diagnosis;Read more about disease diagnosed by your doctor;Alternative Medicine: As home remedies	At a general search engine such as Google, Bing or Yahoo	Neither disagree nor agree	4-5 links	Completely disagree	Completely disagree	Completely disagree	Somewhat agree	Neither disagree nor agree	Neither disagree nor agree	Neither disagree nor agree	Neither disagree nor agree	Neither disagree nor agree	Somewhat agree	Neither disagree nor agree	Neither disagree nor agree	Neither disagree nor agree	Neither disagree nor agree	Neither disagree nor agree	Somewhat disagree	Somewhat disagree	Neither disagree nor agree	Neither disagree nor agree	Somewhat disagree	Neither disagree nor agree	Neither disagree nor agree	Somewhat agree	Somewhat agree	Somewhat agree	Somewhat agree	Completely agree	I donâ€™t mind if it has both 1 & 2	I never trust websites, but the information. Personally, I trust the agreed information among several websites.	Male	26-40	Saudi Arabia	Graduate/higher diploma	Engineering/Math related
2017/02/06 8:39:30 PM GMT+1	7-12 hours	More than 10 years	Personal Computer/Laptop;Tablet;Smart phone	Google	More than 6 times	Look for symptoms and the possible diagnosis;Read more about disease diagnosed by your doctor	At a general search engine such as Google, Bing or Yahoo	Neither disagree nor agree	More than 5 links	Completely agree	Completely agree	Completely agree	Completely agree	Completely agree	Completely agree	Completely agree	Completely agree	Completely agree	Completely agree	Completely agree	Completely agree	Completely agree	Completely agree	Completely agree	Completely agree	Somewhat agree	Completely agree	Completely agree	Somewhat disagree	Completely agree	Completely agree	Completely agree	Somewhat agree	Somewhat agree	Somewhat disagree	Completely agree	Medicine of which the effectiveness was demonstrated scientifically in clinical trials.	I trust wesites that belong to hospitals.	Male	26-40	New Zealand	Postgraduate	Arts related
2017/02/06 9:21:31 PM GMT+1	7-12 hours	More than 10 years	Smart phone	Google	More than 6 times	Look for medication for specific disease;Look for symptoms and the possible diagnosis;Read more about disease diagnosed by your doctor;Read about medications prescribed by your doctor;Look for the symptoms, knowing about the diagnosis	At a general search engine such as Google, Bing or Yahoo	Neither disagree nor agree	4-5 links	Somewhat agree	Somewhat agree	Somewhat disagree	Somewhat agree	Somewhat agree	Somewhat disagree	Completely disagree	Neither disagree nor agree	Completely disagree	Completely disagree	Completely agree	Completely agree	Completely agree	Somewhat agree	Completely agree	Completely agree	Completely agree	Completely agree	Completely agree	Somewhat agree	Somewhat disagree	Completely agree	Completely agree	Completely agree	Completely agree	Completely agree	Completely agree	I donâ€™t know	For the last question, I can't trust any online prescriptions , because I may draw a wrong conclusion!	Male	18-25	Yemen	Graduate/higher diploma	Engineering/Math related
2017/02/06 9:26:25 PM GMT+1	2-6 hours	More than 10 years	Personal Computer/Laptop;Smart phone	Google	More than 6 times	Look for symptoms and the possible diagnosis;Read more about disease diagnosed by your doctor	At a general search engine such as Google, Bing or Yahoo	Somewhat agree	2-3 links	Somewhat agree	Completely agree	Somewhat agree	Somewhat agree	Completely agree	Neither disagree nor agree	Somewhat agree	Neither disagree nor agree	Neither disagree nor agree	Somewhat agree	Completely agree	Completely agree	Completely agree	Neither disagree nor agree	Somewhat agree	Neither disagree nor agree	Somewhat agree	Completely agree	Neither disagree nor agree	Somewhat agree	Somewhat agree	Completely agree	Completely agree	Somewhat agree	Somewhat agree	Somewhat agree	Completely agree	I donâ€™t mind if it has both 1 & 2	I prefer local webpages that can provide specific information about the health issue as well as some available medicines in my country	Male	26-40	New Zealand	Postgraduate	Engineering/Math related
2017/02/07 12:13:55 AM GMT+1	More than 12 hours	5-10 years	Personal Computer/Laptop;Tablet;Smart phone	Google;Yahoo!	More than 6 times	Look for symptoms and the possible diagnosis	At a general search engine such as Google, Bing or Yahoo	Somewhat disagree	4-5 links	Somewhat agree	Completely agree	Somewhat agree	Somewhat disagree	Neither disagree nor agree	Completely disagree	Somewhat disagree	Somewhat agree	Somewhat disagree	Neither disagree nor agree	Somewhat agree	Somewhat disagree	Neither disagree nor agree	Neither disagree nor agree	Neither disagree nor agree	Somewhat disagree	Somewhat disagree	Somewhat agree	Somewhat disagree	Somewhat agree	Neither disagree nor agree	Somewhat disagree	Somewhat disagree	Somewhat disagree	Somewhat disagree	Neither disagree nor agree	Somewhat agree	Medicine of which the effectiveness was demonstrated scientifically in clinical trials.		Male	41-60	Indonesia	Postgraduate	educational management
2017/02/07 12:43:57 AM GMT+1	2-6 hours	More than 10 years	Smart phone	Google	More than 6 times	Look for symptoms and the possible diagnosis	At a general search engine such as Google, Bing or Yahoo	Somewhat agree	More than 5 links	Somewhat disagree	Completely agree	Completely agree	Somewhat disagree	Somewhat agree	Somewhat disagree	Somewhat disagree	Completely disagree	Somewhat agree	Somewhat agree	Completely agree	Somewhat agree	Completely agree	Somewhat agree	Completely agree	Somewhat agree	Completely agree	Completely agree	Somewhat agree	Completely agree	Somewhat agree	Completely agree	Completely agree	Completely agree	Completely agree	Completely agree	Somewhat disagree	I donâ€™t mind if it has both 1 & 2		Male	26-40	Jordan	Postgraduate	Arts related
2017/02/07 12:59:42 AM GMT+1	2-6 hours	More than 10 years	Personal Computer/Laptop;Smart phone	Google	More than 6 times	Look for medication for specific disease;Look for symptoms and the possible diagnosis;Read more about disease diagnosed by your doctor;Read about medications prescribed by your doctor	At a more general site like Wikipedia, that contains information on all kinds of topics (if you use a search engine to reach a specific site select this option)	Somewhat agree	More than 5 links	Neither disagree nor agree	Somewhat agree	Somewhat agree	Somewhat agree	Somewhat agree	Somewhat agree	Somewhat agree	Neither disagree nor agree	Neither disagree nor agree	Somewhat agree	Somewhat agree	Somewhat agree	Somewhat agree	Somewhat agree	Completely agree	Somewhat agree	Neither disagree nor agree	Somewhat agree	Neither disagree nor agree	Completely disagree	Neither disagree nor agree	Completely agree	Completely agree	Completely agree	Completely agree	Completely agree	Somewhat agree	I donâ€™t mind if it has both 1 & 2		Male	26-40	New Zealand	Graduate/higher diploma	Business related
2017/02/07 1:43:42 AM GMT+1	2-6 hours	More than 10 years	Personal Computer/Laptop;Smart phone	Google	More than 6 times	Look for symptoms and the possible diagnosis;Read more about disease diagnosed by your doctor;Read about medications prescribed by your doctor	At a general search engine such as Google, Bing or Yahoo	Somewhat agree	2-3 links	Somewhat agree	Neither disagree nor agree	Somewhat agree	Somewhat agree	Neither disagree nor agree	Neither disagree nor agree	Neither disagree nor agree	Neither disagree nor agree	Neither disagree nor agree	Neither disagree nor agree	Completely agree	Completely agree	Somewhat agree	Somewhat agree	Completely agree	Somewhat agree	Somewhat agree	Somewhat agree	Somewhat agree	Somewhat agree	Somewhat agree	Completely agree	Completely agree	Completely agree	Somewhat agree	Completely agree	Completely agree	I donâ€™t know		Male	18-25	Canada	High school	Engineering/Math related
2017/02/07 6:06:35 AM GMT+1	2-6 hours	More than 10 years	Personal Computer/Laptop;Smart phone	Google	3-5 times	Look for medication for specific disease;Look for symptoms and the possible diagnosis;Look for more details about a specific hospital	At a general search engine such as Google, Bing or Yahoo	Somewhat agree	2-3 links	Neither disagree nor agree	Neither disagree nor agree	Neither disagree nor agree	Neither disagree nor agree	Neither disagree nor agree	Neither disagree nor agree	Neither disagree nor agree	Neither disagree nor agree	Neither disagree nor agree	Somewhat agree	Somewhat agree	Somewhat agree	Neither disagree nor agree	Somewhat agree	Somewhat agree	Completely agree	Somewhat agree	Somewhat agree	Somewhat agree	Somewhat agree	Neither disagree nor agree	Somewhat agree	Completely agree	Completely agree	Somewhat agree	Somewhat agree	Somewhat agree	I donâ€™t mind if it has both 1 & 2		Male	26-40	Malaysia	Graduate/higher diploma	IT
2017/02/07 6:24:19 AM GMT+1	2-6 hours	More than 10 years	Personal Computer/Laptop;Smart phone	Google	More than 6 times	Look for medication for specific disease;Look for symptoms and the possible diagnosis;Read about medications prescribed by your doctor	At a general search engine such as Google, Bing or Yahoo	Completely agree	More than 5 links	Neither disagree nor agree	Completely agree	Completely agree	Completely agree	Completely disagree	Completely agree	Completely disagree	Completely disagree	Completely agree	Completely disagree	Completely agree	Completely agree	Completely agree	Completely agree	Completely agree	Completely agree	Completely disagree	Completely agree	Completely agree	Completely agree	Completely disagree	Completely agree	Completely agree	Completely agree	Completely agree	Completely agree	Completely disagree	I donâ€™t mind if it has both 1 & 2		Male	26-40	Australia	Postgraduate	Engineering/Math related
2017/02/07 10:03:22 AM GMT+1	Less than 2 hours	5-10 years	Personal Computer/Laptop;Smart phone	Google;Bing;Yahoo!	3-5 times	Look for medication for specific disease;Look for symptoms and the possible diagnosis;Read more about disease diagnosed by your doctor	At a general search engine such as Google, Bing or Yahoo	Somewhat disagree	2-3 links	Somewhat agree	Completely agree	Somewhat agree	Completely agree	Completely agree	Somewhat disagree	Somewhat agree	Neither disagree nor agree	Somewhat agree	Somewhat agree	Completely agree	Completely agree	Somewhat agree	Completely agree	Somewhat agree	Neither disagree nor agree	Completely disagree	Somewhat agree	Completely agree	Somewhat agree	Neither disagree nor agree	Somewhat disagree	Somewhat agree	Somewhat agree	Completely agree	Somewhat agree	Completely agree	I donâ€™t know		Male	41-60	Yemen	Graduate/higher diploma	Engineering/Math related
2017/02/07 10:51:48 AM GMT+1	Less than 2 hours	Less than 3 years	Personal Computer/Laptop;Smart phone	Google	1-2 times	Look for medication for specific disease	At a general search engine such as Google, Bing or Yahoo	Neither disagree nor agree	4-5 links	Neither disagree nor agree	Neither disagree nor agree	Neither disagree nor agree	Somewhat agree	Neither disagree nor agree	Neither disagree nor agree	Neither disagree nor agree	Neither disagree nor agree	Neither disagree nor agree	Neither disagree nor agree	Neither disagree nor agree	Neither disagree nor agree	Neither disagree nor agree	Neither disagree nor agree	Neither disagree nor agree	Neither disagree nor agree	Neither disagree nor agree	Neither disagree nor agree	Neither disagree nor agree	Neither disagree nor agree	Neither disagree nor agree	Neither disagree nor agree	Neither disagree nor agree	Neither disagree nor agree	Neither disagree nor agree	Neither disagree nor agree	Somewhat disagree	I donâ€™t mind if it has both 1 & 2		Male	18-25	Yemen	Graduate/higher diploma	Engineering/Math related
2017/02/07 12:00:08 PM GMT+1	2-6 hours	More than 10 years	Personal Computer/Laptop;Smart phone	Google	More than 6 times	Look for medication for specific disease;Look for symptoms and the possible diagnosis;Read more about disease diagnosed by your doctor	At a general search engine such as Google, Bing or Yahoo	Neither disagree nor agree	2-3 links	Neither disagree nor agree	Somewhat agree	Somewhat agree	Somewhat agree	Neither disagree nor agree	Somewhat disagree	Somewhat agree	Somewhat agree	Neither disagree nor agree	Neither disagree nor agree	Somewhat agree	Somewhat agree	Somewhat agree	Neither disagree nor agree	Neither disagree nor agree	Neither disagree nor agree	Neither disagree nor agree	Neither disagree nor agree	Neither disagree nor agree	Neither disagree nor agree	Somewhat disagree	Somewhat agree	Somewhat agree	Somewhat agree	Neither disagree nor agree	Neither disagree nor agree	Neither disagree nor agree	I donâ€™t mind if it has both 1 & 2		Female	26-40	United Kingdom	Postgraduate	Business related
2017/02/07 6:31:06 PM GMT+1	More than 12 hours	More than 10 years	Personal Computer/Laptop;Smart phone	Google	More than 6 times	Look for medication for specific disease;Read more about disease diagnosed by your doctor	At a site that specializes in health information, like NHS choices or WebMD (if you use a search engine to reach a specific site select this option)	Somewhat agree	4-5 links	Completely agree	Completely agree	Completely agree	Somewhat agree	Neither disagree nor agree	Completely disagree	Neither disagree nor agree	Somewhat agree	Somewhat agree	Completely disagree	Somewhat disagree	Somewhat disagree	Somewhat agree	Neither disagree nor agree	Completely agree	Somewhat agree	Somewhat disagree	Somewhat agree	Somewhat disagree	Somewhat agree	Neither disagree nor agree	Somewhat agree	Neither disagree nor agree	Somewhat agree	Somewhat agree	Somewhat agree	Somewhat agree	Medicine of which the effectiveness was demonstrated scientifically in clinical trials.		Male	26-40	United Kingdom	Graduate/higher diploma	Engineering/Math related
2017/02/08 3:06:33 AM GMT+1	2-6 hours	More than 10 years	Personal Computer/Laptop;Smart phone	Google	3-5 times	Look for medication for specific disease;Look for symptoms and the possible diagnosis	At a general search engine such as Google, Bing or Yahoo	Somewhat agree	More than 5 links	Somewhat agree	Completely agree	Somewhat agree	Completely agree	Completely agree	Completely agree	Somewhat agree	Completely agree	Somewhat agree	Somewhat disagree	Completely agree	Completely agree	Completely agree	Completely agree	Completely agree	Completely agree	Somewhat disagree	Completely agree	Completely agree	Somewhat agree	Somewhat agree	Somewhat agree	Completely agree	Completely agree	Completely agree	Completely agree	Somewhat agree	Medicine of which the effectiveness was demonstrated scientifically in clinical trials.	think about having an access to previous patients that have been already cured. It could be trustworthy to get in touch with some of them who have similar health issue.	Male	26-40	Saudi Arabia	Postgraduate	Engineering/Math related
2017/02/08 8:53:33 AM GMT+1	More than 12 hours	More than 10 years	Personal Computer/Laptop;Smart phone	Google	More than 6 times	Look for medication for specific disease;Look for symptoms and the possible diagnosis;Read more about disease diagnosed by your doctor;Read about medications prescribed by your doctor	At a general search engine such as Google, Bing or Yahoo	Somewhat agree	More than 5 links	Somewhat agree	Somewhat agree	Somewhat disagree	Somewhat disagree	Somewhat disagree	Neither disagree nor agree	Neither disagree nor agree	Neither disagree nor agree	Somewhat disagree	Somewhat agree	Somewhat agree	Somewhat agree	Completely agree	Somewhat agree	Somewhat agree	Somewhat agree	Somewhat agree	Neither disagree nor agree	Somewhat agree	Neither disagree nor agree	Neither disagree nor agree	Somewhat agree	Completely agree	Completely agree	Completely agree	Completely agree	Somewhat agree	Medicine of which the effectiveness was demonstrated scientifically in clinical trials.		Male	26-40	Saudi Arabia	Postgraduate	Engineering/Math related
2017/02/08 11:10:07 AM GMT+1	2-6 hours	More than 10 years	Personal Computer/Laptop	Google;Bing	More than 6 times	Look for medication for specific disease;Look for symptoms and the possible diagnosis;Read more about disease diagnosed by your doctor;Read about medications prescribed by your doctor	At a general search engine such as Google, Bing or Yahoo	Somewhat agree	More than 5 links	Somewhat agree	Somewhat agree	Somewhat agree	Somewhat agree	Somewhat agree	Somewhat agree	Somewhat agree	Somewhat agree	Somewhat agree	Completely agree	Completely agree	Completely agree	Somewhat agree	Completely agree	Completely agree	Completely agree	Completely agree	Completely agree	Completely agree	Completely agree	Somewhat agree	Somewhat agree	Somewhat agree	Completely agree	Completely agree	Completely agree	Completely agree	I donâ€™t know		Male	26-40	Yemen	Graduate/higher diploma	Business related
2017/02/08 11:30:01 AM GMT+1	2-6 hours	3-5 years	Personal Computer/Laptop;Smart phone	Google	1-2 times	Look for medication for specific disease;Read more about disease diagnosed by your doctor	At a general search engine such as Google, Bing or Yahoo	Somewhat disagree	2-3 links	Somewhat agree	Somewhat agree	Somewhat agree	Completely agree	Neither disagree nor agree	Neither disagree nor agree	Somewhat disagree	Neither disagree nor agree	Somewhat disagree	Completely disagree	Somewhat disagree	Somewhat disagree	Neither disagree nor agree	Somewhat agree	Completely agree	Completely agree	Completely agree	Somewhat agree	Somewhat agree	Neither disagree nor agree	Somewhat disagree	Neither disagree nor agree	Somewhat agree	Somewhat agree	Completely agree	Completely agree	Completely disagree	Medicine of which the effectiveness was demonstrated scientifically in clinical trials.	I think it would be more helpfully if patient could contact a doctor in direct communication and ask for advices or how he/she can be treated . That's all hope you success desk research :-):-)	Male	18-25	Oman	Graduate/higher diploma	Business related
2017/02/08 3:10:40 PM GMT+1	2-6 hours	More than 10 years	Personal Computer/Laptop	Google	More than 6 times	Look for medication for specific disease;Look for symptoms and the possible diagnosis;Read more about disease diagnosed by your doctor;Read about medications prescribed by your doctor	At a site that specializes in health information, like NHS choices or WebMD (if you use a search engine to reach a specific site select this option)	Somewhat agree	2-3 links	Completely agree	Completely agree	Completely agree	Completely agree	Neither disagree nor agree	Neither disagree nor agree	Somewhat agree	Somewhat agree	Somewhat agree	Completely agree	Completely agree	Completely agree	Completely agree	Neither disagree nor agree	Somewhat agree	Completely agree	Completely disagree	Somewhat disagree	Somewhat disagree	Completely agree	Somewhat disagree	Completely agree	Completely agree	Completely agree	Somewhat agree	Completely agree	Completely agree	Medicine of which the effectiveness was demonstrated scientifically in clinical trials.		Female	18-25	United Kingdom	Graduate/higher diploma	Medical related
2017/02/09 9:38:59 AM GMT+1	7-12 hours	5-10 years	Personal Computer/Laptop;Smart phone	Google	1-2 times	Read about medications prescribed by your doctor	At a general search engine such as Google, Bing or Yahoo	Somewhat agree	More than 5 links	Neither disagree nor agree	Somewhat agree	Completely agree	Somewhat agree	Completely agree	Completely agree	Somewhat agree	Completely agree	Completely agree	Somewhat agree	Completely agree	Completely agree	Completely agree	Completely agree	Completely agree	Neither disagree nor agree	Completely disagree	Completely agree	Somewhat agree	Somewhat agree	Somewhat agree	Completely agree	Completely agree	Completely agree	Completely agree	Completely agree	Neither disagree nor agree	I donâ€™t mind if it has both 1 & 2		Male	26-40	Yemen	Postgraduate	Business related
2017/02/09 11:38:52 AM GMT+1	7-12 hours	5-10 years	Personal Computer/Laptop;Tablet	Google;Yahoo!	3-5 times	Look for symptoms and the possible diagnosis;Read more about disease diagnosed by your doctor	At a more general site like Wikipedia, that contains information on all kinds of topics (if you use a search engine to reach a specific site select this option)	Somewhat agree	2-3 links	Somewhat agree	Completely agree	Somewhat agree	Completely agree	Completely agree	Completely agree	Completely agree	Somewhat agree	Somewhat agree	Completely agree	Completely agree	Completely agree	Completely agree	Completely agree	Completely agree	Completely agree	Somewhat agree	Completely agree	Completely agree	Somewhat disagree	Somewhat agree	Completely agree	Completely agree	Completely agree	Completely agree	Completely agree	Neither disagree nor agree	Medicine of which the effectiveness was demonstrated scientifically in clinical trials.		Male	41-60	Saudi Arabia	Graduate/higher diploma	Engineering/Math related
2017/02/09 1:32:28 PM GMT+1	7-12 hours	More than 10 years	Personal Computer/Laptop	Google	More than 6 times	Look for medication for specific disease;Look for symptoms and the possible diagnosis;Read about medications prescribed by your doctor	At a general search engine such as Google, Bing or Yahoo	Somewhat disagree	More than 5 links	Somewhat disagree	Completely disagree	Completely disagree	Somewhat disagree	Completely disagree	Completely disagree	Completely disagree	Completely disagree	Completely disagree	Completely disagree	Somewhat disagree	Somewhat disagree	Somewhat disagree	Completely disagree	Neither disagree nor agree	Somewhat disagree	Somewhat disagree	Completely disagree	Somewhat agree	Completely disagree	Completely disagree	Completely agree	Somewhat agree	Somewhat agree	Neither disagree nor agree	Somewhat agree	Completely agree	I donâ€™t mind if it has both 1 & 2		Female	41-60	United Kingdom	Postgraduate	Medical related
2017/02/09 1:32:28 PM GMT+1	More than 12 hours	More than 10 years	Personal Computer/Laptop;Smart phone	Google	More than 6 times	Look for symptoms and the possible diagnosis;Read more about disease diagnosed by your doctor;Read about medications prescribed by your doctor	At a general search engine such as Google, Bing or Yahoo	Somewhat agree	More than 5 links	Somewhat disagree	Completely agree	Somewhat agree	Completely agree	Completely disagree	Completely disagree	Neither disagree nor agree	Somewhat agree	Completely disagree	Somewhat agree	Completely agree	Completely agree	Completely agree	Somewhat agree	Completely agree	Neither disagree nor agree	Somewhat disagree	Somewhat agree	Somewhat agree	Somewhat agree	Completely disagree	Somewhat agree	Completely agree	Completely agree	Neither disagree nor agree	Completely agree	Completely agree	Medicine of which the effectiveness was demonstrated scientifically in clinical trials.		Female	18-25	United Kingdom	Graduate/higher diploma
2017/02/09 1:32:59 PM GMT+1	Less than 2 hours	More than 10 years	Tablet;Smart phone	Google	3-5 times	Look for symptoms and the possible diagnosis;Read more about disease diagnosed by your doctor	At a general search engine such as Google, Bing or Yahoo	Somewhat agree	More than 5 links	Neither disagree nor agree	Neither disagree nor agree	Somewhat agree	Neither disagree nor agree	Neither disagree nor agree	Somewhat agree	Somewhat agree	Somewhat agree	Neither disagree nor agree	Somewhat agree	Completely agree	Completely agree	Completely agree	Completely agree	Somewhat agree	Somewhat agree	Somewhat agree	Somewhat agree	Completely agree	Somewhat disagree	Somewhat disagree	Completely agree	Completely agree	Somewhat agree	Neither disagree nor agree	Somewhat agree	Completely agree	Medicine of which the effectiveness was demonstrated scientifically in clinical trials.		Female	41-60	United Kingdom	Graduate/higher diploma	Arts related
2017/02/09 1:33:07 PM GMT+1	7-12 hours	More than 10 years	Personal Computer/Laptop;Tablet;Smart phone	Google	3-5 times	Look for symptoms and the possible diagnosis	At a general search engine such as Google, Bing or Yahoo	Neither disagree nor agree	4-5 links	Somewhat disagree	Somewhat disagree	Somewhat disagree	Somewhat agree	Somewhat disagree	Somewhat disagree	Somewhat agree	Neither disagree nor agree	Somewhat disagree	Somewhat disagree	Completely disagree	Completely disagree	Somewhat agree	Somewhat disagree	Somewhat agree	Somewhat agree	Neither disagree nor agree	Neither disagree nor agree	Somewhat agree	Neither disagree nor agree	Completely agree	Somewhat agree	Somewhat agree	Somewhat agree	Neither disagree nor agree	Neither disagree nor agree	Somewhat agree	I donâ€™t mind if it has both 1 & 2		Male	41-60	United Kingdom	Postgraduate	Engineering/Math related
2017/02/09 1:33:39 PM GMT+1	More than 12 hours	More than 10 years	Personal Computer/Laptop	Google	More than 6 times	Look for medication for specific disease;Look for symptoms and the possible diagnosis;Read more about disease diagnosed by your doctor;Read about medications prescribed by your doctor	At a general search engine such as Google, Bing or Yahoo	Neither disagree nor agree	More than 5 links	Neither disagree nor agree	Somewhat agree	Neither disagree nor agree	Somewhat agree	Somewhat disagree	Completely disagree	Somewhat disagree	Neither disagree nor agree	Neither disagree nor agree	Neither disagree nor agree	Somewhat agree	Somewhat agree	Neither disagree nor agree	Neither disagree nor agree	Neither disagree nor agree	Somewhat agree	Somewhat disagree	Somewhat disagree	Neither disagree nor agree	Somewhat disagree	Completely disagree	Somewhat agree	Somewhat agree	Neither disagree nor agree	Neither disagree nor agree	Somewhat agree	Completely agree	I donâ€™t mind if it has both 1 & 2		Male	41-60	United Kingdom	Postgraduate	Business related
2017/02/09 1:33:46 PM GMT+1	7-12 hours	More than 10 years	Personal Computer/Laptop;Tablet	Google	More than 6 times	Look for symptoms and the possible diagnosis;Read more about disease diagnosed by your doctor;Read about medications prescribed by your doctor	At a site that specializes in health information, like NHS choices or WebMD (if you use a search engine to reach a specific site select this option)	Somewhat agree	2-3 links	Neither disagree nor agree	Completely agree	Somewhat agree	Somewhat agree	Neither disagree nor agree	Completely agree	Somewhat agree	Somewhat agree	Neither disagree nor agree	Somewhat agree	Completely agree	Completely agree	Somewhat agree	Completely agree	Completely agree	Completely agree	Somewhat agree	Somewhat agree	Somewhat agree	Somewhat disagree	Somewhat disagree	Completely agree	Completely agree	Completely agree	Completely agree	Somewhat agree	Completely agree	I donâ€™t mind if it has both 1 & 2		Male	41-60	United Kingdom	Graduate/higher diploma	Arts related
2017/02/09 1:33:52 PM GMT+1	More than 12 hours	More than 10 years	Personal Computer/Laptop;Tablet	Google	3-5 times	Look for symptoms and the possible diagnosis;Read more about disease diagnosed by your doctor;Read about medications prescribed by your doctor	At a general search engine such as Google, Bing or Yahoo	Completely disagree	4-5 links	Neither disagree nor agree	Somewhat agree	Somewhat agree	Somewhat agree	Neither disagree nor agree	Neither disagree nor agree	Somewhat agree	Neither disagree nor agree	Neither disagree nor agree	Completely agree	Completely agree	Completely agree	Completely agree	Somewhat agree	Neither disagree nor agree	Somewhat agree	Completely disagree	Somewhat disagree	Somewhat agree	Somewhat agree	Completely disagree	Completely agree	Completely agree	Somewhat agree	Somewhat agree	Completely agree	Completely agree	Medicine of which the effectiveness was demonstrated scientifically in clinical trials.		Female	26-40	United Kingdom	Graduate/higher diploma	Arts related
2017/02/09 1:34:12 PM GMT+1	7-12 hours	5-10 years	Personal Computer/Laptop	Google	1-2 times	Look for medication for specific disease;Look for symptoms and the possible diagnosis;Read more about disease diagnosed by your doctor;Read about medications prescribed by your doctor	At a general search engine such as Google, Bing or Yahoo	Somewhat agree	4-5 links	Somewhat agree	Completely agree	Completely agree	Completely agree	Completely agree	Completely agree	Completely agree	Completely agree	Completely agree	Completely agree	Completely agree	Completely agree	Completely agree	Completely agree	Completely agree	Completely agree	Somewhat disagree	Completely agree	Somewhat agree	Somewhat agree	Neither disagree nor agree	Completely agree	Completely agree	Completely agree	Completely agree	Completely agree	Completely agree	Medicine of which the effectiveness was demonstrated scientifically in clinical trials.		Male	41-60	United Kingdom	Graduate/higher diploma	Business related
2017/02/09 1:36:37 PM GMT+1	Less than 2 hours	5-10 years	Personal Computer/Laptop	Google	1-2 times	Look for symptoms and the possible diagnosis	At a general search engine such as Google, Bing or Yahoo	Somewhat agree	2-3 links	Neither disagree nor agree	Neither disagree nor agree	Neither disagree nor agree	Somewhat agree	Completely disagree	Neither disagree nor agree	Neither disagree nor agree	Neither disagree nor agree	Neither disagree nor agree	Neither disagree nor agree	Completely agree	Completely agree	Somewhat agree	Neither disagree nor agree	Completely agree	Somewhat agree	Somewhat agree	Completely agree	Completely agree	Neither disagree nor agree	Completely disagree	Completely agree	Completely agree	Somewhat agree	Neither disagree nor agree	Completely agree	Completely agree	Only alternative medicine (any of a range of medical therapies that are not regarded by medical professionals)		Female	41-60	United Kingdom	Postgraduate	Business related
2017/02/09 1:38:08 PM GMT+1	More than 12 hours	More than 10 years	Personal Computer/Laptop	Google	More than 6 times	Looking for information on Ayurvedic Treatments and Herbs	At a general search engine such as Google, Bing or Yahoo	Somewhat agree	More than 5 links	Somewhat agree	Somewhat disagree	Somewhat agree	Somewhat agree	Completely disagree	Neither disagree nor agree	Somewhat agree	Neither disagree nor agree	Completely disagree	Neither disagree nor agree	Neither disagree nor agree	Neither disagree nor agree	Completely agree	Neither disagree nor agree	Somewhat agree	Somewhat disagree	Completely disagree	Neither disagree nor agree	Completely disagree	Completely disagree	Completely disagree	Neither disagree nor agree	Neither disagree nor agree	Somewhat agree	Somewhat agree	Somewhat agree	Completely agree	I donâ€™t mind if it has both 1 & 2		Male	Prefer not to say	United Kingdom	Postgraduate	Arts related
2017/02/09 1:40:50 PM GMT+1	2-6 hours	More than 10 years	Personal Computer/Laptop;Smart phone	Google	1-2 times	Look for symptoms and the possible diagnosis	At a general search engine such as Google, Bing or Yahoo	Somewhat disagree	More than 5 links	Completely agree	Completely agree	Completely agree	Completely agree	Neither disagree nor agree	Completely agree	Completely agree	Completely agree	Somewhat agree	Completely agree	Completely agree	Completely agree	Completely agree	Completely agree	Completely agree	Somewhat agree	Somewhat disagree	Somewhat agree	Completely agree	Somewhat agree	Somewhat disagree	Completely agree	Completely agree	Completely agree	Somewhat agree	Completely agree	Completely agree	I donâ€™t mind if it has both 1 & 2		Male	41-60	United Kingdom	Postgraduate	Computing
2017/02/09 1:41:19 PM GMT+1	Less than 2 hours	More than 10 years	Personal Computer/Laptop;Smart phone	Google	3-5 times	Look for symptoms and the possible diagnosis;Read about medications prescribed by your doctor	At a general search engine such as Google, Bing or Yahoo	Somewhat agree	2-3 links	Completely disagree	Somewhat agree	Completely disagree	Somewhat agree	Completely disagree	Completely disagree	Somewhat agree	Completely agree	Completely disagree	Completely agree	Completely agree	Completely agree	Completely agree	Somewhat disagree	Somewhat agree	Somewhat disagree	Completely disagree	Completely disagree	Completely agree	Somewhat agree	Somewhat disagree	Completely disagree	Somewhat agree	Somewhat agree	Somewhat agree	Somewhat agree	Completely agree	Medicine of which the effectiveness was demonstrated scientifically in clinical trials.		Female	26-40	United Kingdom	Postgraduate	Arts related
2017/02/09 1:41:39 PM GMT+1	Less than 2 hours	More than 10 years	Personal Computer/Laptop;Smart phone	Google	3-5 times	further information about a health condition rather than disease	At a site that specializes in health information, like NHS choices or WebMD (if you use a search engine to reach a specific site select this option)	Somewhat disagree	4-5 links	Neither disagree nor agree	Neither disagree nor agree	Somewhat agree	Somewhat agree	Neither disagree nor agree	Neither disagree nor agree	Neither disagree nor agree	Neither disagree nor agree	Neither disagree nor agree	Neither disagree nor agree	Completely agree	Completely agree	Neither disagree nor agree	Completely agree	Completely agree	Somewhat disagree	Neither disagree nor agree	Somewhat disagree	Completely agree	Somewhat disagree	Completely disagree	Completely agree	Completely agree	Completely agree	Neither disagree nor agree	Completely agree	Completely agree	I donâ€™t mind if it has both 1 & 2	I would use the term medical condition rather than disease.	Female	41-60	United Kingdom	Graduate/higher diploma	Humanities
2017/02/09 1:43:52 PM GMT+1	7-12 hours	More than 10 years	Personal Computer/Laptop;Smart phone	Google	More than 6 times	Look for symptoms and the possible diagnosis;Read more about disease diagnosed by your doctor;Read about medications prescribed by your doctor	At a site that specializes in health information, like NHS choices or WebMD (if you use a search engine to reach a specific site select this option)	Somewhat disagree	2-3 links	Somewhat agree	Somewhat agree	Neither disagree nor agree	Somewhat agree	Neither disagree nor agree	Neither disagree nor agree	Neither disagree nor agree	Somewhat agree	Somewhat disagree	Completely agree	Completely agree	Completely agree	Completely agree	Neither disagree nor agree	Neither disagree nor agree	Somewhat agree	Somewhat disagree	Somewhat disagree	Somewhat disagree	Somewhat disagree	Somewhat disagree	Completely agree	Somewhat agree	Neither disagree nor agree	Somewhat disagree	Neither disagree nor agree	Completely agree	Medicine of which the effectiveness was demonstrated scientifically in clinical trials.		Female	26-40	United Kingdom	Graduate/higher diploma	Business related
2017/02/09 1:47:50 PM GMT+1	More than 12 hours	More than 10 years	Personal Computer/Laptop	Google	1-2 times	Look for medication for specific disease;Look for symptoms and the possible diagnosis;Read about medications prescribed by your doctor	At a general search engine such as Google, Bing or Yahoo	Neither disagree nor agree	More than 5 links	Neither disagree nor agree	Somewhat agree	Somewhat agree	Somewhat agree	Somewhat agree	Somewhat disagree	Somewhat disagree	Neither disagree nor agree	Completely disagree	Completely disagree	Somewhat agree	Somewhat agree	Somewhat agree	Somewhat agree	Neither disagree nor agree	Somewhat agree	Somewhat disagree	Neither disagree nor agree	Neither disagree nor agree	Neither disagree nor agree	Completely disagree	Somewhat agree	Somewhat agree	Completely agree	Somewhat agree	Completely agree	Completely agree	I donâ€™t mind if it has both 1 & 2		Female	26-40	United Kingdom	Postgraduate	Arts related
2017/02/09 1:48:36 PM GMT+1	Less than 2 hours	More than 10 years	Personal Computer/Laptop	Google	More than 6 times	Look for symptoms and the possible diagnosis;Read more about disease diagnosed by your doctor	At a site that specializes in health information, like NHS choices or WebMD (if you use a search engine to reach a specific site select this option)	Somewhat agree	2-3 links	Somewhat disagree	Somewhat agree	Somewhat agree	Completely agree	Completely disagree	Neither disagree nor agree	Somewhat agree	Neither disagree nor agree	Neither disagree nor agree	Somewhat agree	Completely agree	Completely agree	Completely agree	Somewhat disagree	Completely agree	Somewhat agree	Somewhat disagree	Somewhat disagree	Somewhat agree	Somewhat disagree	Somewhat disagree	Completely agree	Completely agree	Neither disagree nor agree	Neither disagree nor agree	Somewhat agree	Completely agree	I donâ€™t mind if it has both 1 & 2		Female	41-60	United Kingdom	Postgraduate	law
2017/02/09 1:50:26 PM GMT+1	2-6 hours	More than 10 years	Personal Computer/Laptop;Smart phone;Smart TV	Google	More than 6 times	Look for symptoms and the possible diagnosis;Read more about disease diagnosed by your doctor;Read about medications prescribed by your doctor;For me and my family	At a site that specializes in health information, like NHS choices or WebMD (if you use a search engine to reach a specific site select this option)	Somewhat disagree	2-3 links	Somewhat agree	Completely agree	Completely agree	Completely agree	Completely disagree	Completely disagree	Somewhat agree	Somewhat agree	Somewhat disagree	Completely agree	Completely agree	Completely agree	Completely agree	Somewhat agree	Neither disagree nor agree	Somewhat agree	Somewhat disagree	Somewhat disagree	Somewhat agree	Somewhat agree	Somewhat disagree	Completely agree	Completely agree	Somewhat agree	Somewhat agree	Somewhat agree	Completely agree	I donâ€™t mind if it has both 1 & 2		Female	26-40	United Kingdom	Graduate/higher diploma	Arts related
2017/02/09 1:50:35 PM GMT+1	7-12 hours	More than 10 years	Personal Computer/Laptop;Tablet;Smart phone	Google	3-5 times	Look for symptoms and the possible diagnosis;Read more about disease diagnosed by your doctor;Read about medications prescribed by your doctor	At a general search engine such as Google, Bing or Yahoo	Somewhat agree	More than 5 links	Neither disagree nor agree	Somewhat agree	Somewhat agree	Somewhat agree	Neither disagree nor agree	Neither disagree nor agree	Somewhat agree	Neither disagree nor agree	Neither disagree nor agree	Somewhat agree	Somewhat agree	Somewhat agree	Somewhat agree	Neither disagree nor agree	Completely agree	Somewhat agree	Somewhat agree	Completely agree	Somewhat agree	Somewhat disagree	Somewhat disagree	Somewhat agree	Somewhat agree	Somewhat agree	Neither disagree nor agree	Somewhat agree	Somewhat agree	I donâ€™t mind if it has both 1 & 2		Female	26-40	United Kingdom	Postgraduate	Science and Social Science
2017/02/09 1:55:37 PM GMT+1	Less than 2 hours	5-10 years	Personal Computer/Laptop;Tablet	Google	1-2 times	Look for symptoms and the possible diagnosis	At a general search engine such as Google, Bing or Yahoo	Somewhat agree	2-3 links	Somewhat agree	Somewhat agree	Somewhat agree	Completely agree	Neither disagree nor agree	Neither disagree nor agree	Somewhat agree	Neither disagree nor agree	Neither disagree nor agree	Somewhat disagree	Somewhat agree	Somewhat agree	Completely agree	Completely agree	Neither disagree nor agree	Somewhat agree	Somewhat agree	Somewhat agree	Completely agree	Somewhat agree	Somewhat agree	Completely agree	Somewhat agree	Somewhat agree	Somewhat agree	Somewhat agree	Completely agree	I donâ€™t mind if it has both 1 & 2		Female	41-60	United Kingdom
2017/02/09 1:57:01 PM GMT+1	Less than 2 hours	5-10 years	Personal Computer/Laptop;Smart phone	Google;some private weblogs	More than 6 times	Look for medication for specific disease;Look for symptoms and the possible diagnosis;Read more about disease diagnosed by your doctor	At a general search engine such as Google, Bing or Yahoo	Somewhat agree	4-5 links	Somewhat agree	Completely agree	Somewhat agree	Somewhat agree	Somewhat agree	Somewhat agree	Somewhat agree	Somewhat agree	Neither disagree nor agree	Somewhat agree	Somewhat agree	Somewhat agree	Somewhat agree	Somewhat agree	Somewhat agree	Somewhat agree	Somewhat agree	Neither disagree nor agree	Neither disagree nor agree	Somewhat agree	Somewhat agree	Somewhat agree	Somewhat agree	Somewhat agree	Somewhat agree	Somewhat agree	Neither disagree nor agree	I donâ€™t mind if it has both 1 & 2		Male	26-40	Afghanistan	Postgraduate	Engineering/Math related
2017/02/09 1:57:32 PM GMT+1	Less than 2 hours	More than 10 years	Personal Computer/Laptop;Smart phone	Google;Firefox	1-2 times	Look for symptoms and the possible diagnosis	At a general search engine such as Google, Bing or Yahoo	Completely agree	2-3 links	Completely agree	Completely agree	Completely agree	Completely agree	Completely agree	Completely agree	Completely agree	Completely agree	Completely agree	Completely agree	Completely agree	Completely agree	Completely agree	Completely agree	Somewhat agree	Completely agree	Somewhat disagree	Somewhat disagree	Somewhat agree	Completely disagree	Completely disagree	Completely agree	Completely agree	Completely agree	Somewhat disagree	Completely agree	Completely agree	Medicine of which the effectiveness was demonstrated scientifically in clinical trials.		Female	41-60	United Kingdom	Postgraduate	Medical related
2017/02/09 1:59:26 PM GMT+1	7-12 hours	More than 10 years	Personal Computer/Laptop;Tablet;Smart phone	Google	More than 6 times	Look for medication for specific disease;Look for symptoms and the possible diagnosis;Read more about disease diagnosed by your doctor;Read about medications prescribed by your doctor	At a site that specializes in health information, like NHS choices or WebMD (if you use a search engine to reach a specific site select this option)	Somewhat agree	More than 5 links	Neither disagree nor agree	Somewhat agree	Somewhat agree	Completely agree	Neither disagree nor agree	Neither disagree nor agree	Completely agree	Completely agree	Somewhat agree	Somewhat agree	Completely agree	Somewhat agree	Somewhat agree	Somewhat agree	Completely agree	Completely agree	Neither disagree nor agree	Somewhat agree	Completely agree	Somewhat agree	Somewhat disagree	Neither disagree nor agree	Somewhat agree	Completely agree	Completely agree	Completely agree	Completely agree	I donâ€™t mind if it has both 1 & 2		Female	41-60	United Kingdom	Graduate/higher diploma	Information
2017/02/09 2:00:18 PM GMT+1	More than 12 hours	More than 10 years	Personal Computer/Laptop;Tablet	Google	3-5 times	Look for medication for specific disease;Look for symptoms and the possible diagnosis;Read more about disease diagnosed by your doctor;Read about medications prescribed by your doctor	At a general search engine such as Google, Bing or Yahoo	Neither disagree nor agree	More than 5 links	Somewhat disagree	Neither disagree nor agree	Somewhat agree	Somewhat agree	Somewhat disagree	Somewhat agree	Somewhat agree	Neither disagree nor agree	Neither disagree nor agree	Somewhat agree	Somewhat agree	Somewhat agree	Somewhat agree	Neither disagree nor agree	Somewhat agree	Neither disagree nor agree	Neither disagree nor agree	Somewhat agree	Completely disagree	Completely agree	Neither disagree nor agree	Completely agree	Completely agree	Somewhat agree	Completely agree	Completely agree	Completely agree	I donâ€™t mind if it has both 1 & 2		Male	41-60	United Kingdom	Graduate/higher diploma	Arts related
2017/02/09 2:00:55 PM GMT+1	More than 12 hours	More than 10 years	Personal Computer/Laptop;Tablet;Smart phone	Google	3-5 times	Look for medication for specific disease;Look for symptoms and the possible diagnosis;Read about medications prescribed by your doctor	At a site that specializes in health information, like NHS choices or WebMD (if you use a search engine to reach a specific site select this option)	Somewhat agree	2-3 links	Completely agree	Completely agree	Completely agree	Completely agree	Completely agree	Somewhat agree	Somewhat agree	Somewhat agree	Neither disagree nor agree	Somewhat agree	Completely agree	Completely agree	Completely agree	Completely agree	Somewhat agree	Neither disagree nor agree	Neither disagree nor agree	Neither disagree nor agree	Somewhat agree	Somewhat agree	Somewhat agree	Completely agree	Somewhat agree	Somewhat agree	Somewhat agree	Somewhat agree	Completely agree	I donâ€™t mind if it has both 1 & 2		Female	26-40	United Kingdom	Postgraduate	Medical related
2017/02/09 2:02:36 PM GMT+1	Less than 2 hours	More than 10 years	Personal Computer/Laptop	Google	3-5 times	Look for symptoms and the possible diagnosis;Read more about disease diagnosed by your doctor	At a site that specializes in health information, like NHS choices or WebMD (if you use a search engine to reach a specific site select this option)	Somewhat agree	2-3 links	Neither disagree nor agree	Somewhat agree	Completely agree	Somewhat agree	Neither disagree nor agree	Somewhat agree	Completely agree	Completely agree	Completely agree	Completely disagree	Completely agree	Completely agree	Completely agree	Completely agree	Completely agree	Completely agree	Neither disagree nor agree	Neither disagree nor agree	Completely agree	Completely disagree	Completely disagree	Completely agree	Somewhat agree	Neither disagree nor agree	Neither disagree nor agree	Somewhat agree	Completely agree	Medicine of which the effectiveness was demonstrated scientifically in clinical trials.		Female	41-60		Graduate/higher diploma	Arts related
2017/02/09 2:09:10 PM GMT+1	7-12 hours	More than 10 years	Personal Computer/Laptop;Tablet;Smart phone	Google	3-5 times	Look for medication for specific disease;Look for symptoms and the possible diagnosis;Read more about disease diagnosed by your doctor	At a general search engine such as Google, Bing or Yahoo	Somewhat disagree	4-5 links	Neither disagree nor agree	Somewhat agree	Somewhat agree	Completely agree	Neither disagree nor agree	Neither disagree nor agree	Somewhat agree	Neither disagree nor agree	Completely disagree	Completely disagree	Somewhat agree	Somewhat agree	Completely agree	Somewhat agree	Completely agree	Somewhat agree	Somewhat agree	Neither disagree nor agree	Somewhat disagree	Somewhat agree	Somewhat disagree	Somewhat agree	Somewhat agree	Somewhat agree	Somewhat agree	Somewhat agree	Completely agree	I donâ€™t mind if it has both 1 & 2		Female	26-40	United Kingdom	Postgraduate	Medical related
2017/02/09 2:10:51 PM GMT+1	7-12 hours	More than 10 years	Personal Computer/Laptop;Tablet;Smart phone	Google;Bing	More than 6 times	Look for symptoms and the possible diagnosis;Read about medications prescribed by your doctor	At a general search engine such as Google, Bing or Yahoo	Somewhat agree	2-3 links	Somewhat agree	Somewhat agree	Somewhat agree	Completely agree	Neither disagree nor agree	Somewhat agree	Somewhat agree	Somewhat agree	Neither disagree nor agree	Somewhat disagree	Completely agree	Completely agree	Completely agree	Somewhat agree	Somewhat agree	Somewhat agree	Neither disagree nor agree	Neither disagree nor agree	Completely agree	Somewhat disagree	Somewhat disagree	Somewhat agree	Somewhat agree	Somewhat agree	Somewhat agree	Somewhat agree	Completely agree	I donâ€™t mind if it has both 1 & 2		Female	26-40	United Kingdom	Graduate/higher diploma	Medical related
2017/02/09 2:12:34 PM GMT+1	Less than 2 hours	More than 10 years	Personal Computer/Laptop	Google	More than 6 times	Look for symptoms and the possible diagnosis;Read more about disease diagnosed by your doctor;Read about medications prescribed by your doctor	At a general search engine such as Google, Bing or Yahoo	Somewhat disagree	2-3 links	Neither disagree nor agree	Somewhat agree	Somewhat disagree	Somewhat agree	Somewhat agree	Completely agree	Completely agree	Completely agree	Somewhat agree	Completely agree	Completely agree	Completely agree	Completely agree	Somewhat agree	Somewhat agree	Somewhat disagree	Neither disagree nor agree	Somewhat disagree	Somewhat agree	Somewhat disagree	Completely disagree	Completely agree	Completely agree	Completely agree	Completely agree	Completely agree	Completely agree	Medicine of which the effectiveness was demonstrated scientifically in clinical trials.	The country the webpage is from.	Female	41-60	United Kingdom	Postgraduate	Arts related
2017/02/09 2:13:53 PM GMT+1	7-12 hours	More than 10 years	Personal Computer/Laptop;Tablet;Smart phone	Google	More than 6 times	Look for medication for specific disease;Look for symptoms and the possible diagnosis	At a general search engine such as Google, Bing or Yahoo	Somewhat agree	4-5 links	Somewhat agree	Somewhat agree	Somewhat agree	Completely agree	Neither disagree nor agree	Somewhat agree	Somewhat disagree	Neither disagree nor agree	Somewhat disagree	Somewhat agree	Completely agree	Completely agree	Completely agree	Completely agree	Completely agree	Completely agree	Completely agree	Completely agree	Somewhat agree	Somewhat agree	Somewhat disagree	Completely agree	Somewhat agree	Somewhat agree	Somewhat agree	Somewhat agree	Completely agree	I donâ€™t mind if it has both 1 & 2		Female	41-60	United Kingdom	Postgraduate	Medical related
2017/02/09 2:14:39 PM GMT+1	More than 12 hours	More than 10 years	Personal Computer/Laptop;Tablet;Smart phone	Google	More than 6 times	Look for symptoms and the possible diagnosis	At a general search engine such as Google, Bing or Yahoo	Somewhat disagree	More than 5 links	Completely agree	Completely agree	Completely agree	Completely agree	Neither disagree nor agree	Neither disagree nor agree	Completely agree	Somewhat agree	Neither disagree nor agree	Somewhat agree	Completely agree	Completely agree	Completely agree	Somewhat agree	Completely agree	Somewhat agree	Somewhat agree	Completely agree	Completely agree	Somewhat disagree	Completely disagree	Completely agree	Completely agree	Somewhat agree	Neither disagree nor agree	Neither disagree nor agree	Somewhat agree	I donâ€™t mind if it has both 1 & 2		Female	26-40	United Kingdom	Postgraduate	Medical related
2017/02/09 2:17:59 PM GMT+1	More than 12 hours	More than 10 years	Personal Computer/Laptop;Tablet	Google;Bing	3-5 times	Look for symptoms and the possible diagnosis;Read more about disease diagnosed by your doctor	At a general search engine such as Google, Bing or Yahoo	Somewhat agree	2-3 links	Somewhat agree	Somewhat agree	Completely agree	Neither disagree nor agree	Neither disagree nor agree	Neither disagree nor agree	Neither disagree nor agree	Neither disagree nor agree	Neither disagree nor agree	Completely agree	Completely agree	Completely agree	Completely agree	Somewhat agree	Somewhat agree	Completely agree	Neither disagree nor agree	Somewhat agree	Completely agree	Somewhat disagree	Completely disagree	Completely agree	Completely agree	Somewhat agree	Neither disagree nor agree	Neither disagree nor agree	Completely agree	I donâ€™t know	I generally only read NHS or similar reliable web sources for health info and ignore the more 'independent' websites.	Female	41-60	United Kingdom	High school
2017/02/09 2:18:22 PM GMT+1	More than 12 hours	More than 10 years	Personal Computer/Laptop;Tablet;Smart phone	Google	3-5 times	Look for medication for specific disease;Look for symptoms and the possible diagnosis;Read about medications prescribed by your doctor	At a general search engine such as Google, Bing or Yahoo	Neither disagree nor agree	2-3 links	Neither disagree nor agree	Neither disagree nor agree	Neither disagree nor agree	Somewhat agree	Neither disagree nor agree	Neither disagree nor agree	Neither disagree nor agree	Neither disagree nor agree	Somewhat agree	Neither disagree nor agree	Completely agree	Completely agree	Completely agree	Somewhat agree	Completely agree	Somewhat agree	Neither disagree nor agree	Somewhat agree	Somewhat agree	Somewhat disagree	Somewhat agree	Completely agree	Somewhat agree	Somewhat agree	Somewhat agree	Completely agree	Somewhat agree	I donâ€™t mind if it has both 1 & 2		Female	41-60	United Kingdom	Postgraduate	Arts related
2017/02/09 2:42:53 PM GMT+1	Less than 2 hours	5-10 years	Personal Computer/Laptop;Tablet;Smart phone	Google	3-5 times	Look for symptoms and the possible diagnosis	At a general search engine such as Google, Bing or Yahoo	Neither disagree nor agree	4-5 links	Neither disagree nor agree	Neither disagree nor agree	Neither disagree nor agree	Neither disagree nor agree	Neither disagree nor agree	Neither disagree nor agree	Neither disagree nor agree	Neither disagree nor agree	Neither disagree nor agree	Neither disagree nor agree	Neither disagree nor agree	Neither disagree nor agree	Somewhat agree	Neither disagree nor agree	Completely agree	Somewhat agree	Neither disagree nor agree	Somewhat agree	Somewhat disagree	Somewhat agree	Neither disagree nor agree	Completely agree	Somewhat agree	Somewhat agree	Neither disagree nor agree	Neither disagree nor agree	Neither disagree nor agree	I donâ€™t mind if it has both 1 & 2		Female	41-60	United Kingdom	High school
2017/02/09 2:44:17 PM GMT+1	More than 12 hours	5-10 years	Personal Computer/Laptop;Smart phone	Google	3-5 times	Look for medication for specific disease;Look for symptoms and the possible diagnosis;Read more about disease diagnosed by your doctor;Read about medications prescribed by your doctor	At a site that specializes in health information, like NHS choices or WebMD (if you use a search engine to reach a specific site select this option)	Somewhat agree	2-3 links	Somewhat agree	Somewhat agree	Somewhat agree	Somewhat agree	Somewhat disagree	Neither disagree nor agree	Somewhat agree	Neither disagree nor agree	Neither disagree nor agree	Somewhat agree	Completely agree	Completely agree	Completely agree	Neither disagree nor agree	Somewhat agree	Somewhat agree	Somewhat agree	Somewhat agree	Somewhat agree	Somewhat disagree	Somewhat disagree	Completely agree	Completely agree	Completely agree	Somewhat agree	Completely agree	Completely agree	I donâ€™t mind if it has both 1 & 2		Female	26-40	United Kingdom	Postgraduate	Medical related
2017/02/09 2:45:05 PM GMT+1	2-6 hours	5-10 years	Smart phone	Google	3-5 times	Look for symptoms and the possible diagnosis;Read more about disease diagnosed by your doctor;Read about medications prescribed by your doctor	At a general search engine such as Google, Bing or Yahoo	Somewhat agree	4-5 links	Somewhat agree	Somewhat agree	Neither disagree nor agree	Completely agree	Neither disagree nor agree	Somewhat agree	Completely agree	Neither disagree nor agree	Somewhat disagree	Completely disagree	Completely agree	Completely agree	Completely agree	Somewhat agree	Completely agree	Somewhat agree	Somewhat agree	Somewhat disagree	Somewhat agree	Somewhat agree	Somewhat disagree	Completely agree	Somewhat agree	Somewhat agree	Somewhat disagree	Somewhat agree	Completely agree	Medicine of which the effectiveness was demonstrated scientifically in clinical trials.		Female	26-40	United Kingdom	Graduate/higher diploma	Science
2017/02/09 2:54:21 PM GMT+1	2-6 hours	More than 10 years	Personal Computer/Laptop;Tablet;Smart phone;Work PC	Google	More than 6 times	Look for symptoms and the possible diagnosis;Read more about disease diagnosed by your doctor;Read about medications prescribed by your doctor	At a general search engine such as Google, Bing or Yahoo	Somewhat agree	2-3 links	Completely agree	Completely agree	Completely agree	Completely agree	Neither disagree nor agree	Somewhat disagree	Completely agree	Somewhat agree	Somewhat agree	Completely agree	Completely agree	Completely agree	Completely agree	Somewhat agree	Somewhat agree	Somewhat agree	Somewhat disagree	Somewhat agree	Completely agree	Somewhat disagree	Completely disagree	Completely agree	Completely agree	Completely agree	Somewhat disagree	Neither disagree nor agree	Completely agree	Medicine of which the effectiveness was demonstrated scientifically in clinical trials.		Female	>60	United Kingdom	Postgraduate
2017/02/09 2:54:46 PM GMT+1	More than 12 hours	More than 10 years	Personal Computer/Laptop;Tablet;Smart phone	Google	More than 6 times	Look for symptoms and the possible diagnosis;Read more about disease diagnosed by your doctor;Read about medications prescribed by your doctor;To research a medical procedure	At a general search engine such as Google, Bing or Yahoo	Somewhat agree	2-3 links	Somewhat agree	Somewhat agree	Somewhat agree	Somewhat agree	Neither disagree nor agree	Completely agree	Somewhat agree	Somewhat agree	Somewhat agree	Somewhat agree	Completely agree	Completely agree	Somewhat agree	Neither disagree nor agree	Somewhat agree	Somewhat agree	Somewhat disagree	Neither disagree nor agree	Somewhat agree	Somewhat agree	Somewhat disagree	Somewhat agree	Somewhat agree	Somewhat agree	Somewhat agree	Somewhat agree	Somewhat agree	Medicine of which the effectiveness was demonstrated scientifically in clinical trials.		Female	>60	United Kingdom	Graduate/higher diploma	Arts related
2017/02/09 3:29:32 PM GMT+1	2-6 hours	More than 10 years	Personal Computer/Laptop;Smart phone	Google	More than 6 times	Look for medication for specific disease;Look for symptoms and the possible diagnosis;Read more about disease diagnosed by your doctor;Read about medications prescribed by your doctor	At a site that specializes in health information, like NHS choices or WebMD (if you use a search engine to reach a specific site select this option)	Somewhat agree	2-3 links	Somewhat agree	Completely agree	Somewhat agree	Somewhat agree	Neither disagree nor agree	Neither disagree nor agree	Somewhat agree	Completely agree	Neither disagree nor agree	Somewhat agree	Completely agree	Completely agree	Completely agree	Somewhat agree	Neither disagree nor agree	Somewhat agree	Neither disagree nor agree	Neither disagree nor agree	Completely agree	Somewhat agree	Somewhat disagree	Somewhat agree	Completely agree	Completely agree	Completely agree	Somewhat agree	Completely agree	I donâ€™t mind if it has both 1 & 2		Female	26-40	United Kingdom	Graduate/higher diploma	Humanities
2017/02/09 3:31:11 PM GMT+1	More than 12 hours	More than 10 years	Personal Computer/Laptop;Smart phone	Google	More than 6 times	Look for medication for specific disease;Look for symptoms and the possible diagnosis	At a general search engine such as Google, Bing or Yahoo	Somewhat disagree	4-5 links	Neither disagree nor agree	Somewhat agree	Somewhat agree	Somewhat agree	Neither disagree nor agree	Completely agree	Neither disagree nor agree	Neither disagree nor agree	Somewhat agree	Completely agree	Somewhat agree	Somewhat agree	Somewhat agree	Somewhat agree	Somewhat agree	Completely agree	Somewhat agree	Somewhat agree	Neither disagree nor agree	Somewhat agree	Somewhat agree	Somewhat agree	Somewhat agree	Somewhat agree	Somewhat agree	Completely agree	Completely agree	I donâ€™t mind if it has both 1 & 2		Male	26-40	United Kingdom	Postgraduate	Engineering/Math related
2017/02/09 3:33:13 PM GMT+1	More than 12 hours	More than 10 years	Personal Computer/Laptop;Tablet;Smart phone;Smart TV	Google	3-5 times	Look for symptoms and the possible diagnosis;Read more about disease diagnosed by your doctor;Read about medications prescribed by your doctor	At a site that specializes in health information, like NHS choices or WebMD (if you use a search engine to reach a specific site select this option)	Neither disagree nor agree	2-3 links	Neither disagree nor agree	Somewhat agree	Somewhat agree	Somewhat agree	Somewhat disagree	Completely agree	Somewhat agree	Neither disagree nor agree	Neither disagree nor agree	Completely agree	Somewhat agree	Somewhat agree	Completely agree	Neither disagree nor agree	Completely agree	Somewhat disagree	Somewhat disagree	Neither disagree nor agree	Somewhat agree	Somewhat disagree	Completely disagree	Completely agree	Completely agree	Somewhat agree	Neither disagree nor agree	Somewhat agree	Completely agree	Medicine of which the effectiveness was demonstrated scientifically in clinical trials.		Male	26-40	United Kingdom	Postgraduate	Arts related
2017/02/09 3:34:42 PM GMT+1	2-6 hours	More than 10 years	Personal Computer/Laptop;Tablet;Smart phone	Google;Yahoo!	More than 6 times	Look for symptoms and the possible diagnosis;Lots of (paranoid) questions about pregnancy & babies...	At a site that specializes in health information, like NHS choices or WebMD (if you use a search engine to reach a specific site select this option)	Somewhat agree	2-3 links	Completely agree	Completely agree	Somewhat agree	Completely agree	Neither disagree nor agree	Completely agree	Somewhat agree	Somewhat agree	Neither disagree nor agree	Somewhat agree	Completely agree	Completely agree	Completely agree	Somewhat agree	Somewhat agree	Completely agree	Somewhat disagree	Somewhat disagree	Completely agree	Completely disagree	Completely disagree	Completely agree	Somewhat agree	Somewhat agree	Neither disagree nor agree	Completely agree	Completely agree	I donâ€™t mind if it has both 1 & 2		Female	41-60	United Kingdom	Postgraduate	Engineering/Math related
2017/02/09 3:43:01 PM GMT+1	2-6 hours	More than 10 years	Personal Computer/Laptop;Tablet;Smart phone	Google	More than 6 times	Look for symptoms and the possible diagnosis;Read more about disease diagnosed by your doctor;Read about medications prescribed by your doctor	At a general search engine such as Google, Bing or Yahoo	Neither disagree nor agree	4-5 links	Neither disagree nor agree	Neither disagree nor agree	Somewhat agree	Somewhat agree	Somewhat agree	Neither disagree nor agree	Neither disagree nor agree	Somewhat agree	Neither disagree nor agree	Somewhat agree	Completely agree	Completely agree	Somewhat agree	Neither disagree nor agree	Completely agree	Completely agree	Somewhat disagree	Somewhat agree	Neither disagree nor agree	Somewhat agree	Somewhat disagree	Completely agree	Somewhat agree	Somewhat agree	Somewhat agree	Somewhat agree	Somewhat agree	I donâ€™t mind if it has both 1 & 2		Female	41-60	United Kingdom	Postgraduate	Arts related
2017/02/09 3:43:38 PM GMT+1	Less than 2 hours	More than 10 years	Personal Computer/Laptop;Tablet;Smart phone	Google;Safari	3-5 times	Look for medication for specific disease;Look for symptoms and the possible diagnosis;Read more about disease diagnosed by your doctor;Read about medications prescribed by your doctor	At a general search engine such as Google, Bing or Yahoo	Somewhat agree	4-5 links	Neither disagree nor agree	Somewhat agree	Somewhat agree	Completely agree	Neither disagree nor agree	Somewhat agree	Completely agree	Neither disagree nor agree	Completely agree	Completely disagree	Completely agree	Somewhat agree	Completely agree	Somewhat agree	Somewhat agree	Somewhat agree	Completely disagree	Somewhat disagree	Somewhat agree	Somewhat disagree	Completely disagree	Completely agree	Completely agree	Completely agree	Somewhat agree	Completely agree	Completely agree	Medicine of which the effectiveness was demonstrated scientifically in clinical trials.		Male	>60	United Kingdom	Postgraduate	Business related
2017/02/09 3:50:50 PM GMT+1	More than 12 hours	More than 10 years	Personal Computer/Laptop;Smart phone	Google	3-5 times	Look for medication for specific disease;Read more about disease diagnosed by your doctor;Read about medications prescribed by your doctor	At a general search engine such as Google, Bing or Yahoo	Somewhat agree	4-5 links	Somewhat agree	Somewhat agree	Completely agree	Completely agree	Neither disagree nor agree	Neither disagree nor agree	Somewhat agree	Somewhat agree	Somewhat agree	Neither disagree nor agree	Somewhat agree	Somewhat agree	Completely agree	Somewhat agree	Somewhat agree	Somewhat agree	Somewhat disagree	Somewhat agree	Neither disagree nor agree	Neither disagree nor agree	Neither disagree nor agree	Neither disagree nor agree	Somewhat agree	Somewhat agree	Somewhat agree	Somewhat agree	Somewhat disagree	Medicine of which the effectiveness was demonstrated scientifically in clinical trials.		Female	26-40	United Kingdom	Postgraduate	Medical related
2017/02/09 4:15:44 PM GMT+1	2-6 hours	More than 10 years	Personal Computer/Laptop;Tablet	Google	More than 6 times	Look for symptoms and the possible diagnosis;Read more about disease diagnosed by your doctor;Read about medications prescribed by your doctor	At a general search engine such as Google, Bing or Yahoo	Neither disagree nor agree	2-3 links	Somewhat agree	Completely agree	Completely agree	Completely agree	Somewhat disagree	Somewhat agree	Completely agree	Completely agree	Completely agree	Completely agree	Completely agree	Completely agree	Completely agree	Neither disagree nor agree	Completely agree	Completely agree	Somewhat agree	Somewhat agree	Somewhat disagree	Somewhat agree	Neither disagree nor agree	Completely agree	Completely agree	Somewhat agree	Somewhat agree	Completely agree	Completely agree	Medicine of which the effectiveness was demonstrated scientifically in clinical trials.		Female	41-60	United Kingdom	Postgraduate	Social Sciences
2017/02/09 4:36:32 PM GMT+1	2-6 hours	5-10 years	Personal Computer/Laptop;Smart phone	Google	3-5 times	Look for medication for specific disease;Look for symptoms and the possible diagnosis	At a general search engine such as Google, Bing or Yahoo	Somewhat agree	4-5 links	Somewhat agree	Somewhat agree	Neither disagree nor agree	Completely agree	Neither disagree nor agree	Neither disagree nor agree	Neither disagree nor agree	Neither disagree nor agree	Neither disagree nor agree	Completely agree	Completely agree	Completely agree	Completely agree	Neither disagree nor agree	Completely agree	Completely agree	Somewhat agree	Somewhat agree	Somewhat agree	Somewhat agree	Somewhat disagree	Completely agree	Completely agree	Completely agree	Somewhat agree	Completely agree	Completely agree	I donâ€™t mind if it has both 1 & 2		Female	41-60	United Kingdom	Graduate/higher diploma	Arts related
2017/02/09 4:39:47 PM GMT+1	7-12 hours	More than 10 years	Personal Computer/Laptop;Tablet;Smart phone	Google	3-5 times	Look for symptoms and the possible diagnosis	At a site that specializes in health information, like NHS choices or WebMD (if you use a search engine to reach a specific site select this option)	Somewhat agree	4-5 links	Somewhat agree	Completely agree	Completely agree	Somewhat agree	Neither disagree nor agree	Neither disagree nor agree	Somewhat agree	Somewhat agree	Neither disagree nor agree	Somewhat agree	Completely agree	Completely agree	Completely agree	Somewhat agree	Somewhat agree	Somewhat agree	Somewhat agree	Somewhat agree	Neither disagree nor agree	Somewhat agree	Completely agree	Somewhat agree	Completely agree	Completely agree	Somewhat agree	Completely agree	Completely agree	I donâ€™t mind if it has both 1 & 2		Female	26-40	United Kingdom	Postgraduate	Medical related
2017/02/09 5:13:26 PM GMT+1	Less than 2 hours	More than 10 years	Personal Computer/Laptop;Tablet;Smart phone	Google	More than 6 times	Look for symptoms and the possible diagnosis;Read about medications prescribed by your doctor	At a general search engine such as Google, Bing or Yahoo	Somewhat agree	4-5 links	Somewhat agree	Somewhat agree	Neither disagree nor agree	Somewhat agree	Neither disagree nor agree	Somewhat disagree	Neither disagree nor agree	Neither disagree nor agree	Somewhat disagree	Somewhat disagree	Somewhat agree	Somewhat agree	Somewhat agree	Somewhat agree	Completely agree	Completely agree	Somewhat agree	Completely agree	Completely agree	Somewhat agree	Neither disagree nor agree	Completely agree	Somewhat agree	Somewhat agree	Somewhat agree	Completely agree	Completely agree	Medicine of which the effectiveness was demonstrated scientifically in clinical trials.		Male	>60	United Kingdom	High school
2017/02/09 5:58:40 PM GMT+1	Less than 2 hours	More than 10 years	Personal Computer/Laptop;Tablet;Smart phone;work computer	Google	More than 6 times	clinical management (I am a doctor)	clinical knowledge summary (CKS) - outstanding	Somewhat disagree	2-3 links	Neither disagree nor agree	Somewhat agree	Somewhat agree	Completely agree	Somewhat disagree	Somewhat agree	Somewhat agree	Neither disagree nor agree	Neither disagree nor agree	Completely agree	Completely agree	Completely agree	Somewhat agree	Somewhat agree	Somewhat agree	Completely agree	Completely agree	Somewhat agree	Somewhat agree	Somewhat agree	Somewhat agree	Completely agree	Somewhat agree	Somewhat agree	Somewhat agree	Somewhat agree	Completely agree	I donâ€™t mind if it has both 1 & 2		Male	41-60	United Kingdom	Postgraduate	Medical related
2017/02/09 6:52:59 PM GMT+1	2-6 hours	More than 10 years	Personal Computer/Laptop;Tablet;Smart phone	Google	3-5 times	Look for symptoms and the possible diagnosis;Read more about disease diagnosed by your doctor;look for natural health alternative to medical issues	At a site that specializes in health information, like NHS choices or WebMD (if you use a search engine to reach a specific site select this option)	Somewhat agree	4-5 links	Neither disagree nor agree	Somewhat agree	Neither disagree nor agree	Somewhat agree	Neither disagree nor agree	Neither disagree nor agree	Neither disagree nor agree	Neither disagree nor agree	Neither disagree nor agree	Somewhat agree	Somewhat agree	Somewhat agree	Somewhat agree	Completely agree	Neither disagree nor agree	Somewhat agree	Neither disagree nor agree	Neither disagree nor agree	Neither disagree nor agree	Somewhat agree	Somewhat disagree	Completely agree	Somewhat agree	Somewhat agree	Neither disagree nor agree	Somewhat agree	Completely agree	I donâ€™t mind if it has both 1 & 2		Female	26-40	United Kingdom	Postgraduate	Enivronmental science
2017/02/09 9:29:51 PM GMT+1	More than 12 hours	More than 10 years	Personal Computer/Laptop;Tablet;Smart phone	Google	More than 6 times	Look for medication for specific disease;Look for symptoms and the possible diagnosis;Read more about disease diagnosed by your doctor	At a site that specializes in health information, like NHS choices or WebMD (if you use a search engine to reach a specific site select this option)	Somewhat agree	More than 5 links	Neither disagree nor agree	Somewhat agree	Somewhat agree	Completely agree	Neither disagree nor agree	Neither disagree nor agree	Somewhat agree	Neither disagree nor agree	Completely disagree	Somewhat agree	Completely agree	Completely agree	Somewhat agree	Somewhat agree	Completely agree	Somewhat disagree	Somewhat disagree	Somewhat agree	Somewhat agree	Somewhat disagree	Completely disagree	Somewhat disagree	Somewhat agree	Completely agree	Somewhat agree	Somewhat agree	Completely agree	Medicine of which the effectiveness was demonstrated scientifically in clinical trials.		Female	26-40	United Kingdom	Postgraduate	Librarianship/ information
2017/02/09 11:01:19 PM GMT+1	2-6 hours	More than 10 years	Personal Computer/Laptop;Smart phone	Google	3-5 times	Read about medications prescribed by your doctor	At a general search engine such as Google, Bing or Yahoo	Somewhat agree	More than 5 links	Completely agree	Completely agree	Completely agree	Completely agree	Somewhat agree	Completely agree	Somewhat agree	Completely agree	Neither disagree nor agree	Completely agree	Completely agree	Completely agree	Completely agree	Completely agree	Completely agree	Somewhat agree	Completely agree	Completely agree	Completely agree	Neither disagree nor agree	Somewhat agree	Neither disagree nor agree	Completely agree	Somewhat agree	Completely agree	Completely agree	Completely agree	I donâ€™t know		Male	26-40	Yemen	Postgraduate	Engineering/Math related
2017/02/10 12:04:16 AM GMT+1	More than 12 hours	More than 10 years	Personal Computer/Laptop;Tablet;Smart phone	Google	More than 6 times	Look for medication for specific disease;Look for symptoms and the possible diagnosis	At a general search engine such as Google, Bing or Yahoo	Somewhat agree	More than 5 links	Completely agree	Neither disagree nor agree	Somewhat disagree	Completely agree	Completely agree	Somewhat agree	Somewhat agree	Neither disagree nor agree	Neither disagree nor agree	Somewhat agree	Completely agree	Completely agree	Completely agree	Somewhat agree	Neither disagree nor agree	Somewhat agree	Neither disagree nor agree	Neither disagree nor agree	Neither disagree nor agree	Completely disagree	Somewhat disagree	Completely agree	Somewhat agree	Completely agree	Neither disagree nor agree	Somewhat agree	Completely agree	I donâ€™t mind if it has both 1 & 2	It is very important to get the information from a reliable source that has a reputation and valid information such as NHS website. There are plenty other valid sites available but I prefer to use the local webpages that come with .uk domain as I prefer to have some personal and local news about my results. however the problem with website such as NHS is that they are very generic and abstract in…	Male	26-40	United Kingdom	Postgraduate	computing
2017/02/10 12:58:51 AM GMT+1	Less than 2 hours	5-10 years	Personal Computer/Laptop	Google	More than 6 times	Look for symptoms and the possible diagnosis;Read more about disease diagnosed by your doctor;Read about medications prescribed by your doctor	At a general search engine such as Google, Bing or Yahoo	Somewhat disagree	More than 5 links	Neither disagree nor agree	Somewhat agree	Somewhat agree	Somewhat agree	Somewhat agree	Somewhat agree	Somewhat agree	Somewhat agree	Neither disagree nor agree	Neither disagree nor agree	Neither disagree nor agree	Neither disagree nor agree	Neither disagree nor agree	Somewhat agree	Neither disagree nor agree	Somewhat agree	Neither disagree nor agree	Somewhat agree	Somewhat agree	Somewhat agree	Somewhat agree	Somewhat disagree	Somewhat agree	Somewhat agree	Somewhat agree	Somewhat agree	Somewhat agree	Medicine of which the effectiveness was demonstrated scientifically in clinical trials.		Male	26-40	New Zealand	Postgraduate	Engineering/Math related
2017/02/10 9:42:05 AM GMT+1	Less than 2 hours	5-10 years	Personal Computer/Laptop;Tablet	Google	3-5 times	Look for symptoms and the possible diagnosis;Read more about disease diagnosed by your doctor	At a general search engine such as Google, Bing or Yahoo	Neither disagree nor agree	4-5 links	Somewhat agree	Somewhat agree	Neither disagree nor agree	Somewhat agree	Neither disagree nor agree	Neither disagree nor agree	Neither disagree nor agree	Neither disagree nor agree	Neither disagree nor agree	Neither disagree nor agree	Somewhat agree	Somewhat agree	Somewhat agree	Somewhat agree	Somewhat agree	Somewhat agree	Completely disagree	Somewhat disagree	Completely agree	Somewhat agree	Somewhat disagree	Neither disagree nor agree	Completely agree	Somewhat agree	Neither disagree nor agree	Completely agree	Completely agree	I donâ€™t mind if it has both 1 & 2		Female	41-60	United Kingdom	Postgraduate
2017/02/10 10:01:43 AM GMT+1	More than 12 hours	More than 10 years	Personal Computer/Laptop;Smart phone	Google	More than 6 times	Look for symptoms and the possible diagnosis;Read more about disease diagnosed by your doctor;Read about medications prescribed by your doctor	At a site that specializes in health information, like NHS choices or WebMD (if you use a search engine to reach a specific site select this option)	Completely disagree	More than 5 links	Somewhat agree	Somewhat agree	Completely agree	Completely agree	Neither disagree nor agree	Neither disagree nor agree	Completely agree	Completely agree	Neither disagree nor agree	Completely agree	Completely agree	Completely agree	Completely agree	Completely agree	Completely agree	Somewhat disagree	Completely disagree	Somewhat agree	Somewhat agree	Somewhat disagree	Completely disagree	Completely agree	Somewhat agree	Neither disagree nor agree	Neither disagree nor agree	Somewhat agree	Completely agree	I donâ€™t know		Female	41-60	United Kingdom	Postgraduate	Business related
2017/02/10 10:11:00 AM GMT+1	2-6 hours	5-10 years	Personal Computer/Laptop;Tablet;Smart phone	Google;Firefox, Explorer	More than 6 times	Look for symptoms and the possible diagnosis;Read more about disease diagnosed by your doctor	At a general search engine such as Google, Bing or Yahoo	Somewhat agree	2-3 links	Neither disagree nor agree	Somewhat agree	Somewhat agree	Somewhat agree	Neither disagree nor agree	Somewhat agree	Somewhat agree	Neither disagree nor agree	Neither disagree nor agree	Somewhat agree	Completely agree	Completely agree	Completely agree	Somewhat agree	Completely agree	Somewhat agree	Neither disagree nor agree	Somewhat agree	Somewhat agree	Somewhat agree	Neither disagree nor agree	Completely agree	Somewhat agree	Somewhat agree	Somewhat agree	Somewhat agree	Completely agree	I donâ€™t mind if it has both 1 & 2		Female	41-60	United Kingdom	High school	Administration
2017/02/10 10:32:17 AM GMT+1	More than 12 hours	More than 10 years	Personal Computer/Laptop;Tablet;Smart phone	Google	More than 6 times	Look for symptoms and the possible diagnosis;Read about medications prescribed by your doctor	At a general search engine such as Google, Bing or Yahoo	Somewhat agree	2-3 links	Neither disagree nor agree	Neither disagree nor agree	Neither disagree nor agree	Somewhat agree	Neither disagree nor agree	Neither disagree nor agree	Somewhat agree	Neither disagree nor agree	Neither disagree nor agree	Neither disagree nor agree	Somewhat agree	Somewhat agree	Somewhat agree	Neither disagree nor agree	Somewhat agree	Somewhat agree	Somewhat disagree	Neither disagree nor agree	Somewhat disagree	Somewhat disagree	Somewhat disagree	Completely agree	Completely agree	Completely agree	Completely agree	Completely agree	Completely agree	I donâ€™t mind if it has both 1 & 2		Female	26-40	United Kingdom	Graduate/higher diploma	Arts related
2017/02/10 11:47:56 AM GMT+1	7-12 hours	More than 10 years	Personal Computer/Laptop;Smart phone	Google	3-5 times	Look for symptoms and the possible diagnosis	At a general search engine such as Google, Bing or Yahoo	Somewhat agree	2-3 links	Neither disagree nor agree	Neither disagree nor agree	Neither disagree nor agree	Neither disagree nor agree	Completely disagree	Completely disagree	Completely disagree	Neither disagree nor agree	Neither disagree nor agree	Somewhat agree	Completely agree	Completely agree	Completely agree	Neither disagree nor agree	Somewhat agree	Neither disagree nor agree	Neither disagree nor agree	Neither disagree nor agree	Somewhat disagree	Neither disagree nor agree	Somewhat disagree	Completely agree	Completely agree	Neither disagree nor agree	Somewhat disagree	Somewhat agree	Completely agree	I donâ€™t know		Female	41-60	United Kingdom	Postgraduate	Arts related
2017/02/10 11:55:18 AM GMT+1	7-12 hours	More than 10 years	Personal Computer/Laptop;Smart phone	Google	More than 6 times	Look for medication for specific disease;Look for symptoms and the possible diagnosis;Read more about disease diagnosed by your doctor;Read about medications prescribed by your doctor	At a site that specializes in health information, like NHS choices or WebMD (if you use a search engine to reach a specific site select this option)	Somewhat agree	2-3 links	Somewhat agree	Completely agree	Somewhat agree	Completely agree	Neither disagree nor agree	Completely agree	Neither disagree nor agree	Somewhat agree	Somewhat agree	Neither disagree nor agree	Completely agree	Completely agree	Completely agree	Neither disagree nor agree	Somewhat agree	Somewhat agree	Somewhat disagree	Neither disagree nor agree	Somewhat disagree	Somewhat disagree	Completely disagree	Somewhat agree	Completely agree	Completely agree	Somewhat agree	Completely agree	Completely agree	I donâ€™t mind if it has both 1 & 2		Male	41-60	United Kingdom	Graduate/higher diploma
2017/02/10 12:03:42 PM GMT+1	2-6 hours	More than 10 years	Personal Computer/Laptop;Smart phone	Google	More than 6 times	Look for symptoms and the possible diagnosis;Read more about disease diagnosed by your doctor;Read about medications prescribed by your doctor	At a general search engine such as Google, Bing or Yahoo	Somewhat agree	4-5 links	Completely agree	Completely agree	Completely agree	Completely agree	Somewhat disagree	Neither disagree nor agree	Completely agree	Neither disagree nor agree	Neither disagree nor agree	Somewhat agree	Completely agree	Completely agree	Completely agree	Completely agree	Completely agree	Somewhat agree	Somewhat disagree	Somewhat disagree	Completely agree	Somewhat disagree	Completely disagree	Completely agree	Completely agree	Completely agree	Completely agree	Completely agree	Completely agree	Medicine of which the effectiveness was demonstrated scientifically in clinical trials.	Some of these questions are so leading that your results will not be valid - you can probably just go ahead and write your conclusions before you get the responses. You may find people are awkward when they feel they are being led, and give strange answers. I have tried to be as honest as I can.	Female	41-60	United Kingdom	Postgraduate	Medical related
2017/02/10 4:12:06 PM GMT+1	Less than 2 hours	More than 10 years	Personal Computer/Laptop;Tablet	Google;one search - UoB library search	3-5 times	Read more about disease diagnosed by your doctor;Read about medications prescribed by your doctor;for information/updates prior to teaching	At a site that specializes in health information, like NHS choices or WebMD (if you use a search engine to reach a specific site select this option)	Completely disagree	2-3 links	Completely disagree	Somewhat disagree	Somewhat agree	Somewhat agree	Somewhat disagree	Somewhat agree	Somewhat agree	Somewhat agree	Somewhat agree	Somewhat agree	Completely agree	Completely agree	Somewhat agree	Somewhat agree	Somewhat agree	Completely agree	Neither disagree nor agree	Completely disagree	Somewhat agree	Completely disagree	Completely disagree	Completely agree	Somewhat agree	Somewhat agree	Somewhat agree	Somewhat agree	Completely agree	Medicine of which the effectiveness was demonstrated scientifically in clinical trials.		Female	41-60	United Kingdom	Postgraduate	Medical related
2017/02/10 4:21:04 PM GMT+1	2-6 hours	More than 10 years	Personal Computer/Laptop;Tablet;Smart phone	Google	More than 6 times	Look for symptoms and the possible diagnosis;Read more about disease diagnosed by your doctor;Read about medications prescribed by your doctor	At a general search engine such as Google, Bing or Yahoo	Somewhat disagree	More than 5 links	Somewhat agree	Somewhat agree	Completely agree	Completely agree	Neither disagree nor agree	Somewhat disagree	Somewhat agree	Neither disagree nor agree	Neither disagree nor agree	Neither disagree nor agree	Completely agree	Completely agree	Completely agree	Somewhat agree	Completely agree	Somewhat agree	Somewhat disagree	Somewhat disagree	Somewhat agree	Somewhat agree	Somewhat disagree	Somewhat agree	Completely agree	Completely agree	Completely agree	Completely agree	Completely agree	Medicine of which the effectiveness was demonstrated scientifically in clinical trials.		Female	41-60	United Kingdom	Postgraduate
2017/02/10 6:11:03 PM GMT+1	Less than 2 hours	5-10 years	Personal Computer/Laptop	Google	More than 6 times	Look for symptoms and the possible diagnosis	At a general search engine such as Google, Bing or Yahoo	Neither disagree nor agree	2-3 links	Somewhat agree	Somewhat agree	Somewhat agree	Completely agree	Neither disagree nor agree	Neither disagree nor agree	Somewhat agree	Neither disagree nor agree	Neither disagree nor agree	Somewhat agree	Completely agree	Completely agree	Completely agree	Neither disagree nor agree	Completely agree	Somewhat agree	Completely agree	Completely agree	Completely disagree	Completely disagree	Completely disagree	Completely disagree	Somewhat agree	Somewhat agree	Somewhat agree	Somewhat agree	Completely agree	Medicine of which the effectiveness was demonstrated scientifically in clinical trials.		Female	41-60	United Kingdom	Postgraduate	Business related
2017/02/10 6:53:33 PM GMT+1	More than 12 hours	5-10 years	Tablet;Smart phone	Google	More than 6 times	Look for medication for specific disease;Look for symptoms and the possible diagnosis;Read more about disease diagnosed by your doctor;Read about medications prescribed by your doctor;Teaching	At a general search engine such as Google, Bing or Yahoo	Somewhat agree	4-5 links	Somewhat agree	Somewhat agree	Completely agree	Completely agree	Somewhat agree	Somewhat agree	Completely agree	Completely agree	Somewhat agree	Somewhat agree	Completely agree	Completely agree	Somewhat agree	Completely agree	Completely agree	Completely agree	Somewhat agree	Somewhat agree	Completely agree	Somewhat agree	Somewhat disagree	Completely agree	Somewhat agree	Completely agree	Somewhat agree	Completely agree	Completely agree	I donâ€™t mind if it has both 1 & 2		Female	41-60	United Kingdom	Postgraduate	Medical related
2017/02/10 7:45:00 PM GMT+1	2-6 hours	5-10 years	Personal Computer/Laptop;Tablet	Google;dogpile	1-2 times	Look for symptoms and the possible diagnosis;Look for natural remedies	At a general search engine such as Google, Bing or Yahoo	Somewhat disagree	More than 5 links	Somewhat agree	Neither disagree nor agree	Completely disagree	Completely agree	Completely disagree	Completely disagree	Completely disagree	Completely disagree	Neither disagree nor agree	Neither disagree nor agree	Neither disagree nor agree	Neither disagree nor agree	Neither disagree nor agree	Completely agree	Neither disagree nor agree	Neither disagree nor agree	Completely disagree	Neither disagree nor agree	Neither disagree nor agree	Neither disagree nor agree	Neither disagree nor agree	Neither disagree nor agree	Somewhat agree	Somewhat agree	Somewhat disagree	Somewhat agree	Completely disagree	I donâ€™t mind if it has both 1 & 2	Health is maintained through nutrition self medication and knowledge	Prefer not to say	41-60	United Kingdom	Postgraduate	Environment
2017/02/10 11:09:17 PM GMT+1	2-6 hours	3-5 years	Personal Computer/Laptop;Smart phone	Google	More than 6 times	Look for medication for specific disease;Look for symptoms and the possible diagnosis	At a general search engine such as Google, Bing or Yahoo	Neither disagree nor agree	2-3 links	Somewhat agree	Somewhat agree	Somewhat agree	Completely agree	Completely agree	Completely agree	Completely agree	Somewhat agree	Completely agree	Somewhat agree	Neither disagree nor agree	Neither disagree nor agree	Completely agree	Completely agree	Somewhat agree	Neither disagree nor agree	Somewhat agree	Completely agree	Neither disagree nor agree	Somewhat agree	Somewhat agree	Completely agree	Completely agree	Completely agree	Completely agree	Completely agree	Completely agree	Only alternative medicine (any of a range of medical therapies that are not regarded by medical professionals)	Ù„Ø§ ÙŠÙˆØ¬Ø¯	Male	41-60	Yemen	High school	Engineering/Math related
2017/02/11 10:23:15 PM GMT+1	More than 12 hours	More than 10 years	Personal Computer/Laptop;Tablet;Smart phone	Google	More than 6 times	Look for medication for specific disease;Look for symptoms and the possible diagnosis;Read more about disease diagnosed by your doctor;Read about medications prescribed by your doctor	At a general search engine such as Google, Bing or Yahoo	Neither disagree nor agree	4-5 links	Completely disagree	Completely disagree	Completely disagree	Somewhat agree	Completely disagree	Neither disagree nor agree	Somewhat agree	Somewhat agree	Neither disagree nor agree	Neither disagree nor agree	Completely agree	Completely agree	Completely agree	Completely disagree	Completely agree	Completely agree	Completely agree	Completely agree	Completely agree	Somewhat agree	Completely disagree	Neither disagree nor agree	Completely agree	Completely agree	Completely agree	Completely agree	Completely agree	I donâ€™t mind if it has both 1 & 2		Female	41-60	United Kingdom	Postgraduate
2017/02/12 5:29:07 PM GMT+1	2-6 hours	More than 10 years	Personal Computer/Laptop	Google;Bing	3-5 times	Look for symptoms and the possible diagnosis	At a general search engine such as Google, Bing or Yahoo	Somewhat disagree	2-3 links	Somewhat disagree	Somewhat disagree	Somewhat agree	Somewhat agree	Somewhat disagree	Somewhat disagree	Completely disagree	Somewhat agree	Neither disagree nor agree	Neither disagree nor agree	Completely agree	Completely agree	Completely agree	Somewhat agree	Somewhat agree	Somewhat agree	Neither disagree nor agree	Somewhat agree	Completely disagree	Somewhat agree	Completely disagree	Completely agree	Completely agree	Completely agree	Completely agree	Completely agree	Completely agree	I donâ€™t mind if it has both 1 & 2		Female	41-60	United Kingdom	Graduate/higher diploma	Education/Language
2017/02/13 10:48:06 AM GMT+1	2-6 hours	5-10 years	Smart phone	Google	3-5 times	Look for symptoms and the possible diagnosis;Read more about disease diagnosed by your doctor	At a general search engine such as Google, Bing or Yahoo	Somewhat agree	2-3 links	Completely agree	Completely agree	Completely agree	Completely agree	Somewhat disagree	Neither disagree nor agree	Somewhat agree	Somewhat agree	Completely agree	Completely agree	Completely agree	Completely agree	Completely agree	Somewhat agree	Completely agree	Completely agree	Completely disagree	Completely agree	Somewhat agree	Neither disagree nor agree	Completely disagree	Completely agree	Somewhat agree	Somewhat agree	Somewhat agree	Somewhat agree	Completely agree	I donâ€™t mind if it has both 1 & 2	Apps/sites that are recommended by a healthcare professional. Services that are a known pathway (pharmacy/NHS Direct)	Female	41-60	United Kingdom	Postgraduate	Business related
2017/02/13 11:06:14 AM GMT+1	7-12 hours	More than 10 years	Personal Computer/Laptop;Tablet;Smart phone	Google	More than 6 times	Look for symptoms and the possible diagnosis	At a general search engine such as Google, Bing or Yahoo	Somewhat disagree	2-3 links	Neither disagree nor agree	Somewhat agree	Neither disagree nor agree	Somewhat agree	Neither disagree nor agree	Somewhat agree	Somewhat agree	Somewhat agree	Somewhat agree	Completely agree	Completely agree	Completely agree	Completely agree	Completely agree	Neither disagree nor agree	Somewhat disagree	Somewhat disagree	Somewhat disagree	Completely agree	Somewhat disagree	Completely agree	Somewhat agree	Somewhat agree	Somewhat agree	Neither disagree nor agree	Somewhat agree	Completely agree	Medicine of which the effectiveness was demonstrated scientifically in clinical trials.	Websites which link to/are provided by official health providers (eg NHS) or physicians with genuine and demonstrable qualifications are the only ones I will take seriously	Male	41-60	United Kingdom	High school	Arts related
2017/02/13 4:20:13 PM GMT+1	More than 12 hours	More than 10 years	Personal Computer/Laptop;Smart phone	Google	3-5 times	Look for medication for specific disease;Look for symptoms and the possible diagnosis;Read more about disease diagnosed by your doctor;Read about medications prescribed by your doctor	At a site that specializes in health information, like NHS choices or WebMD (if you use a search engine to reach a specific site select this option)	Somewhat agree	More than 5 links	Completely agree	Completely agree	Completely agree	Completely agree	Somewhat agree	Somewhat agree	Somewhat agree	Completely agree	Completely agree	Completely agree	Somewhat agree	Somewhat agree	Completely agree	Completely agree	Somewhat agree	Somewhat agree	Somewhat agree	Somewhat agree	Completely agree	Somewhat agree	Completely disagree	Somewhat agree	Completely agree	Completely agree	Completely agree	Completely agree	Completely agree	I donâ€™t mind if it has both 1 & 2		Male	18-25	United States	Graduate/higher diploma	Engineering/Math related
2017/02/13 8:21:01 PM GMT+1	More than 12 hours	More than 10 years	Personal Computer/Laptop;Tablet;Smart phone	Google	More than 6 times	I am a health scientist. So I look for health information almost every day.	Not sure, but to get access to wikipedia, you need a webbrowswer. So you need Google or similar.	Somewhat agree	More than 5 links	Neither disagree nor agree	Neither disagree nor agree	Neither disagree nor agree	Somewhat agree	Neither disagree nor agree	Somewhat agree	Somewhat agree	Somewhat agree	Somewhat agree	Somewhat agree	Somewhat agree	Somewhat agree	Neither disagree nor agree	Somewhat agree	Neither disagree nor agree	Neither disagree nor agree	Neither disagree nor agree	Neither disagree nor agree	Somewhat agree	Somewhat agree	Completely disagree	Completely agree	Neither disagree nor agree	Neither disagree nor agree	Neither disagree nor agree	Somewhat agree	Neither disagree nor agree	I donâ€™t mind if it has both 1 & 2	I find it annoying if I have to answer. Can I ask you why you do not have to ask for consent to take part in your research?	Male	Prefer not to say	United Kingdom	Postgraduate	Medical related
2017/02/13 11:41:44 PM GMT+1	2-6 hours	3-5 years	Personal Computer/Laptop;Smart phone	Google	3-5 times	Look for medication for specific disease;Look for symptoms and the possible diagnosis	At a general search engine such as Google, Bing or Yahoo	Somewhat disagree	4-5 links	Somewhat disagree	Somewhat agree	Somewhat disagree	Somewhat agree	Somewhat agree	Completely disagree	Somewhat agree	Somewhat disagree	Somewhat disagree	Somewhat disagree	Somewhat disagree	Somewhat disagree	Somewhat disagree	Somewhat agree	Somewhat disagree	Completely agree	Completely agree	Completely agree	Somewhat agree	Somewhat agree	Somewhat disagree	Completely agree	Completely agree	Somewhat agree	Somewhat agree	Completely agree	Completely agree	I donâ€™t mind if it has both 1 & 2		Male	18-25	Canada	Graduate/higher diploma	Arts related
2017/02/14 12:20:25 AM GMT+1	7-12 hours	More than 10 years	Personal Computer/Laptop;Smart phone	Google	1-2 times	Look for medication for specific disease	At a general search engine such as Google, Bing or Yahoo	Somewhat disagree	2-3 links	Somewhat disagree	Somewhat agree	Somewhat agree	Completely agree	Somewhat agree	Somewhat agree	Somewhat agree	Somewhat agree	Somewhat agree	Somewhat disagree	Somewhat agree	Somewhat agree	Somewhat disagree	Somewhat agree	Somewhat agree	Somewhat agree	Completely disagree	Somewhat agree	Completely agree	Somewhat agree	Neither disagree nor agree	Neither disagree nor agree	Somewhat agree	Somewhat agree	Neither disagree nor agree	Completely agree	Completely agree	I donâ€™t know		Male	26-40	Canada	Postgraduate	Engineering/Math related
2017/02/14 12:30:34 AM GMT+1	7-12 hours	More than 10 years	Personal Computer/Laptop;Smart phone	Google	More than 6 times	Look for symptoms and the possible diagnosis;Read more about disease diagnosed by your doctor;Read about medications prescribed by your doctor	At a more general site like Wikipedia, that contains information on all kinds of topics (if you use a search engine to reach a specific site select this option)	Somewhat agree	4-5 links	Somewhat agree	Somewhat agree	Somewhat agree	Somewhat agree	Neither disagree nor agree	Neither disagree nor agree	Neither disagree nor agree	Neither disagree nor agree	Neither disagree nor agree	Completely agree	Completely agree	Completely agree	Completely agree	Neither disagree nor agree	Completely agree	Somewhat agree	Somewhat disagree	Somewhat disagree	Somewhat agree	Neither disagree nor agree	Neither disagree nor agree	Completely agree	Somewhat agree	Somewhat agree	Neither disagree nor agree	Completely agree	Completely agree	I donâ€™t mind if it has both 1 & 2		Male	26-40	Canada	Postgraduate	Medical related
2017/02/14 12:56:57 AM GMT+1	2-6 hours	More than 10 years	Personal Computer/Laptop;Smart phone	Google	More than 6 times	Look for medication for specific disease;Look for symptoms and the possible diagnosis	At a general search engine such as Google, Bing or Yahoo	Somewhat agree	More than 5 links	Neither disagree nor agree	Somewhat agree	Neither disagree nor agree	Completely agree	Neither disagree nor agree	Neither disagree nor agree	Neither disagree nor agree	Somewhat agree	Somewhat agree	Completely agree	Completely agree	Completely agree	Somewhat agree	Neither disagree nor agree	Completely agree	Neither disagree nor agree	Somewhat disagree	Neither disagree nor agree	Somewhat agree	Completely disagree	Neither disagree nor agree	Completely agree	Somewhat agree	Completely agree	Somewhat agree	Completely agree	Completely agree	I donâ€™t mind if it has both 1 & 2	Websites that allows comments so I can read other people's complaints or experiences	Female	18-25	Canada	High school	Arts related
2017/02/14 3:48:42 AM GMT+1	7-12 hours	More than 10 years	Personal Computer/Laptop;Smart phone	Google	3-5 times	Look for medication for specific disease;Look for symptoms and the possible diagnosis;Read about medications prescribed by your doctor	At a general search engine such as Google, Bing or Yahoo	Somewhat agree	More than 5 links	Neither disagree nor agree	Somewhat agree	Somewhat agree	Somewhat agree	Completely agree	Somewhat agree	Somewhat agree	Completely agree	Neither disagree nor agree	Neither disagree nor agree	Neither disagree nor agree	Neither disagree nor agree	Somewhat agree	Completely agree	Somewhat agree	Somewhat agree	Somewhat disagree	Somewhat agree	Somewhat agree	Somewhat disagree	Neither disagree nor agree	Completely agree	Completely agree	Completely agree	Completely agree	Completely agree	Somewhat agree	I donâ€™t mind if it has both 1 & 2		Male	26-40	Saudi Arabia	High school	Engineering/Math related
2017/02/14 6:17:21 AM GMT+1	2-6 hours	5-10 years	Personal Computer/Laptop;Smart phone	Google;Yahoo!	1-2 times	Look for medication for specific disease;Read more about disease diagnosed by your doctor;Read about medications prescribed by your doctor	At a site that specializes in health information, like NHS choices or WebMD (if you use a search engine to reach a specific site select this option)	Neither disagree nor agree	2-3 links	Neither disagree nor agree	Neither disagree nor agree	Neither disagree nor agree	Neither disagree nor agree	Neither disagree nor agree	Neither disagree nor agree	Neither disagree nor agree	Neither disagree nor agree	Neither disagree nor agree	Neither disagree nor agree	Neither disagree nor agree	Neither disagree nor agree	Neither disagree nor agree	Neither disagree nor agree	Neither disagree nor agree	Neither disagree nor agree	Neither disagree nor agree	Neither disagree nor agree	Neither disagree nor agree	Neither disagree nor agree	Neither disagree nor agree	Neither disagree nor agree	Neither disagree nor agree	Neither disagree nor agree	Neither disagree nor agree	Neither disagree nor agree	Neither disagree nor agree	Only alternative medicine (any of a range of medical therapies that are not regarded by medical professionals)		Male	26-40	Yemen	Graduate/higher diploma	Medical related
2017/02/14 6:22:37 AM GMT+1	2-6 hours	3-5 years	Personal Computer/Laptop;Smart phone	Google	I have never sought health information online	I never seek health information online	I never sought health information online	Completely disagree	2-3 links	Completely disagree	Somewhat disagree	Somewhat disagree	Somewhat agree	Somewhat disagree	Somewhat disagree	Somewhat disagree	Somewhat disagree	Somewhat disagree	Somewhat disagree	Somewhat disagree	Somewhat disagree	Somewhat disagree	Somewhat disagree	Somewhat agree	Somewhat agree	Neither disagree nor agree	Somewhat agree	Somewhat agree	Neither disagree nor agree	Neither disagree nor agree	Neither disagree nor agree	Neither disagree nor agree	Neither disagree nor agree	Neither disagree nor agree	Neither disagree nor agree	Neither disagree nor agree	I donâ€™t know		Male	18-25	Canada	Postgraduate	Engineering/Math related
2017/02/14 7:14:08 AM GMT+1	7-12 hours	5-10 years	Tablet;Smart phone	Google	1-2 times	Look for medication for specific disease;Read about medications prescribed by your doctor	At a general search engine such as Google, Bing or Yahoo	Somewhat agree	More than 5 links	Somewhat agree	Somewhat agree	Neither disagree nor agree	Somewhat disagree	Somewhat agree	Completely agree	Neither disagree nor agree	Completely agree	Somewhat agree	Completely agree	Completely agree	Completely agree	Neither disagree nor agree	Somewhat agree	Somewhat agree	Neither disagree nor agree	Somewhat agree	Completely agree	Somewhat agree	Somewhat agree	Neither disagree nor agree	Completely agree	Completely agree	Completely agree	Somewhat disagree	Somewhat agree	Completely agree	Medicine of which the effectiveness was demonstrated scientifically in clinical trials.		Female	18-25	Canada	Graduate/higher diploma	Engineering/Math related
2017/02/14 10:13:39 AM GMT+1	2-6 hours	More than 10 years	Personal Computer/Laptop;Tablet;Smart phone	Google	More than 6 times	Look for medication for specific disease;Look for symptoms and the possible diagnosis;Read more about disease diagnosed by your doctor;Read about medications prescribed by your doctor	At a general search engine such as Google, Bing or Yahoo	Neither disagree nor agree	4-5 links	Neither disagree nor agree	Completely agree	Somewhat agree	Somewhat agree	Somewhat agree	Somewhat disagree	Somewhat agree	Somewhat agree	Somewhat disagree	Completely disagree	Somewhat agree	Somewhat agree	Somewhat agree	Somewhat agree	Completely disagree	Somewhat disagree	Somewhat disagree	Somewhat agree	Completely disagree	Somewhat agree	Somewhat disagree	Somewhat disagree	Somewhat agree	Somewhat disagree	Neither disagree nor agree	Neither disagree nor agree	Completely agree	Medicine of which the effectiveness was demonstrated scientifically in clinical trials.		Female	26-40	Italy	Postgraduate	Medical related
2017/02/14 11:33:10 AM GMT+1	More than 12 hours	5-10 years	Smart phone	Google	3-5 times	Look for medication for specific disease;Read more about disease diagnosed by your doctor	At a general search engine such as Google, Bing or Yahoo	Somewhat agree	2-3 links	Somewhat agree	Neither disagree nor agree	Somewhat agree	Neither disagree nor agree	Somewhat agree	Somewhat agree	Somewhat agree	Somewhat agree	Somewhat agree	Somewhat agree	Somewhat agree	Somewhat agree	Somewhat agree	Completely agree	Somewhat agree	Somewhat agree	Completely agree	Completely agree	Completely agree	Somewhat agree	Completely agree	Somewhat agree	Somewhat agree	Somewhat agree	Somewhat agree	Somewhat agree	Somewhat agree	I donâ€™t know		Male	18-25	Saudi Arabia	Postgraduate	Engineering/Math related
2017/02/14 11:33:39 AM GMT+1	More than 12 hours	More than 10 years	Personal Computer/Laptop;Smart phone;Smart TV	Google	More than 6 times	Look for medication for specific disease;Look for symptoms and the possible diagnosis;Read more about disease diagnosed by your doctor;Read about medications prescribed by your doctor	At a site that specializes in health information, like NHS choices or WebMD (if you use a search engine to reach a specific site select this option)	Somewhat agree	More than 5 links	Somewhat agree	Completely agree	Completely agree	Completely agree	Completely agree	Completely agree	Somewhat agree	Somewhat agree	Somewhat agree	Somewhat agree	Completely agree	Completely agree	Completely agree	Somewhat agree	Completely agree	Completely agree	Completely agree	Somewhat agree	Somewhat agree	Somewhat agree	Completely agree	Somewhat agree	Completely agree	Completely agree	Completely agree	Completely agree	Completely agree	I donâ€™t mind if it has both 1 & 2	Age, gender ,race ,location ,level of education .....etc	Male	26-40	Saudi Arabia	Postgraduate	Medical related
2017/02/14 11:48:16 AM GMT+1	2-6 hours	More than 10 years	Personal Computer/Laptop;Smart phone	Google	More than 6 times	Look for medication for specific disease;Look for symptoms and the possible diagnosis;Read about medications prescribed by your doctor	At a social network site like Facebook	Neither disagree nor agree	More than 5 links	Somewhat agree	Neither disagree nor agree	Somewhat agree	Somewhat disagree	Somewhat disagree	Somewhat disagree	Neither disagree nor agree	Somewhat agree	Completely disagree	Somewhat disagree	Neither disagree nor agree	Neither disagree nor agree	Somewhat agree	Somewhat agree	Somewhat agree	Completely agree	Somewhat agree	Somewhat agree	Somewhat agree	Somewhat disagree	Somewhat agree	Neither disagree nor agree	Completely agree	Somewhat agree	Somewhat disagree	Somewhat disagree	Somewhat disagree	Medicine of which the effectiveness was demonstrated scientifically in clinical trials.	Usually I prefer to take an information that come from accredited agency for example for drugs if it's approved by FDA then I checked drugs in FDA website and drugs company as well GOOOOOOD LUCK YA Habib	Male	26-40	Yemen	Graduate/higher diploma	Quality managemetnt
2017/02/14 12:08:32 PM GMT+1	More than 12 hours	More than 10 years	Personal Computer/Laptop;Smart phone	Google	More than 6 times	Look for symptoms and the possible diagnosis;Read more about disease diagnosed by your doctor	At a general search engine such as Google, Bing or Yahoo	Somewhat disagree	4-5 links	Somewhat agree	Neither disagree nor agree	Somewhat disagree	Somewhat agree	Completely disagree	Completely disagree	Somewhat disagree	Neither disagree nor agree	Neither disagree nor agree	Somewhat agree	Neither disagree nor agree	Neither disagree nor agree	Somewhat agree	Completely agree	Completely agree	Somewhat agree	Somewhat agree	Somewhat agree	Somewhat agree	Somewhat agree	Neither disagree nor agree	Neither disagree nor agree	Neither disagree nor agree	Neither disagree nor agree	Somewhat disagree	Neither disagree nor agree	Completely agree	Only alternative medicine (any of a range of medical therapies that are not regarded by medical professionals)		Male	26-40	Malaysia	Postgraduate	Engineering/Math related
2017/02/14 1:15:38 PM GMT+1	2-6 hours	5-10 years	Personal Computer/Laptop;Smart phone	Google	More than 6 times	Look for medication for specific disease;Look for symptoms and the possible diagnosis;Read more about disease diagnosed by your doctor	At a general search engine such as Google, Bing or Yahoo	Somewhat agree	More than 5 links	Somewhat agree	Somewhat agree	Completely agree	Somewhat agree	Neither disagree nor agree	Completely agree	Somewhat agree	Neither disagree nor agree	Completely agree	Completely agree	Completely agree	Somewhat agree	Completely agree	Somewhat agree	Completely agree	Completely agree	Somewhat disagree	Somewhat agree	Neither disagree nor agree	Neither disagree nor agree	Somewhat agree	Completely disagree	Completely agree	Completely agree	Completely agree	Completely agree	Completely agree	Medicine of which the effectiveness was demonstrated scientifically in clinical trials.		Male	26-40	Sudan	Postgraduate	Medical related
2017/02/14 1:35:56 PM GMT+1	More than 12 hours	More than 10 years	Personal Computer/Laptop;Smart phone	Google	More than 6 times	Look for medication for specific disease;Look for symptoms and the possible diagnosis;Read more about disease diagnosed by your doctor	At a general search engine such as Google, Bing or Yahoo	Somewhat agree	More than 5 links	Completely agree	Completely agree	Completely agree	Completely agree	Completely agree	Completely agree	Completely agree	Completely agree	Neither disagree nor agree	Neither disagree nor agree	Somewhat agree	Somewhat agree	Completely agree	Somewhat agree	Completely agree	Completely agree	Somewhat agree	Completely agree	Neither disagree nor agree	Completely agree	Somewhat agree	Completely agree	Completely agree	Completely agree	Completely agree	Completely agree	Completely agree	I donâ€™t mind if it has both 1 & 2		Male	26-40	Yemen	Postgraduate	IT
2017/02/14 1:49:07 PM GMT+1	2-6 hours	5-10 years	Personal Computer/Laptop;Smart phone	Google	More than 6 times	because I'm pharmacist	At a site that specializes in health information, like NHS choices or WebMD (if you use a search engine to reach a specific site select this option)	Completely agree	More than 5 links	Completely agree	Completely agree	Neither disagree nor agree	Somewhat agree	Completely agree	Completely agree	Completely agree	Somewhat agree	Somewhat disagree	Completely agree	Completely agree	Completely agree	Completely agree	Completely agree	Completely agree	Completely agree	Somewhat agree	Somewhat agree	Completely agree	Somewhat agree	Neither disagree nor agree	Completely agree	Completely agree	Completely agree	Completely agree	Completely agree	Completely agree	Medicine of which the effectiveness was demonstrated scientifically in clinical trials.		Male	26-40	Saudi Arabia	Graduate/higher diploma	Medical related
2017/02/14 3:28:03 PM GMT+1	2-6 hours	5-10 years	Smart phone	Google	3-5 times	Look for symptoms and the possible diagnosis	At a general search engine such as Google, Bing or Yahoo	Completely disagree	2-3 links	Somewhat disagree	Somewhat agree	Completely disagree	Neither disagree nor agree	Neither disagree nor agree	Completely disagree	Completely disagree	Completely disagree	Completely disagree	Completely disagree	Somewhat agree	Somewhat agree	Somewhat agree	Somewhat agree	Completely agree	Completely agree	Completely agree	Completely agree	Completely agree	Completely agree	Completely agree	Completely agree	Completely agree	Completely agree	Completely agree	Completely agree	Completely agree	I donâ€™t know		Female	18-25	Canada	Postgraduate	Business related
2017/02/14 3:42:28 PM GMT+1	2-6 hours	More than 10 years	Personal Computer/Laptop	Google	More than 6 times	Look for medication for specific disease;Look for symptoms and the possible diagnosis;Read more about disease diagnosed by your doctor;Read about medications prescribed by your doctor	At a general search engine such as Google, Bing or Yahoo	Somewhat agree	More than 5 links	Somewhat agree	Completely agree	Completely agree	Completely agree	Somewhat agree	Completely agree	Completely agree	Completely agree	Somewhat agree	Completely agree	Completely agree	Completely agree	Completely agree	Completely agree	Completely agree	Somewhat agree	Somewhat disagree	Somewhat disagree	Somewhat disagree	Somewhat agree	Somewhat disagree	Somewhat disagree	Completely agree	Completely agree	Completely agree	Completely agree	Completely agree	I donâ€™t mind if it has both 1 & 2		Male	18-25	Yemen	Graduate/higher diploma	Medical related
2017/02/14 3:50:47 PM GMT+1	2-6 hours	5-10 years	Personal Computer/Laptop	Google	More than 6 times	Look for medication for specific disease;Look for symptoms and the possible diagnosis	At a general search engine such as Google, Bing or Yahoo	Somewhat disagree	4-5 links	Somewhat agree	Somewhat agree	Somewhat agree	Completely agree	Somewhat agree	Somewhat agree	Somewhat agree	Completely agree	Neither disagree nor agree	Somewhat agree	Completely agree	Completely agree	Completely agree	Completely agree	Completely agree	Completely agree	Somewhat agree	Completely agree	Completely disagree	Somewhat agree	Neither disagree nor agree	Completely agree	Completely agree	Completely agree	Somewhat agree	Completely agree	Somewhat agree	Only alternative medicine (any of a range of medical therapies that are not regarded by medical professionals)	For question number 28 I prefer websites that presnts alternative medicine because I can't take medical treatment just because it is mentioned in this webpage. I need to visit a physician.	Female	18-25	Jordan	Graduate/higher diploma	Medical related
2017/02/14 3:54:39 PM GMT+1	More than 12 hours	More than 10 years	Personal Computer/Laptop;Smart phone	Google	1-2 times	Look for medication for specific disease;Look for symptoms and the possible diagnosis	At a general search engine such as Google, Bing or Yahoo	Somewhat agree	4-5 links	Somewhat agree	Somewhat agree	Neither disagree nor agree	Neither disagree nor agree	Somewhat disagree	Somewhat disagree	Completely disagree	Neither disagree nor agree	Somewhat disagree	Somewhat disagree	Completely agree	Completely agree	Somewhat agree	Completely disagree	Somewhat agree	Neither disagree nor agree	Somewhat agree	Somewhat agree	Somewhat agree	Somewhat agree	Neither disagree nor agree	Completely agree	Somewhat agree	Somewhat agree	Neither disagree nor agree	Completely agree	Completely agree	I donâ€™t know		Male	26-40	Saudi Arabia	Postgraduate	Business related
2017/02/14 4:41:10 PM GMT+1	2-6 hours	More than 10 years	Personal Computer/Laptop;Tablet;Smart phone;Smart TV	Google	1-2 times	Look for symptoms and the possible diagnosis;Read more about disease diagnosed by your doctor	At a general search engine such as Google, Bing or Yahoo	Somewhat agree	4-5 links	Completely agree	Completely agree	Completely agree	Completely agree	Completely agree	Completely disagree	Completely disagree	Completely disagree	Completely disagree	Completely agree	Completely agree	Completely agree	Completely agree	Completely agree	Completely agree	Completely disagree	Completely agree	Completely agree	Somewhat agree	Completely agree	Completely agree	Completely agree	Completely agree	Completely agree	Completely agree	Completely agree	Completely agree	I donâ€™t know		Male	26-40	Canada	Postgraduate	Engineering/Math related
2017/02/14 7:44:22 PM GMT+1	7-12 hours	5-10 years	Personal Computer/Laptop;Smart phone	Google	3-5 times	Look for symptoms and the possible diagnosis	At a general search engine such as Google, Bing or Yahoo	Neither disagree nor agree	2-3 links	Somewhat agree	Completely agree	Somewhat agree	Neither disagree nor agree	Somewhat agree	Somewhat disagree	Neither disagree nor agree	Somewhat agree	Somewhat agree	Completely agree	Completely agree	Completely agree	Somewhat agree	Somewhat disagree	Somewhat agree	Somewhat agree	Neither disagree nor agree	Neither disagree nor agree	Somewhat disagree	Completely agree	Somewhat disagree	Completely agree	Completely agree	Somewhat agree	Neither disagree nor agree	Neither disagree nor agree	Completely agree	I donâ€™t know		Male	18-25	Canada	Graduate/higher diploma	Business related
2017/02/14 7:46:43 PM GMT+1	More than 12 hours	More than 10 years	Personal Computer/Laptop;Tablet;Smart phone	Google	More than 6 times	Look for symptoms and the possible diagnosis;Read more about disease diagnosed by your doctor;Read about medications prescribed by your doctor	At a general search engine such as Google, Bing or Yahoo	Completely agree	More than 5 links	Neither disagree nor agree	Completely agree	Completely agree	Completely agree	Completely agree	Completely agree	Neither disagree nor agree	Neither disagree nor agree	Completely disagree	Somewhat agree	Somewhat agree	Somewhat agree	Somewhat agree	Somewhat agree	Completely agree	Completely agree	Somewhat agree	Completely agree	Neither disagree nor agree	Completely agree	Neither disagree nor agree	Completely agree	Completely agree	Completely agree	Completely agree	Somewhat agree	Somewhat disagree	Medicine of which the effectiveness was demonstrated scientifically in clinical trials.		Male	18-25	Yemen	Graduate/higher diploma	psychology and math
2017/02/15 5:17:31 PM GMT+1	7-12 hours	3-5 years	Personal Computer/Laptop;Tablet;Smart phone	Google	More than 6 times	Look for medication for specific disease;Look for symptoms and the possible diagnosis;Read about medications prescribed by your doctor	At a general search engine such as Google, Bing or Yahoo	Somewhat agree	2-3 links	Neither disagree nor agree	Completely agree	Somewhat agree	Somewhat agree	Neither disagree nor agree	Neither disagree nor agree	Neither disagree nor agree	Neither disagree nor agree	Neither disagree nor agree	Completely agree	Somewhat agree	Neither disagree nor agree	Somewhat agree	Somewhat agree	Somewhat agree	Somewhat agree	Somewhat agree	Completely agree	Somewhat disagree	Somewhat agree	Somewhat agree	Somewhat agree	Somewhat agree	Somewhat agree	Somewhat agree	Somewhat agree	Completely agree	I donâ€™t know		Male	26-40	United States	Postgraduate	Business related
2017/02/17 7:37:41 AM GMT+1	More than 12 hours	More than 10 years	Personal Computer/Laptop;Smart phone	Google	3-5 times	Look for medication for specific disease;Look for symptoms and the possible diagnosis	At a general search engine such as Google, Bing or Yahoo	Neither disagree nor agree	More than 5 links	Somewhat agree	Somewhat agree	Somewhat agree	Somewhat agree	Somewhat agree	Somewhat agree	Neither disagree nor agree	Neither disagree nor agree	Neither disagree nor agree	Completely agree	Neither disagree nor agree	Neither disagree nor agree	Somewhat agree	Somewhat agree	Somewhat agree	Somewhat agree	Somewhat agree	Somewhat agree	Neither disagree nor agree	Neither disagree nor agree	Neither disagree nor agree	Somewhat agree	Somewhat agree	Somewhat agree	Somewhat agree	Somewhat agree	Somewhat agree	I donâ€™t know		Female	26-40	Malaysia	Postgraduate	Information Technology
2017/02/21 2:49:22 PM GMT+1	Less than 2 hours	5-10 years	Personal Computer/Laptop;Smart phone	Google	1-2 times	Look for symptoms and the possible diagnosis;Read more about disease diagnosed by your doctor	At a general search engine such as Google, Bing or Yahoo	Neither disagree nor agree	4-5 links	Completely agree	Completely agree	Completely agree	Completely agree	Completely agree	Completely agree	Somewhat agree	Somewhat agree	Somewhat agree	Completely agree	Completely agree	Completely agree	Completely agree	Completely agree	Completely agree	Somewhat agree	Completely agree	Completely agree	Somewhat disagree	Neither disagree nor agree	Neither disagree nor agree	Completely agree	Completely agree	Completely agree	Completely agree	Completely agree	Completely agree	Medicine of which the effectiveness was demonstrated scientifically in clinical trials.		Male	18-25	Yemen	High school	Medical related
2017/02/21 3:11:18 PM GMT+1	7-12 hours	5-10 years	Personal Computer/Laptop;Smart phone	Google	More than 6 times	Look for medication for specific disease;Look for symptoms and the possible diagnosis;Read more about disease diagnosed by your doctor;Read about medications prescribed by your doctor	At a site that specializes in health information, like NHS choices or WebMD (if you use a search engine to reach a specific site select this option)	Neither disagree nor agree	More than 5 links	Somewhat agree	Somewhat agree	Somewhat agree	Completely agree	Completely agree	Somewhat agree	Neither disagree nor agree	Somewhat agree	Neither disagree nor agree	Somewhat agree	Completely agree	Completely agree	Somewhat agree	Somewhat agree	Completely agree	Completely agree	Neither disagree nor agree	Somewhat disagree	Somewhat agree	Neither disagree nor agree	Completely disagree	Completely agree	Completely agree	Completely agree	Completely agree	Completely agree	Completely agree	Medicine of which the effectiveness was demonstrated scientifically in clinical trials.		Male	18-25	Yemen	Postgraduate	Medical related
2017/02/21 3:50:04 PM GMT+1	7-12 hours	More than 10 years	Personal Computer/Laptop;Tablet;Smart phone	Google	More than 6 times	Look for symptoms and the possible diagnosis;Read about medications prescribed by your doctor	At a site that specializes in health information, like NHS choices or WebMD (if you use a search engine to reach a specific site select this option)	Completely disagree	More than 5 links	Somewhat agree	Somewhat agree	Somewhat agree	Completely agree	Completely agree	Somewhat agree	Somewhat agree	Neither disagree nor agree	Neither disagree nor agree	Neither disagree nor agree	Neither disagree nor agree	Somewhat agree	Completely agree	Somewhat agree	Neither disagree nor agree	Somewhat disagree	Somewhat agree	Neither disagree nor agree	Neither disagree nor agree	Somewhat agree	Neither disagree nor agree	Somewhat agree	Neither disagree nor agree	Somewhat agree	Somewhat agree	Completely agree	Completely agree	I donâ€™t know	Thank u	Male	18-25	Yemen	Graduate/higher diploma	Medical related
2017/02/21 6:45:11 PM GMT+1	2-6 hours	5-10 years	Personal Computer/Laptop;Smart phone	Google	More than 6 times	Look for medication for specific disease;Look for symptoms and the possible diagnosis;Read more about disease diagnosed by your doctor	At a more general site like Wikipedia, that contains information on all kinds of topics (if you use a search engine to reach a specific site select this option)	Somewhat agree	2-3 links	Completely agree	Completely agree	Completely agree	Somewhat agree	Completely agree	Completely agree	Somewhat agree	Completely agree	Somewhat agree	Completely agree	Completely agree	Somewhat agree	Completely agree	Completely agree	Completely agree	Completely agree	Somewhat agree	Completely agree	Neither disagree nor agree	Neither disagree nor agree	Somewhat agree	Completely agree	Completely agree	Completely agree	Completely agree	Completely agree	Somewhat agree	Medicine of which the effectiveness was demonstrated scientifically in clinical trials.		Female	26-40	Yemen	Graduate/higher diploma	Medical related
2017/02/21 9:55:40 PM GMT+1	2-6 hours	More than 10 years	Personal Computer/Laptop;Tablet;Smart phone	Google	More than 6 times	Look for medication for specific disease;Look for symptoms and the possible diagnosis;Read more about disease diagnosed by your doctor;Read about medications prescribed by your doctor	At a general search engine such as Google, Bing or Yahoo	Somewhat agree	4-5 links	Completely agree	Completely agree	Somewhat agree	Completely agree	Completely disagree	Neither disagree nor agree	Completely agree	Completely agree	Completely agree	Completely agree	Completely agree	Completely agree	Completely agree	Somewhat agree	Somewhat agree	Somewhat agree	Somewhat disagree	Completely disagree	Somewhat agree	Completely agree	Neither disagree nor agree	Completely agree	Completely agree	Completely agree	Somewhat agree	Completely agree	Completely agree	Medicine of which the effectiveness was demonstrated scientifically in clinical trials.		Female	41-60	United Kingdom	Postgraduate	Medical related
2017/02/22 3:09:55 AM GMT+1	7-12 hours	5-10 years	Personal Computer/Laptop;Smart phone	Google	3-5 times	Look for medication for specific disease	At a more general site like Wikipedia, that contains information on all kinds of topics (if you use a search engine to reach a specific site select this option)	Completely agree	2-3 links	Completely agree	Completely agree	Somewhat agree	Completely agree	Completely agree	Completely agree	Neither disagree nor agree	Completely agree	Completely agree	Completely agree	Completely agree	Completely agree	Completely agree	Completely agree	Completely agree	Neither disagree nor agree	Completely agree	Completely agree	Completely agree	Completely agree	Completely agree	Completely agree	Completely agree	Completely agree	Completely agree	Completely agree	Completely agree	Only alternative medicine (any of a range of medical therapies that are not regarded by medical professionals)		Male	18-25	Yemen	High school	Arts related
2017/02/22 5:54:44 PM GMT+1	Less than 2 hours	5-10 years	Personal Computer/Laptop;Smart phone	Google	More than 6 times	Look for medication for specific disease;Look for symptoms and the possible diagnosis;Read more about disease diagnosed by your doctor;Read about medications prescribed by your doctor	At a more general site like Wikipedia, that contains information on all kinds of topics (if you use a search engine to reach a specific site select this option)	Somewhat agree	More than 5 links	Somewhat agree	Completely agree	Completely agree	Completely agree	Somewhat agree	Somewhat agree	Completely agree	Completely agree	Completely agree	Completely agree	Completely agree	Somewhat agree	Completely disagree	Completely agree	Completely agree	Completely agree	Completely disagree	Somewhat agree	Completely agree	Completely agree	Completely agree	Completely agree	Completely agree	Somewhat agree	Somewhat agree	Somewhat agree	Somewhat disagree	I donâ€™t mind if it has both 1 & 2		Female	18-25	Yemen	Graduate/higher diploma	Medical related
2017/02/23 8:20:36 PM GMT+1	More than 12 hours	More than 10 years	Personal Computer/Laptop;Tablet;Smart phone	Google	More than 6 times	As a med student I use it for furtger readings, clarification and updating.	At a general search engine such as Google, Bing or Yahoo	Somewhat agree	2-3 links	Neither disagree nor agree	Completely agree	Somewhat agree	Completely agree	Neither disagree nor agree	Neither disagree nor agree	Completely agree	Neither disagree nor agree	Completely disagree	Somewhat agree	Somewhat agree	Somewhat agree	Completely agree	Somewhat agree	Completely agree	Completely agree	Somewhat disagree	Completely disagree	Completely agree	Somewhat disagree	Neither disagree nor agree	Completely agree	Completely agree	Completely agree	Completely agree	Completely agree	Completely agree	Medicine of which the effectiveness was demonstrated scientifically in clinical trials.		Male	18-25	Yemen	Graduate/higher diploma	Medical related
2017/02/24 3:56:19 AM GMT+1	Less than 2 hours	5-10 years	Personal Computer/Laptop;Smart phone	Google	1-2 times	Look for symptoms and the possible diagnosis;Read about medications prescribed by your doctor	At a general search engine such as Google, Bing or Yahoo	Somewhat agree	4-5 links	Neither disagree nor agree	Completely agree	Completely agree	Completely agree	Neither disagree nor agree	Somewhat agree	Completely agree	Neither disagree nor agree	Neither disagree nor agree	Somewhat agree	Completely agree	Completely agree	Completely agree	Completely agree	Completely agree	Neither disagree nor agree	Somewhat agree	Completely agree	Completely agree	Completely agree	Completely disagree	Completely agree	Completely agree	Completely agree	Completely agree	Completely agree	Completely agree	I donâ€™t mind if it has both 1 & 2		Male	18-25	Saudi Arabia	Graduate/higher diploma	Business related
2017/03/06 5:37:01 PM GMT+1	7-12 hours	More than 10 years	Personal Computer/Laptop;Smart phone	Google	More than 6 times	Look for medication for specific disease;Look for symptoms and the possible diagnosis;Read more about disease diagnosed by your doctor;Read about medications prescribed by your doctor	At a general search engine such as Google, Bing or Yahoo	Somewhat agree	4-5 links	Somewhat agree	Somewhat agree	Somewhat agree	Somewhat agree	Neither disagree nor agree	Neither disagree nor agree	Neither disagree nor agree	Somewhat agree	Neither disagree nor agree	Somewhat agree	Completely agree	Completely agree	Somewhat agree	Neither disagree nor agree	Completely agree	Somewhat agree	Somewhat disagree	Somewhat agree	Completely agree	Somewhat agree	Neither disagree nor agree	Somewhat agree	Somewhat agree	Somewhat agree	Somewhat agree	Somewhat agree	Completely agree	I donâ€™t mind if it has both 1 & 2		Female	41-60	United Kingdom	Postgraduate	Arts related
2017/04/05 2:12:44 AM GMT+1	More than 12 hours	More than 10 years	Smart phone	Google	More than 6 times	Look for symptoms and the possible diagnosis	At a more general site like Wikipedia, that contains information on all kinds of topics (if you use a search engine to reach a specific site select this option)	Somewhat agree	4-5 links	Neither disagree nor agree	Somewhat disagree	Neither disagree nor agree	Neither disagree nor agree	Neither disagree nor agree	Neither disagree nor agree	Neither disagree nor agree	Somewhat disagree	Somewhat disagree	Neither disagree nor agree	Neither disagree nor agree	Somewhat agree	Somewhat disagree	Neither disagree nor agree	Somewhat disagree	Neither disagree nor agree	Neither disagree nor agree	Neither disagree nor agree	Somewhat disagree	Somewhat disagree	Neither disagree nor agree	Neither disagree nor agree	Neither disagree nor agree	Somewhat disagree	Neither disagree nor agree	Neither disagree nor agree	Somewhat disagree	I donâ€™t know		Female	>60	Yemen	Graduate/higher diploma	Medical related
2017/04/26 2:21:05 PM GMT+1	2-6 hours	More than 10 years	Personal Computer/Laptop;Tablet;Smart phone	Google	3-5 times	Look for medication for specific disease;Look for symptoms and the possible diagnosis	At a general search engine such as Google, Bing or Yahoo	Somewhat agree	2-3 links	Somewhat agree	Somewhat agree	Somewhat agree	Completely agree	Somewhat agree	Somewhat agree	Somewhat agree	Somewhat agree	Somewhat agree	Somewhat agree	Completely agree	Completely agree	Completely agree	Completely agree	Completely agree	Somewhat agree	Somewhat agree	Somewhat agree	Somewhat agree	Somewhat agree	Somewhat agree	Completely agree	Somewhat agree	Completely agree	Somewhat agree	Somewhat agree	Somewhat agree	Medicine of which the effectiveness was demonstrated scientifically in clinical trials.		Male	18-25	United Kingdom	High school	Medical related
2017/04/26 2:34:27 PM GMT+1	7-12 hours	5-10 years	Personal Computer/Laptop;Smart phone	Google	I have never sought health information online	I never seek health information online	I never sought health information online	Somewhat agree	2-3 links	Completely agree	Somewhat agree	Completely agree	Completely agree	Neither disagree nor agree	Neither disagree nor agree	Somewhat disagree	Neither disagree nor agree	Neither disagree nor agree	Somewhat disagree	Completely agree	Completely agree	Completely agree	Somewhat agree	Completely agree	Completely agree	Somewhat agree	Neither disagree nor agree	Somewhat disagree	Completely agree	Somewhat disagree	Completely agree	Somewhat agree	Somewhat agree	Neither disagree nor agree	Somewhat agree	Completely agree	Medicine of which the effectiveness was demonstrated scientifically in clinical trials.		Male	18-25	United Kingdom	Graduate/higher diploma	Medical related
2017/04/26 3:01:57 PM GMT+1	7-12 hours	5-10 years	Personal Computer/Laptop;Smart phone	Google	3-5 times	Look for symptoms and the possible diagnosis	At a general search engine such as Google, Bing or Yahoo	Somewhat agree	4-5 links	Neither disagree nor agree	Completely agree	Somewhat agree	Completely agree	Somewhat agree	Neither disagree nor agree	Somewhat agree	Somewhat agree	Neither disagree nor agree	Completely agree	Completely agree	Completely agree	Completely agree	Somewhat agree	Completely agree	Completely agree	Somewhat agree	Completely agree	Completely agree	Somewhat disagree	Somewhat disagree	Completely agree	Completely agree	Completely agree	Neither disagree nor agree	Somewhat agree	Somewhat agree	I donâ€™t mind if it has both 1 & 2	Question 21 doesn't make sense, you can't see if it has pictures/videos before clicking on it.	Male	18-25	United Kingdom	Graduate/higher diploma	Science
2017/04/26 3:13:59 PM GMT+1	More than 12 hours	More than 10 years	Personal Computer/Laptop;Smart phone	Google	More than 6 times	Look for medication for specific disease;Look for symptoms and the possible diagnosis;Research for medical degree	Medical journals such as the BMJ	Completely agree	2-3 links	Completely agree	Completely agree	Completely agree	Completely agree	Neither disagree nor agree	Neither disagree nor agree	Completely agree	Somewhat agree	Neither disagree nor agree	Completely agree	Neither disagree nor agree	Neither disagree nor agree	Completely agree	Neither disagree nor agree	Neither disagree nor agree	Somewhat agree	Completely disagree	Completely disagree	Somewhat agree	Completely disagree	Completely disagree	Completely agree	Somewhat agree	Neither disagree nor agree	Neither disagree nor agree	Neither disagree nor agree	Completely agree	Medicine of which the effectiveness was demonstrated scientifically in clinical trials.		Male	26-40	United Kingdom	Postgraduate	Medical related
2017/04/26 3:31:14 PM GMT+1	More than 12 hours	More than 10 years	Personal Computer/Laptop;Smart phone	Google	More than 6 times	Look for medication for specific disease;Look for symptoms and the possible diagnosis;Read about medications prescribed by your doctor;If medical advice should be sought for particular symptoms	At a general search engine such as Google, Bing or Yahoo	Somewhat agree	2-3 links	Neither disagree nor agree	Somewhat agree	Somewhat agree	Somewhat agree	Neither disagree nor agree	Neither disagree nor agree	Neither disagree nor agree	Neither disagree nor agree	Neither disagree nor agree	Completely agree	Completely agree	Completely agree	Somewhat agree	Somewhat agree	Somewhat agree	Somewhat agree	Neither disagree nor agree	Somewhat disagree	Somewhat agree	Somewhat disagree	Neither disagree nor agree	Somewhat agree	Completely agree	Somewhat agree	Neither disagree nor agree	Somewhat agree	Completely agree	I donâ€™t mind if it has both 1 & 2		Female	26-40	United Kingdom	Graduate/higher diploma	Medical related
2017/04/26 3:33:29 PM GMT+1	Less than 2 hours	5-10 years	Personal Computer/Laptop;Tablet;Smart phone	Google	More than 6 times	Look for symptoms and the possible diagnosis;Read more about disease diagnosed by your doctor;Read about medications prescribed by your doctor	At a site that specializes in health information, like NHS choices or WebMD (if you use a search engine to reach a specific site select this option)	Somewhat agree	4-5 links	Somewhat agree	Completely agree	Completely agree	Completely agree	Somewhat disagree	Neither disagree nor agree	Somewhat agree	Somewhat agree	Neither disagree nor agree	Somewhat agree	Completely agree	Completely agree	Somewhat agree	Completely agree	Completely agree	Somewhat disagree	Somewhat disagree	Neither disagree nor agree	Somewhat agree	Somewhat agree	Somewhat disagree	Completely agree	Somewhat agree	Somewhat agree	Somewhat agree	Somewhat disagree	Somewhat agree	I donâ€™t mind if it has both 1 & 2		Female	18-25	United Kingdom	High school	Medical related
2017/04/26 3:50:07 PM GMT+1	2-6 hours	More than 10 years	Personal Computer/Laptop;Smart phone	Google	More than 6 times	Look for medication for specific disease;Look for symptoms and the possible diagnosis;Read more about disease diagnosed by your doctor;Read about medications prescribed by your doctor;Research for degree	A mix depending on what information I want	Somewhat agree	4-5 links	Neither disagree nor agree	Somewhat agree	Somewhat agree	Somewhat agree	Somewhat agree	Somewhat agree	Somewhat agree	Somewhat agree	Somewhat agree	Somewhat agree	Completely agree	Completely agree	Somewhat agree	Somewhat agree	Completely agree	Somewhat disagree	Somewhat disagree	Somewhat disagree	Completely agree	Somewhat agree	Neither disagree nor agree	Somewhat agree	Somewhat agree	Somewhat agree	Somewhat agree	Somewhat agree	Completely agree	Medicine of which the effectiveness was demonstrated scientifically in clinical trials.		Female	18-25	United Kingdom	Graduate/higher diploma	Medical related
2017/04/26 4:13:31 PM GMT+1	7-12 hours	More than 10 years	Personal Computer/Laptop	Google	3-5 times	Look for symptoms and the possible diagnosis;Read more about disease diagnosed by your doctor;Read about medications prescribed by your doctor	At a general search engine such as Google, Bing or Yahoo	Somewhat agree	2-3 links	Neither disagree nor agree	Somewhat agree	Somewhat agree	Somewhat agree	Neither disagree nor agree	Neither disagree nor agree	Neither disagree nor agree	Neither disagree nor agree	Neither disagree nor agree	Completely agree	Completely agree	Somewhat agree	Neither disagree nor agree	Neither disagree nor agree	Somewhat agree	Neither disagree nor agree	Somewhat disagree	Neither disagree nor agree	Somewhat agree	Somewhat agree	Neither disagree nor agree	Somewhat agree	Somewhat agree	Neither disagree nor agree	Neither disagree nor agree	Neither disagree nor agree	Completely agree	Medicine of which the effectiveness was demonstrated scientifically in clinical trials.		Female	18-25	United Kingdom	Graduate/higher diploma	Medical related
2017/04/26 4:15:43 PM GMT+1	2-6 hours	More than 10 years	Personal Computer/Laptop	Google	More than 6 times	Part of medical school learning	BMJ best practice	Somewhat agree	Just one link	Neither disagree nor agree	Neither disagree nor agree	Somewhat agree	Completely agree	Neither disagree nor agree	Neither disagree nor agree	Neither disagree nor agree	Somewhat agree	Neither disagree nor agree	Somewhat agree	Completely agree	Completely agree	Completely agree	Somewhat agree	Completely agree	Completely agree	Neither disagree nor agree	Somewhat agree	Neither disagree nor agree	Neither disagree nor agree	Neither disagree nor agree	Somewhat agree	Completely agree	Completely agree	Somewhat agree	Completely agree	Completely disagree	Medicine of which the effectiveness was demonstrated scientifically in clinical trials.	I am a medical student, therefore I specifically go to sites like BMJ best practice or UpToDate if I want information regarding a medical condition.	Male	26-40	United Kingdom	Graduate/higher diploma	Medical related
2017/04/26 4:23:17 PM GMT+1	More than 12 hours	More than 10 years	Personal Computer/Laptop;Tablet;Smart phone;Smart TV	Google	3-5 times	Read about medications prescribed by your doctor	At a site that specializes in health information, like NHS choices or WebMD (if you use a search engine to reach a specific site select this option)	Somewhat agree	2-3 links	Somewhat disagree	Somewhat agree	Somewhat disagree	Somewhat agree	Completely disagree	Somewhat agree	Somewhat agree	Somewhat agree	Somewhat agree	Somewhat disagree	Somewhat agree	Somewhat agree	Somewhat agree	Neither disagree nor agree	Neither disagree nor agree	Somewhat disagree	Completely disagree	Completely disagree	Completely disagree	Somewhat agree	Neither disagree nor agree	Neither disagree nor agree	Neither disagree nor agree	Somewhat agree	Neither disagree nor agree	Somewhat agree	Neither disagree nor agree	Medicine of which the effectiveness was demonstrated scientifically in clinical trials.		Female	18-25	United Kingdom	High school	Medical related
2017/04/26 4:40:48 PM GMT+1	7-12 hours	More than 10 years	Personal Computer/Laptop	Google;ecosia	More than 6 times	Look for symptoms and the possible diagnosis;Read more about disease diagnosed by your doctor;Read about medications prescribed by your doctor	At a general search engine such as Google, Bing or Yahoo	Somewhat agree	2-3 links	Somewhat agree	Completely agree	Somewhat disagree	Completely agree	Completely disagree	Completely disagree	Somewhat disagree	Neither disagree nor agree	Somewhat disagree	Somewhat disagree	Completely agree	Completely agree	Completely agree	Somewhat disagree	Somewhat agree	Somewhat agree	Neither disagree nor agree	Somewhat disagree	Completely disagree	Somewhat agree	Somewhat disagree	Completely agree	Neither disagree nor agree	Somewhat agree	Neither disagree nor agree	Somewhat agree	Neither disagree nor agree	I donâ€™t mind if it has both 1 & 2		Female	18-25	United Kingdom	High school	Medical related
2017/04/26 4:55:48 PM GMT+1	2-6 hours	More than 10 years	Personal Computer/Laptop;Tablet;Smart phone	Google	More than 6 times	Look for symptoms and the possible diagnosis;Read more about disease diagnosed by your doctor;Read about medications prescribed by your doctor	At a general search engine such as Google, Bing or Yahoo	Somewhat agree	4-5 links	Somewhat agree	Somewhat agree	Somewhat agree	Completely agree	Neither disagree nor agree	Neither disagree nor agree	Somewhat agree	Somewhat agree	Neither disagree nor agree	Neither disagree nor agree	Completely agree	Completely agree	Completely agree	Somewhat agree	Completely agree	Somewhat agree	Somewhat disagree	Neither disagree nor agree	Neither disagree nor agree	Somewhat agree	Completely disagree	Completely agree	Completely agree	Somewhat agree	Somewhat agree	Somewhat agree	Completely agree	I donâ€™t mind if it has both 1 & 2		Female	18-25	United Kingdom	Graduate/higher diploma	Medical related
2017/04/26 5:23:20 PM GMT+1	7-12 hours	More than 10 years	Personal Computer/Laptop;Tablet;Smart phone;Smart TV	Google	More than 6 times	Look for medication for specific disease;Look for symptoms and the possible diagnosis;Read about medications prescribed by your doctor	At a more general site like Wikipedia, that contains information on all kinds of topics (if you use a search engine to reach a specific site select this option)	Somewhat agree	2-3 links	Neither disagree nor agree	Somewhat agree	Somewhat agree	Somewhat agree	Somewhat agree	Somewhat agree	Somewhat agree	Somewhat agree	Somewhat agree	Somewhat agree	Somewhat agree	Somewhat agree	Somewhat agree	Somewhat agree	Completely agree	Completely agree	Completely agree	Somewhat agree	Somewhat agree	Somewhat disagree	Neither disagree nor agree	Completely agree	Completely agree	Completely agree	Completely agree	Completely agree	Completely agree	Medicine of which the effectiveness was demonstrated scientifically in clinical trials.		Female	41-60	United Kingdom	Postgraduate	Medical related
2017/04/26 5:39:16 PM GMT+1	Less than 2 hours	5-10 years	Personal Computer/Laptop;Tablet;Smart phone	Google	3-5 times	Look for symptoms and the possible diagnosis;Read more about disease diagnosed by your doctor	At a general search engine such as Google, Bing or Yahoo	Somewhat agree	2-3 links	Neither disagree nor agree	Somewhat agree	Completely agree	Completely agree	Neither disagree nor agree	Neither disagree nor agree	Somewhat agree	Neither disagree nor agree	Neither disagree nor agree	Completely agree	Completely agree	Completely agree	Completely agree	Somewhat agree	Completely agree	Completely agree	Completely agree	Somewhat agree	Somewhat agree	Somewhat agree	Somewhat disagree	Completely agree	Somewhat agree	Somewhat agree	Neither disagree nor agree	Somewhat agree	Completely agree	Medicine of which the effectiveness was demonstrated scientifically in clinical trials.		Female	18-25	United Kingdom	Graduate/higher diploma	Medical related
2017/04/26 9:41:56 PM GMT+1	2-6 hours	More than 10 years	Personal Computer/Laptop;Smart phone	Google	More than 6 times	Look for medication for specific disease;Look for symptoms and the possible diagnosis;Read more about disease diagnosed by your doctor;Read about medications prescribed by your doctor	At a general search engine such as Google, Bing or Yahoo	Somewhat agree	2-3 links	Somewhat agree	Completely agree	Completely agree	Completely agree	Somewhat agree	Neither disagree nor agree	Completely agree	Completely agree	Neither disagree nor agree	Completely agree	Completely agree	Completely agree	Completely agree	Somewhat agree	Completely agree	Somewhat disagree	Completely disagree	Somewhat agree	Somewhat disagree	Somewhat disagree	Completely disagree	Completely agree	Completely agree	Completely agree	Neither disagree nor agree	Completely agree	Completely agree	Medicine of which the effectiveness was demonstrated scientifically in clinical trials.		Male	18-25	United Kingdom	Graduate/higher diploma	Medical related
2017/04/27 5:50:29 PM GMT+1	2-6 hours	More than 10 years	Personal Computer/Laptop;Smart phone	Google	More than 6 times	Look for medication for specific disease;Look for symptoms and the possible diagnosis;Read more about disease diagnosed by your doctor;Read about medications prescribed by your doctor	At a site that specializes in health information, like NHS choices or WebMD (if you use a search engine to reach a specific site select this option)	Neither disagree nor agree	More than 5 links	Somewhat agree	Completely agree	Neither disagree nor agree	Somewhat agree	Completely disagree	Neither disagree nor agree	Somewhat agree	Neither disagree nor agree	Completely disagree	Completely disagree	Completely agree	Completely agree	Completely agree	Neither disagree nor agree	Somewhat agree	Somewhat disagree	Somewhat agree	Somewhat disagree	Somewhat disagree	Somewhat agree	Completely disagree	Somewhat agree	Neither disagree nor agree	Neither disagree nor agree	Neither disagree nor agree	Neither disagree nor agree	Completely agree	Medicine of which the effectiveness was demonstrated scientifically in clinical trials.		Female	18-25	United Kingdom	Graduate/higher diploma	Medical related
2017/04/27 5:54:03 PM GMT+1	Less than 2 hours	More than 10 years	Personal Computer/Laptop;Smart phone	Google	3-5 times	Look for medication for specific disease;Read about medications prescribed by your doctor	At a general search engine such as Google, Bing or Yahoo	Somewhat agree	2-3 links	Neither disagree nor agree	Neither disagree nor agree	Completely agree	Completely agree	Neither disagree nor agree	Neither disagree nor agree	Neither disagree nor agree	Somewhat agree	Neither disagree nor agree	Somewhat disagree	Completely agree	Completely agree	Completely agree	Neither disagree nor agree	Somewhat agree	Somewhat disagree	Completely disagree	Completely disagree	Completely agree	Somewhat agree	Somewhat disagree	Completely agree	Somewhat disagree	Somewhat agree	Neither disagree nor agree	Somewhat agree	Completely agree	I donâ€™t mind if it has both 1 & 2		Female	18-25	United Kingdom	Graduate/higher diploma	Medical related
2017/05/04 8:42:28 PM GMT+1	7-12 hours	More than 10 years	Personal Computer/Laptop;Smart phone	Google;ecosia	1-2 times	Look for symptoms and the possible diagnosis	At a general search engine such as Google, Bing or Yahoo	Somewhat disagree	2-3 links	Somewhat disagree	Somewhat agree	Somewhat disagree	Somewhat agree	Somewhat agree	Somewhat disagree	Somewhat agree	Somewhat agree	Neither disagree nor agree	Completely agree	Completely agree	Completely agree	Somewhat agree	Somewhat disagree	Somewhat agree	Completely agree	Neither disagree nor agree	Somewhat disagree	Completely agree	Somewhat agree	Completely disagree	Somewhat agree	Completely agree	Completely agree	Somewhat agree	Somewhat agree	Completely agree	Medicine of which the effectiveness was demonstrated scientifically in clinical trials.		Female	26-40	United Kingdom	Postgraduate	Arts related
2017/05/04 8:58:37 PM GMT+1	2-6 hours	More than 10 years	Personal Computer/Laptop;Smart phone	Google	More than 6 times	Look for symptoms and the possible diagnosis;Read more about disease diagnosed by your doctor;Read about medications prescribed by your doctor	At a general search engine such as Google, Bing or Yahoo	Somewhat agree	2-3 links	Neither disagree nor agree	Neither disagree nor agree	Neither disagree nor agree	Completely agree	Neither disagree nor agree	Completely agree	Completely agree	Completely agree	Somewhat agree	Completely agree	Completely agree	Completely agree	Completely agree	Somewhat agree	Completely agree	Somewhat agree	Somewhat disagree	Neither disagree nor agree	Somewhat agree	Somewhat agree	Completely disagree	Completely agree	Somewhat agree	Neither disagree nor agree	Neither disagree nor agree	Completely agree	Completely agree	Medicine of which the effectiveness was demonstrated scientifically in clinical trials.		Female	18-25	Angola	Graduate/higher diploma	Arts related
2017/05/04 9:37:06 PM GMT+1	7-12 hours	5-10 years	Personal Computer/Laptop;Smart phone	Google	3-5 times	Look for symptoms and the possible diagnosis;Read more about disease diagnosed by your doctor;Read about medications prescribed by your doctor	At a site that specializes in health information, like NHS choices or WebMD (if you use a search engine to reach a specific site select this option)	Somewhat disagree	4-5 links	Somewhat agree	Somewhat agree	Somewhat agree	Somewhat agree	Somewhat agree	Somewhat agree	Somewhat agree	Completely agree	Neither disagree nor agree	Neither disagree nor agree	Completely agree	Completely agree	Completely agree	Neither disagree nor agree	Somewhat agree	Somewhat agree	Somewhat agree	Neither disagree nor agree	Somewhat agree	Somewhat disagree	Neither disagree nor agree	Somewhat agree	Somewhat agree	Somewhat agree	Somewhat agree	Somewhat agree	Completely agree	Medicine of which the effectiveness was demonstrated scientifically in clinical trials.		Female	41-60	United Kingdom	Postgraduate	Applied Chemical Sciences
2017/05/05 9:55:29 AM GMT+1	7-12 hours	More than 10 years	Personal Computer/Laptop;Smart phone	Google	1-2 times	Look for symptoms and the possible diagnosis;Read more about disease diagnosed by your doctor	At a general search engine such as Google, Bing or Yahoo	Somewhat disagree	2-3 links	Somewhat agree	Somewhat agree	Somewhat agree	Somewhat agree	Neither disagree nor agree	Neither disagree nor agree	Completely agree	Somewhat agree	Neither disagree nor agree	Somewhat agree	Completely agree	Somewhat agree	Completely agree	Somewhat agree	Somewhat agree	Somewhat agree	Somewhat disagree	Somewhat agree	Somewhat agree	Neither disagree nor agree	Somewhat disagree	Somewhat agree	Somewhat agree	Somewhat agree	Neither disagree nor agree	Somewhat agree	Completely agree	Medicine of which the effectiveness was demonstrated scientifically in clinical trials.		Male	18-25	United Kingdom	Postgraduate	Arts related
2017/05/05 7:54:42 PM GMT+1	2-6 hours	More than 10 years	Personal Computer/Laptop;Tablet;Smart phone	Google;Library catalogue when I need VERY specific information	1-2 times	Read more about disease diagnosed by your doctor;Read about medications prescribed by your doctor	Specific websites that focus on my disease	Somewhat disagree	More than 5 links	Somewhat agree	Somewhat agree	Neither disagree nor agree	Somewhat agree	Neither disagree nor agree	Neither disagree nor agree	Somewhat agree	Neither disagree nor agree	Neither disagree nor agree	Somewhat agree	Completely agree	Completely agree	Completely agree	Completely agree	Somewhat disagree	Completely agree	Somewhat disagree	Completely disagree	Completely agree	Somewhat disagree	Completely disagree	Completely agree	Somewhat agree	Somewhat disagree	Completely disagree	Somewhat disagree	Completely disagree	Medicine of which the effectiveness was demonstrated scientifically in clinical trials.		Female	26-40	Germany	Graduate/higher diploma	Business related
2017/05/14 9:38:58 AM GMT+1	More than 12 hours	3-5 years	Smart phone	Google	More than 6 times	Look for symptoms and the possible diagnosis;Read more about disease diagnosed by your doctor;Read about medications prescribed by your doctor	At a site that specializes in health information, like NHS choices or WebMD (if you use a search engine to reach a specific site select this option)	Somewhat agree	More than 5 links	Completely agree	Completely agree	Completely agree	Somewhat disagree	Completely disagree	Neither disagree nor agree	Completely disagree	Neither disagree nor agree	Completely disagree	Completely agree	Somewhat disagree	Somewhat disagree	Completely agree	Completely agree	Completely agree	Completely agree	Somewhat disagree	Completely agree	Completely disagree	Completely agree	Completely disagree	Completely agree	Completely agree	Completely agree	Completely agree	Completely agree	Completely agree	Medicine of which the effectiveness was demonstrated scientifically in clinical trials.		Male	18-25	United States	Graduate/higher diploma	Engineering/Math related
2017/06/16 3:43:16 PM GMT+1	7-12 hours	More than 10 years	Personal Computer/Laptop;Smart phone	Google;Yahoo!	More than 6 times	Look for symptoms and the possible diagnosis;Read about medications prescribed by your doctor	At a general search engine such as Google, Bing or Yahoo	Somewhat agree	4-5 links	Somewhat disagree	Somewhat disagree	Somewhat agree	Somewhat agree	Completely disagree	Somewhat disagree	Completely disagree	Somewhat disagree	Somewhat disagree	Completely agree	Completely agree	Completely agree	Completely agree	Somewhat disagree	Completely agree	Somewhat disagree	Somewhat agree	Completely agree	Completely agree	Somewhat agree	Somewhat disagree	Completely agree	Completely agree	Completely agree	Somewhat agree	Completely agree	Somewhat agree	I donâ€™t know		Female	26-40	United Kingdom	Graduate/higher diploma	Psychology
